# Supplementary material for: A chemical probe unravels the reactive proteome of health-associated catechols
Source: Royal Society of Chemistry journal article supplement (doi:10.1039/d3sc00888f), 2023-01-01
Supplement: d3sc00888f6.xlsx [file d3sc00888f6.xlsx]

## Sheet: key
Unbiased analysis of the selectivity of amino acid modification in Hek293 proteome by DA-P3
experimental set-up		Live Hek293 treated with 15 µM DA-P3, tagged with either light or heavy isoDTB labels at a ratio of 1:1. Data from two technical replicates.
figure		Fig. 3
worksheets	modifications	masses of modification identified by open search. Expected mass of modification L : 754.41261; H : 760.42010. Table shows data identified in two technical replicates.	data analysis performed with the MSFragger-based FragPipe platform.
	selectivity	sites identified in an offset search after extensive downstream filtering as used for the determination of the amino acid selectivity of DA-P3. Table shows data identified in two technical replicates.
	quantification	residues quantified by closed search.
abbreviations		isoDTB = isotopically labeled desthiobiotin; PSM = peptide spectrum matches; L = light isoDTB tag; H = heavy isoDTB tag; ID = identifier

## Sheet: modifications
Modification	Theoretical Mass Shift	default-ptmshepherd-dataset (PSMs)
None	0	3936
First isotopic peak	1.00335	1921
Second isotopic peak	2.00671	1743
Carbamidomethyl on K/Carbamidomethyl on H/Carbamidomethyl on D/Carbamidomethyl on E/Carbamidomethyl on S/Carbamidomethyl on T/Carbamidomethyl on Y/Carbamidomethyl of peptide N term/Addition of G	57.0215	1391
Unannotated mass-shift 754.4120	754.412	829
Unannotated mass-shift 760.4206	760.421	827
Third isotopic peak	3.01006	338
ubiquitinylation residue/Addition of N	114.043	211
Failed_Carbamidomethylation/Deletion of G	-57.0215	146
Unannotated mass-shift -0.0164	-0.0164	135
Unannotated mass-shift 60.0168	60.0168	101
Unannotated mass-shift 130.0990	130.099	92
Acetyl/Acetyl on S/Acetyl on K/Acetyl on C/Acetyl on T	42.0106	91
Unannotated mass-shift 57.0402	57.0402	90
Oxidation on Y/Oxidation on W/Oxidation on P/Oxidation on F/Oxidation on D/Oxidation on E/Oxidation on V/Oxidation on H/Oxidation on K/Oxidation on N/Oxidation on R/Oxidation on C	15.9949	84
Unannotated mass-shift 59.0436	59.0436	63
Unannotated mass-shift 17.0184	17.0184	63
Unannotated mass-shift 129.0918	129.092	50
TriMethylation	42.047	50
Unannotated mass-shift 98.0718	98.0718	48
Unannotated mass-shift 818.3758	818.376	46
Unannotated mass-shift 756.3980	756.398	42
Addition of P	97.0528	42
Unannotated mass-shift 818.4452	818.445	40
Unannotated mass-shift 762.4060	762.406	38
Unannotated mass-shift 1.0388	1.0388	38
Unannotated mass-shift 185.1124	185.112	37
Unannotated mass-shift 755.3886	755.389	34
Unannotated mass-shift 666.3932	666.393	30
Oxidation of W to Kynurenine	3.9949	30
Unannotated mass-shift 3.0234	3.0234	29
Unannotated mass-shift 60.0578	60.0578	29
Unannotated mass-shift 125.8958	125.896	28
Unannotated mass-shift 371.2300	371.23	26
Unannotated mass-shift 665.3862	665.386	25
Unannotated mass-shift 56.9940	56.994	25
Unannotated mass-shift 825.3838	825.384	24
Unannotated mass-shift 175.0580	175.058	23
Unannotated mass-shift 39.9934	39.9934	23
Unannotated mass-shift 0.9630	0.963	23
Arginine not cleaved at N-term/Arginine not cleaved at C-term/Addition of R	156.101	22
Unannotated mass-shift 209.0152	209.015	22
Unannotated mass-shift 672.3920	672.392	22
H-2 on pep term M/Didehydro on Y/Didehydro on S	-2.0157	21
Unannotated mass-shift 286.1996	286.2	20
Unannotated mass-shift 158.1148	158.115	20
Carboxylation on K/Carboxylation on D/Carboxylation on E	43.9898	19
Unannotated mass-shift 257.1470	257.147	19
Methyl on C/Methyl on H/Methyl on K/Methyl on N/Methyl on Q/Methyl on R/Methyl on I/Methyl on L/Methyl on D/Methyl on E/Methyl on S/Methyl on T/N-Term Methyl/C-Term Methyl	14.0157	18
Unannotated mass-shift 75.0486	75.0486	18
Formylation/Formylation on K/Formylation on S/Formylation on T	27.9949	18
Unannotated mass-shift 18.9948	18.9948	17
Ammonia loss on Q/Ammonia loss on C/Ammonia loss	-17.0265	17
Unannotated mass-shift 99.0198	99.0198	16
Unannotated mass-shift 129.1060	129.106	16
Unannotated mass-shift 671.3896	671.39	16
Addition of V	99.0684	15
Unannotated mass-shift 19.0488	19.0488	15
Unannotated mass-shift 727.4438	727.444	14
Unannotated mass-shift 824.3820	824.382	14
Unannotated mass-shift 483.2808	483.281	14
Unannotated mass-shift 116.0784	116.078	13
Unannotated mass-shift 545.2976	545.298	13
Unannotated mass-shift 316.1576	316.158	12
Unannotated mass-shift 16.0054	16.0054	12
Dioxidation on W/Dioxidation on P/Dioxidation on R/Dioxidation on K/Dioxidation on M/Dioxidation on F/Dioxidation on Y/Dioxidation on C	31.9898	12
Unannotated mass-shift 118.0570	118.057	12
Addition of S	87.032	11
Unannotated mass-shift 778.4438	778.444	11
Unannotated mass-shift 801.3910	801.391	10
Unannotated mass-shift 814.4424	814.442	10
Unannotated mass-shift -12.0262	-12.0262	10
Unannotated mass-shift 243.1930	243.193	10
Ethyl on K/Ethyl on E/Ethyl/DiMethyl on K/DiMethyl on R/DiMethyl on N	28.0313	9
Unannotated mass-shift 341.1622	341.162	9
Unannotated mass-shift 329.1776	329.178	9
Unannotated mass-shift 75.0198	75.0198	9
Unannotated mass-shift 655.3472	655.347	9
Unannotated mass-shift 583.3452	583.345	9
Unannotated mass-shift 527.3100	527.31	8
Unannotated mass-shift 2.0522	2.0522	8
Unannotated mass-shift 516.2324	516.232	7
Unannotated mass-shift 969.5502	969.55	6
Unannotated mass-shift 485.2980	485.298	6
Unannotated mass-shift 210.1796	210.18	6
Unannotated mass-shift 494.2696	494.27	6
Unannotated mass-shift 773.3910	773.391	6
Unannotated mass-shift 783.4662	783.466	6
Unannotated mass-shift 927.4654	927.465	6
Unannotated mass-shift 23.9820	23.982	6
Unannotated mass-shift 376.2414	376.241	6
Unannotated mass-shift 645.3278	645.328	6
Unannotated mass-shift 784.4168	784.417	6
Unannotated mass-shift 24.0618	24.0618	6
Unannotated mass-shift 121.0142	121.014	6
Unannotated mass-shift 811.4782	811.478	5
Deletion of S	-87.032	5
Unannotated mass-shift 117.0024	117.002	5
Unannotated mass-shift 513.3130	513.313	5
Unannotated mass-shift 1.8806	1.8806	5
Unannotated mass-shift 201.1384	201.138	5
Unannotated mass-shift 774.4044	774.404	5
Unannotated mass-shift -98.0870	-98.087	5
Unannotated mass-shift 303.1912	303.191	4
Unannotated mass-shift 553.3304	553.33	4
Unannotated mass-shift 297.1982	297.198	4
Unannotated mass-shift 347.1696	347.17	4
Unannotated mass-shift -11.9968	-11.9968	4
Unannotated mass-shift 79.1556	79.1556	4
Unannotated mass-shift 763.3992	763.399	4
Unannotated mass-shift 459.1928	459.193	4
Unannotated mass-shift 320.1676	320.168	4
Unannotated mass-shift 283.0998	283.1	4
Unannotated mass-shift 724.4720	724.472	4
Unannotated mass-shift 460.4012	460.401	4
Unannotated mass-shift 305.1706	305.171	4
Unannotated mass-shift 245.1432	245.143	4
Unannotated mass-shift 820.4084	820.408	4
Unannotated mass-shift 116.0098	116.01	3
Unannotated mass-shift 200.0484	200.048	3
Unannotated mass-shift 888.5406	888.541	3
Unannotated mass-shift 742.4836	742.484	3
Unannotated mass-shift 148.0270	148.027	3
Unannotated mass-shift 8.0018	8.0018	3
Unannotated mass-shift 427.1838	427.184	3
Unannotated mass-shift 661.3524	661.352	3
Unannotated mass-shift 866.6078	866.608	3
Unannotated mass-shift 625.4132	625.413	3
Unannotated mass-shift 1.9226	1.9226	3
Unannotated mass-shift 778.4542	778.454	3
Unannotated mass-shift 397.2808	397.281	3
Unannotated mass-shift 798.5146	798.515	3
Unannotated mass-shift 938.5414	938.541	3
Unannotated mass-shift 670.3626	670.363	3
Unannotated mass-shift 401.2066	401.207	3
Trioxidation of C	47.9847	3
Glucuronyl on Nxs/Glucuronyl on Nxt/Glucuronyl on S/Glucuronyl on T	176.032	3
Unannotated mass-shift 504.2904	504.29	3
Unannotated mass-shift 615.3542	615.354	3
Unannotated mass-shift 951.4708	951.471	3
Unannotated mass-shift 313.2130	313.213	2
Unannotated mass-shift 460.2498	460.25	2
Unannotated mass-shift 259.1692	259.169	2
Unannotated mass-shift 653.3158	653.316	2
Unannotated mass-shift 455.2588	455.259	2
Unannotated mass-shift 131.1272	131.127	2
Unannotated mass-shift 20.0160	20.016	2
Unannotated mass-shift -28.9258	-28.9258	2
Unannotated mass-shift 987.5884	987.588	2
Unannotated mass-shift 579.2768	579.277	2
Unannotated mass-shift 301.0960	301.096	2
Unannotated mass-shift 847.3844	847.384	2
Unannotated mass-shift 740.4162	740.416	2
Unannotated mass-shift 961.5282	961.528	2
Unannotated mass-shift 837.5540	837.554	2
Unannotated mass-shift 616.3056	616.306	2
Unannotated mass-shift 392.1904	392.19	2
Unannotated mass-shift 703.3144	703.314	2
Unannotated mass-shift 936.5964	936.596	2
Unannotated mass-shift 935.5872	935.587	2
Unannotated mass-shift 895.5184	895.518	2
Unannotated mass-shift 152.8280	152.828	2

## Sheet: selectivity
Identifier	Modified residue	UniProt ID
Q9ULT8_C1389	C	Q9ULT8
Q8NC51_C11	C	Q8NC51
Q9HC52_C261	C	Q9HC52
Q7Z4H7_C926	C	Q7Z4H7
Q9HDC5_C626	C	Q9HDC5
P16615_C997	C	P16615
Q9GZU3_C18	C	Q9GZU3
P49321_C708	C	P49321
Q86XL3_C286	C	Q86XL3
Q9H910_C118	C	Q9H910
Q96KC8_C380	C	Q96KC8
Q9UNY4_C224	C	Q9UNY4
Q99439_C175	C	Q99439
O14967_C511	C	O14967
Q9BX95_C76	C	Q9BX95
Q9H6T3_C519	C	Q9H6T3
Q8NFQ8_C47	C	Q8NFQ8
O95861_T41	T	O95861
Q8N2K0_C15	C	Q8N2K0
P30519_C265	C	P30519
A1L0T0_C568	C	A1L0T0
Q8WYP5_C1628	C	Q8WYP5
O95817_C179	C	O95817
Q7Z434_C283	C	Q7Z434
Q9BXB4_C34	C	Q9BXB4
Q5VV42_C538	C	Q5VV42
P35611_C525	C	P35611
Q15005_C17	C	Q15005
Q6ZWT7_C505	C	Q6ZWT7
P07814_C744	C	P07814
O15355_C241	C	O15355
Q14694_C254	C	Q14694
Q9NUM4_C61	C	Q9NUM4
Q9H814_C51	C	Q9H814
Q9UHD8_C248	C	Q9UHD8
P50851_C1228	C	P50851
Q14694_C94	C	Q14694
Q9UI10_C69	C	Q9UI10
Q6NXT6_C474	C	Q6NXT6
Q9Y2U8_C346	C	Q9Y2U8
Q9BU23_C696	C	Q9BU23
O76071_C234	C	O76071
Q92575_C144	C	Q92575
Q9HCU5_C128	C	Q9HCU5
Q15417_C173	C	Q15417
Q15365_C194	C	Q15365
P49790_C68	C	P49790
P18031_C344	C	P18031
Q6L8Q7_C108	C	Q6L8Q7
P54105_C73	C	P54105
P49790_C21	C	P49790
Q92545_C1188	C	Q92545
Q96BY9_C320	C	Q96BY9
P02545_C591	C	P02545
Q92615_C590	C	Q92615
Q7Z2K6_C43	C	Q7Z2K6
Q8N6T3_C351	C	Q8N6T3
Q9H7E9_C50	C	Q9H7E9
Q7L5N7_C4	C	Q7L5N7
P20810_C408	C	P20810
Q8TC07_C686	C	Q8TC07
Q9UBP0_C220	C	Q9UBP0
Q9H2G2_C1212	C	Q9H2G2
O75460_C538	C	O75460
P27816_C635	C	P27816
O95793_C574	C	O95793
Q5SNT2_C617	C	Q5SNT2
Q8NFG4_C335	C	Q8NFG4
Q8N5B7_C369	C	Q8N5B7
Q86SK9_C14	C	Q86SK9
Q8TD19_C878	C	Q8TD19
Q8N5K1_C92	C	Q8N5K1
Q8WWK9_C674	C	Q8WWK9
P14923_C49	C	P14923
O95905_C557	C	O95905
P78347_C215	C	P78347
O15027_C2293	C	O15027
P46821_C2041	C	P46821
Q9ULH7_C636	C	Q9ULH7
Q9UNY4_C204	C	Q9UNY4
P30519_C282	C	P30519
Q5SW79_C212	C	Q5SW79
Q6FI81_C237	C	Q6FI81
O14654_C522	C	O14654
O75369_C2501	C	O75369
Q9BSD7_C101	C	Q9BSD7
O60831_C28	C	O60831
A6NDG6_C297	C	A6NDG6
Q16637_C60	C	Q16637
Q8TCD1_C71	C	Q8TCD1
Q8WYP5_C1412	C	Q8WYP5
O75122_C976	C	O75122
Q8IY26_C55	C	Q8IY26
Q6IBS0_C141	C	Q6IBS0
Q12769_C1166	C	Q12769
Q8N2K0_C52	C	Q8N2K0
O60664_C60	C	O60664
P49790_C1065	C	P49790
Q7Z6Z7_C2721	C	Q7Z6Z7
O75410_C482	C	O75410
Q9NUQ3_C56	C	Q9NUQ3
P27816_C535	C	P27816
Q6NXT6_C487	C	Q6NXT6
O14654_C545	C	O14654
P23921_C779	C	P23921
Q99614_C28	C	Q99614
Q9NSV4_C1125	C	Q9NSV4
Q6ZN17_C201	C	Q6ZN17
Q8NFH5_C255	C	Q8NFH5
Q9H6F5_C116	C	Q9H6F5
O75410_C174	C	O75410
Q9HA64_C24	C	Q9HA64
P54687_C8	C	P54687
O15270_C19	C	O15270
Q9Y6A5_S424	S	Q9Y6A5
Q9Y2G8_C744	C	Q9Y2G8

## Sheet: quantification
Identifier	Protein ID	Peptide Sequence	Modified Peptide	modified amino acid	Log2 Ratio HL replicate 1	Log2 Ratio HL replicate 2	Log2 Ratio HL	Total Light Intensity	Total Heavy Intensity	Total Intensity
Q9ULW0_C536	Q9ULW0	TVEICPFSFDSR	TVEIC*PFSFDSR	C	-0.000515158		Missed Filter (-0.000515157537449072; )	4069115	4.06767e+06	8.13679e+06
P46013_C1007	P46013	MPCQSLQPEPINTPTHTK	MPC*QSLQPEPINTPTHTK	C	-0.000531352		Missed Filter (-0.000531352246430757; )	6.75483e+06	6752343	1.35072e+07
Q8TEU7_C1368	Q8TEU7	GSWTSCSSSSHDNFQSLPNPK	GSWTSC*SSSSHDNFQSLPNPK	C	0.00100609		Missed Filter (0.0010060915824732; )	3.20435e+06	3206590	6.41094e+06
O75663_C87	O75663	VACAEEWQESR	VAC*AEEWQESR	C	-0.00119662		Missed Filter (-0.00119662141837147; )	1.19071e+07	11897743	2.38048e+07
P04183_C66	P04183	YSSSFCTHDR	YSSSFC*THDR	C	0.00259392		Missed Filter (0.00259391681196584; )	5991090	6.00187e+06	1.1993e+07
Q9NZT2_C443	Q9NZT2	TGTQEVGGQDPGEAVQPCR	TGTQEVGGQDPGEAVQPC*R	C	0.00291405		Missed Filter (0.00291405275863034; )	3548854	3.55603e+06	7.10488e+06
Q9H1C4_C583	Q9H1C4	RPCPYEQAQGGDGPEEQ	RPC*PYEQAQGGDGPEEQ	C	0.00444588		Missed Filter (0.00444587761072469; )	4.34598e+07	4.36017e+07	8.70615e+07
Q9Y5Y2_C269	Q9Y5Y2	ILDATPACLP	ILDATPAC*LP	C	0.00455807		Missed Filter (0.00455807145986457; )	13026668	13067890	26094558
P50851_C950	P50851	VDEEIGLCSSTSVQAASGIR	VDEEIGLC*SSTSVQAASGIR	C	-0.00501667		Missed Filter (-0.00501666631875388; )	40746662	40605244	81351906
P04049_C27	P04049	DAVFDGSSCISPTIVQQFGYQR	DAVFDGSSC*ISPTIVQQFGYQR	C	0.00542177		Missed Filter (0.00542176648870009; )	1.06049e+07	1.06493e+07	2.12542e+07
O43164_C105	O43164	SETEIPTCGSALNQTTESSQSFVAVHHSEEGR	SETEIPTC*GSALNQTTESSQSFVAVHHSEEGR	C	0.00551987		Missed Filter (0.00551987287388175; )	1.56676e+06	1.57276e+06	3139519
Q9H0U9_C135	Q9H0U9	ALEICGAQR	ALEIC*GAQR	C	-0.00596618		Missed Filter (-0.00596618118632149; )	6602444	6.57517e+06	1.31776e+07
Q9BZ67_C246	Q9BZ67	QVQEVSSDGGCEAALGTHYR	QVQEVSSDGGC*EAALGTHYR	C	0.00683643		Missed Filter (0.00683642539804951; )	1.11358e+06	1.11887e+06	2.23246e+06
Q14C86_C741	Q14C86	LQELESCSGLGSTSDDTDVR	LQELESC*SGLGSTSDDTDVR	C	0.00713077		Missed Filter (0.00713077060543313; )	1.48425e+07	1.49161e+07	2.97586e+07
Q96HE9_C161	Q96HE9	LTNVPACVLITPGDSK	LTNVPAC*VLITPGDSK	C	0.00716212		Missed Filter (0.00716212440495708; )	6.66198e+06	6.69513e+06	13357112
Q92545_C1747	Q92545	SCNQASQR	SC*NQASQR	C	0.00746055		Missed Filter (0.00746054595876651; )	2.27181e+06	2283592	4.55541e+06
Q8NEY1_C337	Q8NEY1	LQAGDAPSVGGSCR	LQAGDAPSVGGSC*R	C	0.00751376		Missed Filter (0.00751375570291709; )	3.46847e+06	3.48658e+06	6955055
O60610_C1227	O60610	AGCAVTSLLASELTK	AGC*AVTSLLASELTK	C	0.0076797		Missed Filter (0.00767970277773071; )	7.92302e+06	7965203	1.58882e+07
Q8IW35_C852	Q8IW35	LNAEVQGQQPECDSTFQLLHVGVTV	LNAEVQGQQPEC*DSTFQLLHVGVTV	C	-0.00786916		Missed Filter (-0.00786916250028423; )	1.83485e+06	1.82487e+06	3659728
Q9HBK9_C334	Q9HBK9	LPTSGGCSALELK	LPTSGGC*SALELK	C	-0.00791501		Missed Filter (-0.00791500990227517; )	1.29134e+07	12840458	2.57539e+07
Q9NUP1_C211	Q9NUP1	TEDYFPCCSERPQL	TEDYFPCC*SERPQL	C	-0.00804114		Missed Filter (-0.00804114496387525; )	2446024	2.43243e+06	4.87845e+06
Q08378_C136	Q08378	LSLPMQETQLCSTDSPLPLEKEEQVR	LSLPMQETQLC*STDSPLPLEKEEQVR	C	-0.00829274		Missed Filter (-0.00829273829363209; )	8.27387e+06	8.22019e+06	1.64941e+07
Q96EK7_C356	Q96EK7	QEVPMCTGPESR	QEVPMC*TGPESR	C	0.00829283		Missed Filter (0.00829283282749965; )	7.76368e+06	7.8096e+06	1.55733e+07
Q96CS3_C349	Q96CS3	KLECLPPEPSPDDPESVK	KLEC*LPPEPSPDDPESVK	C	-0.00832644		Missed Filter (-0.00832644414523908; )	13219182	13143108	26362290
Q9UGV2_C359	Q9UGV2	SVTSNQSDGTQESCESPDVLDR	SVTSNQSDGTQESC*ESPDVLDR	C	0.00891925		Missed Filter (0.00891925355939657; )	10028025	1.08913e+07	20118239
Q9UKX7_C151	Q9UKX7	ACVGNAYHK	AC*VGNAYHK	C	0.00925286		Missed Filter (0.00925285604361148; )	6.41233e+06	6453584	1.28659e+07
Q92615_C633	Q92615	LPSALTATACK	LPSALTATAC*K	C	-0.00969228		Missed Filter (-0.00969227995654308; )	1.42245e+07	14120732	2.83453e+07
P42702_C889	P42702	SVCEGSSALK	SVC*EGSSALK	C	-0.00974123		Missed Filter (-0.00974123368142174; )	1.72622e+06	1714606	3.44083e+06
Q15477_C247	Q15477	GDTVSASPCSAPLAR	GDTVSASPC*SAPLAR	C	-0.00991481		Missed Filter (-0.0099148125074806; )	1.70185e+07	1.68823e+07	33900799
Q9Y570_C386	Q9Y570	FAEPIGGFQCVFPGC	FAEPIGGFQCVFPGC*	C	-0.0100469		Missed Filter (-0.0100468719665429; )	841764	835923	1.67769e+06
Q12933_C171	Q12933	APCCGADVK	APCC*GADVK	C	0.0104591		Missed Filter (0.0104591284404306; )	5.2005e+06	5.23834e+06	10438838
Q96G97_C395	Q96G97	QRPTCSSS	QRPTC*SSS	C	-0.0107574		Missed Filter (-0.0107574497955229; )	60060884	59614704	119675588
P15924_C174	P15924	GGGGYTCQSGSGWDEFTK	GGGGYTC*QSGSGWDEFTK	C	-0.0107798		Missed Filter (-0.0107798017769732; )	9374606	9304820	18679426
Q49MG5_C239	Q49MG5	AFSENLDPEDSCLTSLASSSLK	AFSENLDPEDSC*LTSLASSSLK	C	-0.0109407		Missed Filter (-0.010940694279569; )	6585212	6535462	13120674
P50552_C334	P50552	SSSSVTTSETQPCTPSSSDYSDLQR	SSSSVTTSETQPC*TPSSSDYSDLQR	C	-0.0110808		Missed Filter (-0.0110808075367238; )	3124056	3.10015e+06	6.22421e+06
P31751_C124	P31751	CGSPSDSSTTEEMEVAVSK	C*GSPSDSSTTEEMEVAVSK	C	0.0116279		Missed Filter (0.0116278847050594; )	7376188	7435879	14812067
P48066_C28	P48066	ESEAPGGGCSSGGAAPAR	ESEAPGGGC*SSGGAAPAR	C	0.011863		Missed Filter (0.0118629552055895; )	4.19945e+06	4234122	8.43357e+06
O60566_C503	O60566	IPGMTLSSSVCQVNCCAR	IPGMTLSSSVCQVNC*CAR	C	-0.0124836		Missed Filter (-0.012483556425632; )	5883393	5832704	11716097
Q96E22_C164	Q96E22	QQQELLGLDCSK	QQQELLGLDC*SK	C	-0.0129596		Missed Filter (-0.012959569819989; )	5829988	5.77785e+06	1.16078e+07
Q8IX90_C215	Q8IX90	MDDFECVTPK	MDDFEC*VTPK	C	-0.0130234		Missed Filter (-0.0130234319337052; )	2.6768e+06	2652749	5.32955e+06
Q5UIP0_C1904	Q5UIP0	MELSLENVTVEGNACK	MELSLENVTVEGNAC*K	C	-0.0132684		Missed Filter (-0.0132684498359532; )	18754518	1.85833e+07	3.73378e+07
P51957_C401	P51957	YLDASNELGGICSISQVEEEMLQDNTK	YLDASNELGGIC*SISQVEEEMLQDNTK	C	0.0136672		Missed Filter (0.013667184677137; )	1.98921e+06	2.00814e+06	3.99734e+06
Q13190_C68	Q13190	TQEFLSACK	TQEFLSAC*K	C	0.0141182		Missed Filter (0.0141182303243064; )	3374587	3.40777e+06	6.78236e+06
Q12802_C1394	Q12802	ENWCTIEPCPDAASLLASK	ENWC*TIEPCPDAASLLASK	C	0.0144809		Missed Filter (0.0144809404140957; )	2.24246e+06	2.26508e+06	4.50754e+06
Q9NR50_C285	Q9NR50	EANTLNLAPYDACWNACR	EANTLNLAPYDACWNAC*R	C	-0.0146635		Missed Filter (-0.0146634697851316; )	5147700	5095644	10243344
Q9NYP9_C231	Q9NYP9	LSFATCK	LSFATC*K	C	-0.0149844		Missed Filter (-0.0149844024946045; )	6538010	6470455	13008465
Q8NCE2_C429	Q8NCE2	DGGFTLEDICMLR	DGGFTLEDIC*MLR	C	-0.0150329		Missed Filter (-0.0150328552426311; )	5.05731e+06	5.00483e+06	1.00621e+07
Q15003_C402	Q15003	SWKEPCQVQSCQEEMISLGDGDIR	SWKEPCQVQSC*QEEMISLGDGDIR	C	0.015444		Missed Filter (0.0154439784154097; )	2.00493e+06	2.02651e+06	4.03144e+06
O75152_C636	O75152	CAAQTLEK	C*AAQTLEK	C	-0.01558		Missed Filter (-0.0155799765480712; )	4574808	4.52567e+06	9.10048e+06
Q9UN36_C321	Q9UN36	YFLQGMGYMASSCMTR	YFLQGMGYMASSC*MTR	C	-0.0159235		Missed Filter (-0.0159235450414252; )	5023842	4968697	9992539
Q8IXW5_C358	Q8IXW5	SVSSSVQVCPEVGKR	SVSSSVQVC*PEVGKR	C	0.016702		Missed Filter (0.0167020396656636; )	1.90704e+06	1.92925e+06	3.8363e+06
Q8WWK9_C648	Q8WWK9	DHYPCVSSLEQLTELGR	DHYPC*VSSLEQLTELGR	C	0.016732		Missed Filter (0.0167319598998278; )	1.81923e+06	1840447	3.65967e+06
O43303_C436	O43303	LPTDLAGVCSSK	LPTDLAGVC*SSK	C	-0.0172018		Missed Filter (-0.017201778193555; )	3.40792e+06	3.36752e+06	6775439
Q9UGP4_C305	Q9UGP4	TPSVSAPLALSCPR	TPSVSAPLALSC*PR	C	0.0173861		Missed Filter (0.0173861398966207; )	2449972	2.47968e+06	4.92965e+06
P54136_C34	P54136	NCGCLGASPNLEQLQEENLK	NCGC*LGASPNLEQLQEENLK	C	-0.0177788		Missed Filter (-0.0177787920084779; )	1.62703e+07	16071030	3.23413e+07
Q6WKZ4_C1192	Q6WKZ4	VANCSLGTATIISENLNNEVMMK	VANC*SLGTATIISENLNNEVMMK	C	-0.0180544		Missed Filter (-0.0180544181158952; )	4.48897e+06	4433147	8.92212e+06
Q9C0C9_C400	Q9C0C9	IMSCSPDTQCSR	IMSC*SPDTQCSR	C	-0.0183045		Missed Filter (-0.0183045002700494; )	1.06003e+07	1.04975e+07	2.10978e+07
Q5VYS8_C690	Q5VYS8	NSVLAQGPGATSSAANTCK	NSVLAQGPGATSSAANTC*K	C	-0.0184653		Missed Filter (-0.0184652927613208; )	7986740	7885168	15871908
P16615_C349	P16615	SLPSVETLGCTSVICSDK	SLPSVETLGCTSVIC*SDK	C	-0.0186946		Missed Filter (-0.0186946427004868; )	3639923	3.59306e+06	7.23298e+06
Q9UPY3_C1621	Q9UPY3	NLSVSCAAASVASSR	NLSVSC*AAASVASSR	C	0.0187643		Missed Filter (0.0187642874625547; )	1.36025e+07	13783387	2.73859e+07
P37287_C28	P37287	VSPGSLYTCR	VSPGSLYTC*R	C	0.0189191		Missed Filter (0.0189191005713451; )	50234244	50897248	101131492
P20810_C408	P20810	AAAPAPVSEAVCR	AAAPAPVSEAVC*R	C	0.0189876		Missed Filter (0.018987642858219; )	75506212	76505948	152012160
Q9NVP2_C189	Q9NVP2	GLGLPGCIPGLLPENSMDCI	GLGLPGC*IPGLLPENSMDCI	C	0.0192792		Missed Filter (0.0192791933843281; )	1.92888e+06	1.95483e+06	3.88371e+06
Q5JVS0_C236	Q5JVS0	TEDNMGGCGVR	TEDNMGGC*GVR	C	-0.0193421		Missed Filter (-0.0193420859617039; )	21042441	20763204	41805645
Q69YH5_C280	Q69YH5	VADCVVGK	VADC*VVGK	C	0.0201408		Missed Filter (0.0201408406986873; )	985017	998865	1.98388e+06
O95197_C390	O95197	TPVCSIDGSTPITK	TPVC*SIDGSTPITK	C	-0.0201861		Missed Filter (-0.0201860763186217; )	1.8428e+07	18171992	3.66e+07
Q96GP6_C530	Q96GP6	VVVAHHDLDNTLNCSFLEPPSGLEQPSPSWSSR	VVVAHHDLDNTLNC*SFLEPPSGLEQPSPSWSSR	C	-0.0204952		Missed Filter (-0.0204951691031851; )	1.63351e+06	1.61047e+06	3.24398e+06
Q96IZ6_C126	Q96IZ6	SEVPECR	SEVPEC*R	C	0.0206767		Missed Filter (0.0206766719889661; )	6249700	6.33992e+06	1.25896e+07
Q70E73_C1045	Q70E73	LNLSGVNLPGVLQQGCVSAK	LNLSGVNLPGVLQQGC*VSAK	C	0.0213455		Missed Filter (0.0213455035338505; )	3.6182e+06	3.67213e+06	7.29033e+06
Q16611_C14	Q16611	QECGEPALPSASEEQVAQDTEEVFR	QEC*GEPALPSASEEQVAQDTEEVFR	C	-0.0231717		Missed Filter (-0.0231716917232442; )	2.03696e+06	2.0045e+06	4.04146e+06
Q9HBH5_C97	Q9HBH5	QAAECGPEPGVSGVGELIVR	QAAEC*GPEPGVSGVGELIVR	C	0.0234706		Missed Filter (0.0234706204406955; )	31805140	32326796	64131936
Q8N6M3_C251	Q8N6M3	AFSPGLPPQSCSLNLK	AFSPGLPPQSC*SLNLK	C	-0.0235558		Missed Filter (-0.0235557938470773; )	58054848	57114648	115169496
Q5JSZ5_C819	Q5JSZ5	AQADFDSCISSQR	AQADFDSC*ISSQR	C	0.0239809		Missed Filter (0.0239808916860128; )	1.22689e+07	1.24746e+07	2.47435e+07
Q15631_C225	Q15631	ETAAACVEK	ETAAAC*VEK	C	-0.0248998		Missed Filter (-0.0248997567831161; )	39018069	38352086	77370155
Q92667_C464	Q92667	DSKPNISAHHISLASCLALTTPSEELPDR	DSKPNISAHHISLASC*LALTTPSEELPDR	C	0.0257045		Missed Filter (0.0257044941141768; )	5.24987e+06	5.34395e+06	1.05938e+07
Q8N6M0_C292	Q8N6M0	LVNIVTENCS	LVNIVTENC*S	C	0.025922		Missed Filter (0.0259220434153725; )	11113839	11315335	22429174
Q9Y2G8_C726	Q9Y2G8	TVEEEEAIGSCSDVDSSLYLGESR	TVEEEEAIGSC*SDVDSSLYLGESR	C	0.026229		Missed Filter (0.0262290251089707; )	2.56513e+07	26120911	5.17722e+07
P61289_C92	P61289	RLDECEEAFQGTK	RLDEC*EEAFQGTK	C	-0.0269276		Missed Filter (-0.0269276057031763; )	2.84024e+06	2.78772e+06	5.62795e+06
Q8WYP5_C1412	Q8WYP5	DLLVAAEAFSELNHLSPVQGTEASLCAPSVYEGK	DLLVAAEAFSELNHLSPVQGTEASLC*APSVYEGK	C	0.02711		Missed Filter (0.0271100090226603; )	3.44937e+07	3.51716e+07	6.96653e+07
Q96BY7_C1750	Q96BY7	KSPGADVTCSLPR	KSPGADVTC*SLPR	C	-0.0274053		Missed Filter (-0.0274053421902355; )	2898899	2.84435e+06	5.74325e+06
Q6P2E9_C838	Q6P2E9	ETCSTLAESPR	ETC*STLAESPR	C	0.0282616		Missed Filter (0.0282616093610222; )	10989688	11212715	22202403
Q13111_C190	Q13111	TEEEGVGCGGAGR	TEEEGVGC*GGAGR	C	-0.0286755		Missed Filter (-0.0286755300570947; )	6.02128e+06	5.90303e+06	1.19243e+07
Q99614_C8	Q99614	SENCGVPEDLLNGLK	SENC*GVPEDLLNGLK	C	0.0289039		Missed Filter (0.0289038927945282; )	44667937	45571838	90239775
Q9NUL3_C491	Q9NUL3	GSSPTPPCSPVQPSK	GSSPTPPC*SPVQPSK	C	-0.0289295		Missed Filter (-0.0289295128913546; )	9469690	9281691	18751381
Q6ULP2_C250	Q6ULP2	IQLEEIECAVLNDR	IQLEEIEC*AVLNDR	C	-0.0289621		Missed Filter (-0.0289621499601108; )	1.07239e+06	1.05108e+06	2.12347e+06
Q96KB5_C22	Q96KB5	SVLCSTPTINIPASPFMQK	SVLC*STPTINIPASPFMQK	C	-0.0297488		Missed Filter (-0.0297488213707149; )	4.15362e+06	4.06885e+06	8222469
Q99961_C277	Q99961	EPFDLGEPEQSNGGFPCTTAPK	EPFDLGEPEQSNGGFPC*TTAPK	C	-0.0302056		Missed Filter (-0.0302056281189301; )	18259422	17881100	36140522
Q9H410_C355	Q9H410	LQLQNPPAIHGSGSGSCQ	LQLQNPPAIHGSGSGSC*Q	C	-0.0302809		Missed Filter (-0.0302808838522639; )	4943816	4841131	9784947
O75330_C719	O75330	APMECQESWK	APMEC*QESWK	C	0.0304274		Missed Filter (0.0304273913109859; )	4621137	4.71962e+06	9.34076e+06
Q13480_C360	Q13480	SPVETCSIPR	SPVETC*SIPR	C	-0.0304508		Missed Filter (-0.0304507652276831; )	4.40661e+06	4.29465e+06	8.70126e+06
Q92888_C911	Q92888	LRPLLSQLGGNSVPQPGCT	LRPLLSQLGGNSVPQPGC*T	C	-0.0305672		Missed Filter (-0.0305671900768275; )	9492815	9293801	18786616
Q9NUQ3_C101	Q9NUQ3	NLVSPAYCTQESR	NLVSPAYC*TQESR	C	0.0307215		Missed Filter (0.0307215244444116; )	29403319	32416311	5.94264e+07
O75410_C78	O75410	ESCDPSLGLAGPGAK	ESC*DPSLGLAGPGAK	C	-0.0307736		Missed Filter (-0.0307736095016453; )	1.56824e+07	15351129	3.10336e+07
Q8NBU5_C359	Q8NBU5	SKDAAFQNVLTHVCLD	SKDAAFQNVLTHVC*LD	C	0.0308166		Missed Filter (0.0308166369979331; )	1.34586e+06	1.37492e+06	2.72078e+06
Q96G28_C138	Q96G28	NGVLPDCLTDGSDVVSDLEHEEMK	NGVLPDC*LTDGSDVVSDLEHEEMK	C	-0.0317035		Missed Filter (-0.0317034900567874; )	750675	734359	1.48503e+06
Q86XL3_C203	Q86XL3	EPPLYYGVCPVYEDVPAR	EPPLYYGVC*PVYEDVPAR	C	0.0318344		Missed Filter (0.0318344464611804; )	2.43735e+06	2491733	4.92909e+06
Q8NBF2_C716	Q8NBF2	AILFSQPLQITDTQQGCIAPVELR	AILFSQPLQITDTQQGC*IAPVELR	C	-0.0320656		Missed Filter (-0.0320656034923396; )	2377926	3.08377e+06	4.70358e+06
P82094_C158	P82094	DSSLCVSGETLAAGTSSPK	DSSLC*VSGETLAAGTSSPK	C	0.0324097		Missed Filter (0.0324096758124194; )	5837721	5.97035e+06	1.18081e+07
Q15334_C1059	Q15334	NLAEDEAHACAILIK	NLAEDEAHAC*AILIK	C	-0.0329093		Missed Filter (-0.0329093049112646; )	9616648	9399766	19016414
Q96HC4_C213	Q96HC4	QPTVTSVCSETSQELAEGQR	QPTVTSVC*SETSQELAEGQR	C	0.0337854		Missed Filter (0.0337854271704824; )	9170207	9387492	18557699
O75940_C214	O75940	VGVGTCGIADKPMTQYQDTSK	VGVGTC*GIADKPMTQYQDTSK	C	0.033861		Missed Filter (0.0338610260479041; )	6109254	6254338	12363592
Q9NSV4_C1158	Q9NSV4	EACNVESNR	EAC*NVESNR	C	0.0342469		Missed Filter (0.0342468546105758; )	7.23209e+06	7405824	1.46379e+07
Q9C0D5_C1808	Q9C0D5	CQIPVHSQENR	C*QIPVHSQENR	C	0.0360567		Missed Filter (0.0360567041659032; )	4391305	4502438	8893743
Q96JH7_C1178	Q96JH7	SGSLQTGLPESFPLTGGTENLNTETTDGCVADALGAAFATR	SGSLQTGLPESFPLTGGTENLNTETTDGC*VADALGAAFATR	C	0.0361493		Missed Filter (0.0361492923637356; )	1.98201e+06	2.03231e+06	4.01432e+06
Q9NZN5_C294	Q9NZN5	TDCSSGDASRPSSDNADSPK	TDC*SSGDASRPSSDNADSPK	C	0.0362786		Missed Filter (0.0362786039776013; )	2.25076e+06	2308077	4.55884e+06
Q9NUQ8_C102	Q9NUQ8	ITENYDCGTK	ITENYDC*GTK	C	-0.0365221		Missed Filter (-0.0365221365097571; )	8652836	8436537	17089373
Q96JA1_C1066	Q96JA1	ACDASPESTPLTGQLPGK	AC*DASPESTPLTGQLPGK	C	-0.0372944		Missed Filter (-0.03729441097889; )	16314721	15898382	32213103
Q12830_C1241	Q12830	AKEGCQSDSMR	AKEGC*QSDSMR	C	-0.0374281		Missed Filter (-0.0374281056616734; )	1.81879e+06	1.77221e+06	3.591e+06
Q9HB90_C52	Q9HB90	DFGYGVEEEEEEAAAAGGGVGAGAGGGCGPGGADSSKPR	DFGYGVEEEEEEAAAAGGGVGAGAGGGC*GPGGADSSKPR	C	-0.0376328		Missed Filter (-0.0376327751857134; )	5782329	6.4877e+06	11415776
P07814_C692	P07814	GFFICDQPYEPVSPYSCK	GFFICDQPYEPVSPYSC*K	C	0.0379126		Missed Filter (0.0379125879647579; )	15508428	15921510	31429938
Q7Z2K8_C221	Q7Z2K8	VDPLCSSK	VDPLC*SSK	C	-0.0392732		Missed Filter (-0.0392732098816276; )	9203713	8956548	18160261
Q8TF05_C566	Q8TF05	SDLQDELDINELPNCK	SDLQDELDINELPNC*K	C	0.0396838		Missed Filter (0.0396838281263667; )	2.63704e+06	2710584	5.34762e+06
Q14153_C87	Q14153	EAVTACAVTSLIK	EAVTAC*AVTSLIK	C	-0.0396974		Missed Filter (-0.0396974210939646; )	1.10233e+06	1.07242e+06	2.17475e+06
Q8NDV7_C427	Q8NDV7	VSGGSTHGTWGSLQETCESEVSGTQK	VSGGSTHGTWGSLQETC*ESEVSGTQK	C	0.0398912		Missed Filter (0.0398912263381482; )	3.0155e+06	3.0987e+06	6.11419e+06
Q6ZWJ1_C165	Q6ZWJ1	TNNDILSSCEIK	TNNDILSSC*EIK	C	0.0408509		Missed Filter (0.0408509158766963; )	8.73963e+06	8991276	1.77309e+07
Q9Y2Y0_C149	Q9Y2Y0	GLDLSSGLVVTSLCK	GLDLSSGLVVTSLC*K	C	0.0409372		Missed Filter (0.0409371529658761; )	911620	937858	1.84948e+06
Q5VV42_C109	Q5VV42	ITENASDADLWLLNSCTVK	ITENASDADLWLLNSC*TVK	C	0.0414321		Missed Filter (0.0414320618407022; )	6532549	6722874	13255423
Q9NZN8_C175	Q9NZN8	SSPSIICMPK	SSPSIIC*MPK	C	-0.0414391		Missed Filter (-0.0414390543151748; )	2.21333e+06	2.15066e+06	4.36399e+06
P54132_C120	P54132	EVVCTTQNTPTVK	EVVC*TTQNTPTVK	C	0.0415896		Missed Filter (0.0415896415589758; )	2.29218e+06	2359224	4.65141e+06
Q6NXT6_C562	Q6NXT6	FTICGNR	FTIC*GNR	C	0.0416264		Missed Filter (0.0416263527168499; )	20747295	2.1354e+07	4.21013e+07
Q9Y520_C620	Q9Y520	QESENSCNKEEEPVFTR	QESENSC*NKEEEPVFTR	C	-0.0418843		Missed Filter (-0.0418842533515453; )	7.5614e+06	7.3451e+06	14906496
Q16643_C613	Q16643	EGTQASEGYFSQSQEEEFAQSEELCAK	EGTQASEGYFSQSQEEEFAQSEELC*AK	C	0.0431415		Missed Filter (0.0431414586029512; )	13652708	14067136	27719844
Q92667_C147	Q92667	SIPLECPLSSPK	SIPLEC*PLSSPK	C	0.0436244		Missed Filter (0.0436243762654274; )	32224913	33212050	65436963
P15924_C57	P15924	GVITDQNSDGYCQTGTMSR	GVITDQNSDGYC*QTGTMSR	C	-0.0437374		Missed Filter (-0.0437373678885394; )	1.16955e+07	11346327	2.30418e+07
O15069_C26	O15069	TDLSCDAAAATTILGGDR	TDLSC*DAAAATTILGGDR	C	0.0438617		Missed Filter (0.043861728743855; )	4.66454e+06	4.80859e+06	9.47313e+06
Q9UQR1_C14	Q9UQR1	CGGIDEMQSSR	C*GGIDEMQSSR	C	-0.0444062		Missed Filter (-0.0444062152327453; )	2.89311e+06	2.80257e+06	5.69567e+06
Q96F46_C632	Q96F46	EPGSQACLAIDPLVGEEGGAAVAK	EPGSQAC*LAIDPLVGEEGGAAVAK	C	0.0458296		Missed Filter (0.045829637262231; )	604519	624031	1.22855e+06
P00492_C106	P00492	LKSYCNDQSTGDIK	LKSYC*NDQSTGDIK	C	-0.0462067		Missed Filter (-0.0462067400944183; )	3.39669e+06	3.28962e+06	6.68632e+06
Q8IZ21_C328	Q8IZ21	STCSMGSELLPMISPR	STC*SMGSELLPMISPR	C	0.0472521		Missed Filter (0.0472520773855278; )	1.79065e+06	1.85027e+06	3.64093e+06
Q96T17_C732	Q96T17	NLIEGFNSPGQETPLNTFC	NLIEGFNSPGQETPLNTFC*	C	-0.0472793		Missed Filter (-0.0472792784207567; )	697500	675013	1.37251e+06
Q96F24_C155	Q96F24	SEPAEPCIGSK	SEPAEPC*IGSK	C	-0.048077		Missed Filter (-0.0480769821862304; )	10565212	10218934	20784146
Q9NXE4_C698	Q9NXE4	QLPDCIVGEDGLILTPLGR	QLPDC*IVGEDGLILTPLGR	C	0.0481497		Missed Filter (0.0481497473108921; )	3.54684e+06	3667210	7.21405e+06
Q9UKK3_C1488	Q9UKK3	LPMASALPEALCSQSR	LPMASALPEALC*SQSR	C	-0.0483701		Missed Filter (-0.0483701324752322; )	1.04821e+06	1.01365e+06	2.06186e+06
Q8NC96_C162	Q8NC96	LCIGNITNK	LC*IGNITNK	C	0.048459		Missed Filter (0.0484589914711266; )	1.05707e+07	1.09317e+07	21502392
Q9BTW9_C1192	Q9BTW9	LCDLLGVPRPQLVPQPGAC	LCDLLGVPRPQLVPQPGAC*	C	-0.0488659		Missed Filter (-0.048865876037169; )	1446190	1398026	2844216
Q9Y314_C8	Q9Y314	NCTAGAVYTYHEK	NC*TAGAVYTYHEK	C	0.0491918		Missed Filter (0.0491918078732509; )	5408490	5.59608e+06	1.10046e+07
P52429_C415	P52429	DCLVQECK	DC*LVQECK	C	-0.0494942		Missed Filter (-0.0494942049149273; )	7.47264e+06	4.26962e+06	8.68826e+06
O60343_C316	O60343	CSSVTGVQR	C*SSVTGVQR	C	0.0511803		Missed Filter (0.0511802796262972; )	3.2806e+06	3.39886e+06	6.67946e+06
P46013_C1843	P46013	ELFQTPCTDNPTTDEK	ELFQTPC*TDNPTTDEK	C	0.0517929		Missed Filter (0.0517929244152811; )	3.03972e+06	3.15083e+06	6190552
P61758_C113	P61758	FLLADNLYCK	FLLADNLYC*K	C	0.0520974		Missed Filter (0.0520974221429249; )	22079227	22891084	44970311
Q9Y6A5_C20	Q9Y6A5	NTENCDFLFSPPEVTGR	NTENC*DFLFSPPEVTGR	C	0.0536641		Missed Filter (0.0536640946855684; )	2.09983e+06	2.1794e+06	4.27923e+06
P04183_C230	P04183	LFAPQQILQCSPAN	LFAPQQILQC*SPAN	C	0.0544873		Missed Filter (0.0544872834579359; )	6.5382e+07	6.85624e+07	1.3328e+08
P78559_C2191	P78559	SAPCGSLAFSGDR	SAPC*GSLAFSGDR	C	-0.0549377		Missed Filter (-0.0549376928722828; )	13167716	12675795	25843511
Q92615_C590	Q92615	EPSVPASCAVSATYER	EPSVPASC*AVSATYER	C	0.0551875		Missed Filter (0.0551874556333961; )	130972771	136079635	267052406
P41440_C220	P41440	CETSASELER	C*ETSASELER	C	0.0563822		Missed Filter (0.056382208627684; )	1.36845e+06	1.42299e+06	2791434
Q5VZ89_C1211	Q5VZ89	EDVETGLDPLSLLATECTGGK	EDVETGLDPLSLLATEC*TGGK	C	0.056469		Missed Filter (0.0564689870909627; )	5.58444e+06	5.80703e+06	11391474
Q9UHI6_C524	Q9UHI6	SHSECGIIEK	SHSEC*GIIEK	C	-0.0567853		Missed Filter (-0.0567852971409283; )	2.02104e+07	1.94302e+07	3.96406e+07
Q8IWC1_C315	Q8IWC1	ASVDAPPQVNVEVFCNTSMEASPK	ASVDAPPQVNVEVFC*NTSMEASPK	C	-0.0572103		Missed Filter (-0.0572103486585131; )	11169173	10734924	21904097
P98170_C12	P98170	TCVPADINKEEEFVEEFNR	TC*VPADINKEEEFVEEFNR	C	0.0572541		Missed Filter (0.0572540519427175; )	3.96447e+06	4124961	8.08943e+06
Q8NDI1_C672	Q8NDI1	TSGSDDPGICSNTDSTQAQVLLGK	TSGSDDPGIC*SNTDSTQAQVLLGK	C	0.0577379		Missed Filter (0.0577379431037284; )	3481414	3.62357e+06	7.10498e+06
O75179_C1622	O75179	ISSCSDESSNSNSSR	ISSC*SDESSNSNSSR	C	-0.0584628		Missed Filter (-0.0584627541484106; )	4683101	4497120	9180221
Q5UIP0_C1155	Q5UIP0	SSLSNNECGSLDK	SSLSNNEC*GSLDK	C	-0.0589078		Missed Filter (-0.0589077845338533; )	7666177	7359458	15025635
Q9UL33_C140	Q9UL33	AFDNMVTSMMIQVC	AFDNMVTSMMIQVC*	C	0.0589176		Missed Filter (0.0589175738064054; )	1.8987e+06	1977847	3.87655e+06
P04035_C883	P04035	INLQDLQGACTK	INLQDLQGAC*TK	C	-0.0589198		Missed Filter (-0.0589197876568996; )	6043704	5801851	11845555
P0DP91_C61	P0DP91	SVGDGLSTSAVGCASAAPR	SVGDGLSTSAVGC*ASAAPR	C	0.059133		Missed Filter (0.0591330140175226; )	2599997	2.70878e+06	5.30878e+06
Q9NQE9_C16	Q9NQE9	SAGLAPDCEASATAETTVSSVGTCEAAGK	SAGLAPDC*EASATAETTVSSVGTCEAAGK	C	-0.0593697		Missed Filter (-0.0593696964015621; )	1.30514e+07	12525188	2.55766e+07
P52597_C267	P52597	DLSYCLSGMYDHR	DLSYC*LSGMYDHR	C	0.059505		Missed Filter (0.0595050472551182; )	2.29081e+06	2387268	4.67807e+06
Q9UBB4_C354	Q9UBB4	ETTNIFSNCGCVR	ETTNIFSNC*GCVR	C	0.0597151		Missed Filter (0.0597151194721283; )	16312116	17001464	33313580
Q14151_C224	Q14151	ILDILGETCK	ILDILGETC*K	C	0.0599484		Missed Filter (0.0599484040826631; )	25793100	26887087	52680187
Q9Y508_C8	Q9Y508	DCGGAAQLAGPAAEADPLGR	DC*GGAAQLAGPAAEADPLGR	C	0.060107		Missed Filter (0.0601069634988411; )	22053216	22991426	45044642
Q04637_C662	Q04637	LQGINCGPDFTPSFANLGR	LQGINC*GPDFTPSFANLGR	C	-0.060945		Missed Filter (-0.0609449971642186; )	20855036	19992388	40847424
Q99704_C463	Q99704	SGASGSWDCGLSR	SGASGSWDC*GLSR	C	0.0612563		Missed Filter (0.0612563085036625; )	1.79584e+06	1.87373e+06	3669569
O95685_C26	O95685	SLSCLSDLDGGVALEPR	SLSC*LSDLDGGVALEPR	C	0.0616415		Missed Filter (0.0616414722396381; )	824794	860798	1.68559e+06
Q13371_C35	Q13371	CAPASSSVPAEAELAGEGISVNTGPK	C*APASSSVPAEAELAGEGISVNTGPK	C	-0.0617371		Missed Filter (-0.0617371016228772; )	4.57231e+06	4.38078e+06	8953088
A6NDU8_C244	A6NDU8	YCADQQPENHEVDTSVSGAGCTTYKEPLDFR	YCADQQPENHEVDTSVSGAGC*TTYKEPLDFR	C	0.0619272		Missed Filter (0.0619271883929371; )	6686019	6979263	13665282
P11413_C13	P11413	TQVCGILR	TQVC*GILR	C	-0.0625383		Missed Filter (-0.0625382620790249; )	8846397	8471114	17317511
P52732_C450	P52732	VTELFMDNKNELDQCK	VTELFMDNKNELDQC*K	C	-0.0632108		Missed Filter (-0.0632108477362289; )	4870241	4.66146e+06	9.5317e+06
Q9Y4E8_C264	Q9Y4E8	NSNYCLPSYTAYK	NSNYC*LPSYTAYK	C	-0.0633969		Missed Filter (-0.0633968989969153; )	13047668	12503179	25550847
Q8N0X7_C499	Q8N0X7	VSQFLVDGVCTVANCVGK	VSQFLVDGVC*TVANCVGK	C	0.063623		Missed Filter (0.0636230190519172; )	12707076	13279999	25987075
P51617_C608	P51617	SWHLTPSCPLDPAPLR	SWHLTPSC*PLDPAPLR	C	-0.0638205		Missed Filter (-0.06382046968864; )	1.88015e+06	1.79879e+06	3.67894e+06
Q92538_C661	Q92538	SGCSDLEEAVDSGADKK	SGC*SDLEEAVDSGADKK	C	0.0648452		Missed Filter (0.0648452043215674; )	13687809	14317074	28004883
O75643_C238	O75643	CTLSANLVASGELMSSK	C*TLSANLVASGELMSSK	C	0.0649802		Missed Filter (0.0649801898237992; )	2630037	2.7512e+06	5.38124e+06
P53794_C609	P53794	GLQPEDVNLLVTCR	GLQPEDVNLLVTC*R	C	-0.0654768		Missed Filter (-0.0654768431843481; )	3.69472e+06	3.53078e+06	7.22551e+06
Q6ZSR9_C251	Q6ZSR9	GSCLESGGHSNDR	GSC*LESGGHSNDR	C	-0.0656996		Missed Filter (-0.0656995706951921; )	3.51577e+06	3359255	6.87503e+06
O75044_C1020	O75044	SASTAGDIACAFRPVK	SASTAGDIAC*AFRPVK	C	-0.0662611		Missed Filter (-0.0662610866086432; )	5086951	4858598	9945549
O15371_C19	O15371	FMTPVIQDNPSGWGPCAVPEQFR	FMTPVIQDNPSGWGPC*AVPEQFR	C	0.0669245		Missed Filter (0.0669244865221259; )	1.47762e+06	1.54778e+06	3025409
P46109_C249	P46109	VPCAYDK	VPC*AYDK	C	-0.0669694		Missed Filter (-0.0669693691671051; )	8157780	7.78775e+06	1.59455e+07
Q08AD1_C512	Q08AD1	SCVPLNTNELNSNENIHYK	SC*VPLNTNELNSNENIHYK	C	0.0681076		Missed Filter (0.0681076242250058; )	2.71457e+06	2.84579e+06	5.56036e+06
Q96R06_C382	Q96R06	DAAIGTTPFSTCSVGTWFTPSAPQEK	DAAIGTTPFSTC*SVGTWFTPSAPQEK	C	0.0686482		Missed Filter (0.0686481580513692; )	2.81247e+06	2.94713e+06	5.75959e+06
Q9Y520_C223	Q9Y520	IACGPPQAK	IAC*GPPQAK	C	0.0688973		Missed Filter (0.0688973196570976; )	15330959	16080867	31411826
Q04721_C2085	Q04721	LLDEYNVTPSPPGTVLTSALSPVICGPNR	LLDEYNVTPSPPGTVLTSALSPVIC*GPNR	C	-0.068972		Missed Filter (-0.0689720015675274; )	2574500	2.45431e+06	5.02881e+06
Q8NBR6_C79	Q8NBR6	SLPDSASPAGSPEVPGPCSSSAGLDLK	SLPDSASPAGSPEVPGPC*SSSAGLDLK	C	0.0700856		Missed Filter (0.0700855581724793; )	2.13762e+06	2244030	4.38165e+06
Q9NZN5_C1325	Q9NZN5	TGTGDIATCYSPR	TGTGDIATC*YSPR	C	0.0703602		Missed Filter (0.0703602360560195; )	8309345	8.72457e+06	1.70339e+07
Q9UMZ2_C208	Q9UMZ2	FLVSCDISTSGQEQIK	FLVSC*DISTSGQEQIK	C	0.07096		Missed Filter (0.0709599681123314; )	2.18174e+06	2.29173e+06	4.47348e+06
Q6PJW8_C439	Q6PJW8	SKTEPLISPGCDR	SKTEPLISPGC*DR	C	0.0710729		Missed Filter (0.071072936166179; )	3650641	3.83499e+06	7.48563e+06
Q9C0C2_C1175	Q9C0C2	NLEVSSCVGSGGSSEAR	NLEVSSC*VGSGGSSEAR	C	-0.0712666		Missed Filter (-0.0712665856854226; )	11794774	11226290	23021064
Q9H773_C162	Q9H773	KYTELPHGAISEDQAVGPADIPCDSTGQTST	KYTELPHGAISEDQAVGPADIPC*DSTGQTST	C	0.0712869		Missed Filter (0.0712868963370154; )	3.7919e+06	3.98398e+06	7775878
Q8IWC1_C505	Q8IWC1	WSSSPENACGLPSPISTNR	WSSSPENAC*GLPSPISTNR	C	0.0713702		Missed Filter (0.0713702127159421; )	17506918	18394766	35901684
Q9BU02_C228	Q9BU02	ERPQETEDPDHCLG	ERPQETEDPDHC*LG	C	-0.0719283		Missed Filter (-0.0719283398106086; )	3.90437e+06	3.71448e+06	7.61885e+06
O95210_C108	O95210	EVCDNSR	EVC*DNSR	C	0.0723587		Missed Filter (0.0723586750221758; )	22970200	24151656	47121856
Q9BV38_C384	Q9BV38	TEQLQAVLCSTMEK	TEQLQAVLC*STMEK	C	-0.0733876		Missed Filter (-0.0733875663947498; )	1.91968e+06	1.82447e+06	3.74414e+06
Q8TBM8_C178	Q8TBM8	QYDLTGNEEQACNHQNNGR	QYDLTGNEEQAC*NHQNNGR	C	0.0738249		Missed Filter (0.0738248980590964; )	1.00421e+07	1.22863e+07	2.06115e+07
Q8N0X7_C504	Q8N0X7	VSQFLVDGVCTVANCVGK	VSQFLVDGVCTVANC*VGK	C	0.073881		Missed Filter (0.0738810313499912; )	7399407	7788204	15187611
Q8N2K0_C34	Q8N2K0	CAAAGSSSSGSAAAALDADCR	CAAAGSSSSGSAAAALDADC*R	C	0.0742449		Missed Filter (0.0742448541267719; )	2.37016e+07	2.49533e+07	4.86549e+07
P19634_C794	P19634	CLSDPGPHPEPGEGEPFFPK	C*LSDPGPHPEPGEGEPFFPK	C	-0.0743951		Missed Filter (-0.0743951273829617; )	1750848	1.66285e+06	3.4137e+06
Q5VV42_C6	Q5VV42	PSASCDTLLDDIEDIVSQEDSKPQDR	PSASC*DTLLDDIEDIVSQEDSKPQDR	C	0.0746739		Missed Filter (0.0746738680626248; )	10669182	11235505	21904687
Q6Y7W6_C938	Q6Y7W6	LPSSSTWGQQSNTTACQSQATLSLAEIQK	LPSSSTWGQQSNTTAC*QSQATLSLAEIQK	C	0.0761405		Missed Filter (0.0761404722572305; )	10341266	1.09002e+07	2.12415e+07
O76080_C76	O76080	ADTSLNNCEGAAGSTSEK	ADTSLNNC*EGAAGSTSEK	C	-0.0763687		Missed Filter (-0.0763686612073951; )	11980352	11362668	23343020
Q86Y37_C362	Q86Y37	AGDELAYNSSSACASSR	AGDELAYNSSSAC*ASSR	C	0.0781446		Missed Filter (0.0781446169823201; )	9769758	1.15343e+07	20083296
O60826_C369	O60826	TLGVSFVQAESECR	TLGVSFVQAESEC*R	C	-0.0786969		Missed Filter (-0.0786969348434134; )	4713731	4463491	9177222
Q15398_C811	Q15398	SLTTECHLLDSPGLNCSNPFTQLER	SLTTECHLLDSPGLNC*SNPFTQLER	C	0.0796626		Missed Filter (0.0796625913313399; )	3.22146e+06	3.40418e+06	6.62564e+06
Q12955_C4321	Q12955	LIIEETKPCVPVSMK	LIIEETKPC*VPVSMK	C	0.0802823		Missed Filter (0.0802822678629976; )	4784848	5.05866e+06	9.84351e+06
Q86Y37_C94	Q86Y37	SCDAAAAVAK	SC*DAAAAVAK	C	0.0803218		Missed Filter (0.0803217970235588; )	2663866	2.81638e+06	5.48025e+06
Q8WW01_C13	Q8WW01	GDSEPTPGCSGLGPGGVR	GDSEPTPGC*SGLGPGGVR	C	0.0804536		Missed Filter (0.0804535530703973; )	20798550	21991356	42789906
Q9UPY3_C1122	Q9UPY3	SFISISNSSSAENDNYCK	SFISISNSSSAENDNYC*K	C	-0.0805247		Missed Filter (-0.0805246911978691; )	2.69093e+06	2544848	5.23578e+06
P51957_C466	P51957	LECSGTILAHSNLR	LEC*SGTILAHSNLR	C	0.0806303		Missed Filter (0.0806303475253632; )	1.94344e+06	2.05514e+06	3998579
Q8IX90_C290	Q8IX90	SDAEYTNSPLVPTFCTPGLK	SDAEYTNSPLVPTFC*TPGLK	C	0.0812967		Missed Filter (0.0812966695125275; )	7.53255e+06	7969203	1.55018e+07
Q9H2C2_C30	Q9H2C2	GNVDGVAATPTAASASCQYR	GNVDGVAATPTAASASC*QYR	C	-0.0815452		Missed Filter (-0.0815451670359802; )	13957624	13190582	27148206
Q9UQ35_C1029	Q9UQ35	SKDSLVQSCPGSLSLCAGVK	SKDSLVQSC*PGSLSLCAGVK	C	0.0820597		Missed Filter (0.0820596570846798; )	6.6224e+06	7.00793e+06	1.36303e+07
Q92620_C27	Q92620	LEGTDLDCQVGGLICK	LEGTDLDCQVGGLIC*K	C	0.0823104		Missed Filter (0.082310358407317; )	1.26665e+06	1.34101e+06	2607659
O15037_C157	O15037	LSWDFTPGPSSGASQCTGVLR	LSWDFTPGPSSGASQC*TGVLR	C	0.0823526		Missed Filter (0.0823525935283216; )	1.33184e+06	1.41007e+06	2.74191e+06
P22681_C567	P22681	RPLPCTPGDCPSR	RPLPC*TPGDCPSR	C	0.0831378		Missed Filter (0.0831377791327542; )	6.3294e+06	6704856	1.30343e+07
O14965_C8	O14965	SKENCISGPVK	SKENC*ISGPVK	C	0.0833836		Missed Filter (0.0833835591409964; )	9463614	10026699	19490313
Q6NXT6_C487	Q6NXT6	CKPSQGLSTEENLSASITK	C*KPSQGLSTEENLSASITK	C	0.0841333		Missed Filter (0.0841333419300581; )	71854929	76167243	148022172
Q86WB0_C406	Q86WB0	LCSSSSSDTSSR	LC*SSSSSDTSSR	C	-0.0848483		Missed Filter (-0.084848307646112; )	1.95343e+06	1.84186e+06	3795296
Q15464_C392	Q15464	HGSPEFCGILGER	HGSPEFC*GILGER	C	-0.0850682		Missed Filter (-0.0850682084601381; )	1.25595e+06	1184036	2.43999e+06
Q8WU79_C196	Q8WU79	STAPVMDLLGLDAPVACSIANSK	STAPVMDLLGLDAPVAC*SIANSK	C	0.085453		Missed Filter (0.0854530083109646; )	10318029	10947644	21265673
P22102_C646	P22102	SSLQYSSPAPDGCGDQTLGDLLLTPTR	SSLQYSSPAPDGC*GDQTLGDLLLTPTR	C	0.0855845		Missed Filter (0.0855844586736692; )	2.65742e+06	3.5803e+06	5.47725e+06
Q9P246_C597	Q9P246	QWEVPDTASECDSLNSSIGR	QWEVPDTASEC*DSLNSSIGR	C	0.0865457		Missed Filter (0.0865457406563632; )	3.06211e+06	3.25142e+06	6.31353e+06
Q9BWL3_C97	Q9BWL3	LLQLETQGNQSCYNYLYR	LLQLETQGNQSC*YNYLYR	C	0.0869517		Missed Filter (0.0869517396885644; )	1705581	1811538	3517119
Q9BVS4_C367	Q9BVS4	NCLEESEGCYCR	NCLEESEGCYC*R	C	-0.0870918		Missed Filter (-0.0870917557930415; )	2.95933e+06	2785968	5.7453e+06
Q14C86_C568	Q14C86	FSLCSDNLEGISEGPSNR	FSLC*SDNLEGISEGPSNR	C	0.0874386		Missed Filter (0.087438561142376; )	7056550	7497458	14554008
O94901_C63	O94901	LATTACTLGDGEAVGADSGTSSAVSLK	LATTAC*TLGDGEAVGADSGTSSAVSLK	C	0.0881876		Missed Filter (0.0881876095316069; )	36649229	3.89593e+07	7.56085e+07
P52948_C1027	P52948	ADTSQEICSPR	ADTSQEIC*SPR	C	0.0882668		Missed Filter (0.0882667786311568; )	2.29067e+07	24350105	4.72568e+07
A1L020_C21	A1L020	NGGFGELGCFGGSAK	NGGFGELGC*FGGSAK	C	-0.0882696		Missed Filter (-0.08826963856089; )	1.24666e+06	1.17267e+06	2.41933e+06
Q9NV64_C29	Q9NV64	SALPSLQTLVGGGCGNGTGLR	SALPSLQTLVGGGC*GNGTGLR	C	0.088501		Missed Filter (0.0885010000450068; )	4659333	4954105	9613438
Q5JRA6_C1899	Q5JRA6	DEPPPASQSTSQDCSQALK	DEPPPASQSTSQDC*SQALK	C	0.0898804		Missed Filter (0.089880398711613; )	2.05031e+07	2.29291e+07	42323795
Q96CS3_C32	Q96CS3	LLQFQDLTGIESMDQCR	LLQFQDLTGIESMDQC*R	C	0.0899296		Missed Filter (0.0899295818312826; )	3.3063e+07	3.51894e+07	6.82524e+07
P50542_C11	P50542	ELVEAECGGANPLMK	ELVEAEC*GGANPLMK	C	-0.0905812		Missed Filter (-0.0905812286632464; )	9941976	9336950	19278926
O15067_C1338	O15067	NWTLEGSC	NWTLEGSC*	C	0.0908424		Missed Filter (0.0908423653840448; )	4.55928e+06	4.8556e+06	9414875
Q8ND82_C734	Q8ND82	STSTSEPTTGCSLK	STSTSEPTTGC*SLK	C	-0.0910451		Missed Filter (-0.0910450722679988; )	4834247	4538596	9372843
Q99996_C1012	Q99996	AENVQSCDTQVSSLLDGVVTMTSR	AENVQSC*DTQVSSLLDGVVTMTSR	C	-0.0914871		Missed Filter (-0.0914870758459171; )	2355727	2210979	4566706
Q96PD2_C725	Q96PD2	TDSCSSAQAQYDTPK	TDSC*SSAQAQYDTPK	C	0.0925368		Missed Filter (0.092536825032129; )	5646327	6020359	11666686
Q00535_C290	Q00535	ISAEEALQHPYFSDFCPP	ISAEEALQHPYFSDFC*PP	C	0.0928728		Missed Filter (0.0928727691048778; )	2.6984e+06	2877819	5.57622e+06
Q69YH5_C714	Q69YH5	AGTDSPVSCASVTEER	AGTDSPVSC*ASVTEER	C	-0.0936709		Missed Filter (-0.0936708650028979; )	2.55045e+06	2.39011e+06	4.94056e+06
Q9UKA8_C239	Q9UKA8	RPDPPTAALNEPQTFDCAL	RPDPPTAALNEPQTFDC*AL	C	0.0939448		Missed Filter (0.0939447509625299; )	1.2659e+06	1.35107e+06	2.61697e+06
A2VDJ0_C950	A2VDJ0	GKNCLPVNTPQSR	GKNC*LPVNTPQSR	C	0.0943801		Missed Filter (0.0943800866484611; )	8068958	8614473	16683431
Q15005_C26	Q15005	SGGSGGCSGAGGASNCGTGSGR	SGGSGGCSGAGGASNC*GTGSGR	C	0.0944399		Missed Filter (0.0944398504638918; )	16531454	17649820	34181274
P53384_C22	P53384	GASCQGCPNQR	GASC*QGCPNQR	C	-0.0948547		Missed Filter (-0.0948546847443213; )	3491842	3269644	6761486
Q9NPB0_C159	Q9NPB0	SAYSVFNPGCEAIQGTLTAEQLER	SAYSVFNPGC*EAIQGTLTAEQLER	C	0.094947		Missed Filter (0.0949470183345121; )	11741396	12540119	24281515
O43264_C568	O43264	LAPILCDGTATFVDLVPGFR	LAPILC*DGTATFVDLVPGFR	C	0.0950687		Missed Filter (0.0950686569234734; )	4.32007e+07	4.61434e+07	89344092
P49454_C142	P49454	SQQAAQSADVSLNPCNTPQK	SQQAAQSADVSLNPC*NTPQK	C	0.0950688		Missed Filter (0.0950687507419694; )	1.89192e+06	2.02079e+06	3.91271e+06
Q9NVC3_C30	Q9NVC3	LLQSPCVDTAPK	LLQSPC*VDTAPK	C	-0.0959224		Missed Filter (-0.0959223873800125; )	2.15414e+06	2.01557e+06	4169711
O75179_C210	O75179	LTSSVSCALDEAAAALTR	LTSSVSC*ALDEAAAALTR	C	0.0963166		Missed Filter (0.0963165595576104; )	1.13122e+06	1.20932e+06	2.34055e+06
Q9C0C9_C913	Q9C0C9	AEWPSETPVLCQQCGGKPGVTFTSAK	AEWPSETPVLCQQC*GGKPGVTFTSAK	C	0.0963279		Missed Filter (0.0963279260671805; )	5.5772e+06	5.96174e+06	1.15389e+07
P62834_C51	P62834	KQVEVDCQQCMLEILDTAGTEQFTAMR	KQVEVDCQQC*MLEILDTAGTEQFTAMR	C	0.0969683		Missed Filter (0.0969682806913868; )	910534	973838	1.88437e+06
O75882_C1428	O75882	KQQPPAQPGTCI	KQQPPAQPGTC*I	C	0.0989638		Missed Filter (0.0989637522861854; )	3.77512e+06	4.04317e+06	7.81829e+06
O95067_C106	O95067	GPSPTPEDVSMKEENLCQAFSDALLCK	GPSPTPEDVSMKEENLC*QAFSDALLCK	C	0.0994579		Missed Filter (0.0994579352983361; )	1.54451e+06	1.09859e+06	2.124e+06
A0MZ66_C550	A0MZ66	KLEGCTSSK	KLEGC*TSSK	C	0.099719		Missed Filter (0.0997190492206874; )	63488567	68030855	131519422
P35610_C92	P35610	SASLDNGGCALTTFSVLEGEK	SASLDNGGC*ALTTFSVLEGEK	C	0.0999527		Missed Filter (0.0999527169507158; )	13891058	1.48875e+07	2.87786e+07
O94830_C470	O94830	ESEFCSSSNTR	ESEFC*SSSNTR	C	0.100061		Missed Filter (0.100061181495205; )	1.50386e+07	1.61185e+07	3.11571e+07
Q7Z5L2_C40	Q7Z5L2	TGDEEESCGSPNSVVK	TGDEEESC*GSPNSVVK	C	0.100363		Missed Filter (0.100362535517558; )	5.78816e+06	6205154	1.19933e+07
Q12888_C101	Q12888	VADPVDSSNLDTCGSISQVIEQLPQPNR	VADPVDSSNLDTC*GSISQVIEQLPQPNR	C	0.100869		Missed Filter (0.100868769907476; )	7.77464e+06	8336596	1.61112e+07
O60566_C656	O60566	TSEDQQTACGTIYSQTLSIK	TSEDQQTAC*GTIYSQTLSIK	C	0.101425		Missed Filter (0.101425281585027; )	12468854	13376996	25845850
Q86UK7_C456	Q86UK7	LKDEDFPSLSASTSSSCSTAATPGPVGLALPYAIPAR	LKDEDFPSLSASTSSSC*STAATPGPVGLALPYAIPAR	C	-0.101505		Missed Filter (-0.10150535281562; )	3.10018e+06	2889551	5.98973e+06
Q8N8R5_C43	Q8N8R5	CSLSAEVR	C*SLSAEVR	C	0.101697		Missed Filter (0.101696976427489; )	3.15634e+06	3.38686e+06	6543202
Q86VP1_C675	Q86VP1	VPSWGLEDNVVCSQPAR	VPSWGLEDNVVC*SQPAR	C	-0.102791		Missed Filter (-0.102791007194118; )	893460	832017	1725477
Q12770_C914	Q12770	SRDSPGYDFSCLVQR	SRDSPGYDFSC*LVQR	C	0.102801		Missed Filter (0.102801181802917; )	4086672	4388499	8475171
P54687_C12	P54687	MKDCSNGCSAECTGEGGSK	MKDCSNGCSAEC*TGEGGSK	C	0.102891		Missed Filter (0.102890865381147; )	778668	836229	1.6149e+06
Q13370_C597	Q13370	YVSTSESDGTDCCSGK	YVSTSESDGTDC*CSGK	C	0.103013		Missed Filter (0.103012890153629; )	5.89269e+06	6.32884e+06	12221531
P46013_C1285	P46013	KADVEGELLACR	KADVEGELLAC*R	C	0.103247		Missed Filter (0.103246759785623; )	1.53997e+07	1.65421e+07	3.19418e+07
Q92692_C446	Q92692	TPYFDAGASCTEQEMPR	TPYFDAGASC*TEQEMPR	C	-0.103283		Missed Filter (-0.103282902883969; )	2.47177e+06	2.301e+06	4.77277e+06
O60870_C212	O60870	GACSSSGATSSK	GAC*SSSGATSSK	C	-0.103293		Missed Filter (-0.103293405711206; )	4903012	4.56708e+06	9.47009e+06
Q96GS4_C176	Q96GS4	SLDGLSEACGGAGSSGSAESGAGGGR	SLDGLSEAC*GGAGSSGSAESGAGGGR	C	0.103727		Missed Filter (0.103727428094313; )	1.43351e+07	1.53883e+07	29723408
Q9Y6E0_C394	Q9Y6E0	SQACGGNLGSIEELR	SQAC*GGNLGSIEELR	C	0.103797		Missed Filter (0.103797317409637; )	4771538	5127486	9899024
P49792_C220	P49792	EYLESLQCLESDK	EYLESLQC*LESDK	C	0.104337		Missed Filter (0.104336953649623; )	4.56995e+07	4.91268e+07	9.48263e+07
Q9P2B4_C352	Q9P2B4	TNGHCDPEIQTTR	TNGHC*DPEIQTTR	C	-0.104357		Missed Filter (-0.104356956060086; )	5353799	4980208	10334007
Q6ZPD9_C36	Q6ZPD9	LENKLPSGCTSR	LENKLPSGC*TSR	C	0.104755		Missed Filter (0.104754701065245; )	1.68603e+06	1.813e+06	3.49903e+06
Q8WVT3_C160	Q8WVT3	EVPGSEAARPEQEPPVAEPVPVCTIFSQR	EVPGSEAARPEQEPPVAEPVPVC*TIFSQR	C	0.105044		Missed Filter (0.105044143609867; )	7829686	8420099	16249785
O00124_C174	O00124	SQNLPKPLTEFPSPAEQPTCK	SQNLPKPLTEFPSPAEQPTC*K	C	0.105059		Missed Filter (0.105059178300086; )	22487095	24185714	46672809
P56589_C251	P56589	DGSKPLLCHYMMPDEETPLAVQACGLSPR	DGSKPLLCHYMMPDEETPLAVQAC*GLSPR	C	0.105623		Missed Filter (0.105623220140022; )	2.76986e+06	2.98026e+06	5.75012e+06
Q1KMD3_C57	Q1KMD3	LQEALDAEMLEDEAGGGGAGPGGACK	LQEALDAEMLEDEAGGGGAGPGGAC*K	C	0.105703		Missed Filter (0.105703385244739; )	1.34178e+07	14437341	2.78551e+07
Q86UP3_C22	Q86UP3	LCGTTQLDNEVPEK	LC*GTTQLDNEVPEK	C	-0.1059		Missed Filter (-0.105899897875636; )	1603465	1489980	3093445
P51692_C688	P51692	YYTPVPCESATAK	YYTPVPC*ESATAK	C	-0.106105		Missed Filter (-0.106105019206792; )	1.10993e+07	10312848	2.14122e+07
Q8IY17_C418	Q8IY17	CVSMPGDISGLQGGPR	C*VSMPGDISGLQGGPR	C	-0.106476		Missed Filter (-0.106476079980454; )	3.43253e+06	3188322	6.62085e+06
Q8IYL3_C124	Q8IYL3	VTPETPCENEFAEGSALLPGSEAGVSVQQGAASLPLGGCR	VTPETPCENEFAEGSALLPGSEAGVSVQQGAASLPLGGC*R	C	0.106677		Missed Filter (0.106676509105524; )	3870966	4.16804e+06	8.03901e+06
Q9NQE9_C32	Q9NQE9	SAGLAPDCEASATAETTVSSVGTCEAAGK	SAGLAPDCEASATAETTVSSVGTC*EAAGK	C	0.106955		Missed Filter (0.106955474007238; )	59071092	63611760	122682852
Q92667_C102	Q92667	LPAEPPALLQTHPPCR	LPAEPPALLQTHPPC*R	C	0.107774		Missed Filter (0.107773559619233; )	4011019	4.32213e+06	8.33315e+06
Q7Z3T8_C304	Q7Z3T8	TSALTCSLPK	TSALTC*SLPK	C	-0.108225		Missed Filter (-0.108225473080985; )	950648	881943	1.83259e+06
Q9Y520_C2340	Q9Y520	STTTSDPPNICK	STTTSDPPNIC*K	C	-0.108908		Missed Filter (-0.108907926933803; )	4.06698e+06	3771270	7.83825e+06
P0CAP2_C115	P0CAP2	AQNSDPILDTSSLVPGCSSVDNIK	AQNSDPILDTSSLVPGC*SSVDNIK	C	-0.109103		Missed Filter (-0.109102681569418; )	3.90386e+06	3.61952e+06	7.52338e+06
Q9NWD8_C305	Q9NWD8	QSNPEFCPEK	QSNPEFC*PEK	C	0.109724		Missed Filter (0.109724000950912; )	8525907	9.19902e+06	1.77249e+07
Q9H4A3_C2292	Q9H4A3	KFSAPGQLCISMTSNLGGSAPISAASATSLGHFTK	KFSAPGQLC*ISMTSNLGGSAPISAASATSLGHFTK	C	0.110904		Missed Filter (0.110903810282897; )	1.54361e+06	1666948	3.21055e+06
Q92547_C1099	Q92547	SGCNSASSTPDSTR	SGC*NSASSTPDSTR	C	-0.111054		Missed Filter (-0.111053625590417; )	1.18405e+06	1.09632e+06	2.28037e+06
Q99590_C553	Q99590	TDVCTVHLPNDFPTCLTSESK	TDVCTVHLPNDFPTC*LTSESK	C	-0.111312		Missed Filter (-0.111312018821481; )	2.43159e+06	2.25103e+06	4.68262e+06
Q5VT06_C1432	Q5VT06	EVTEVLQEATCK	EVTEVLQEATC*K	C	-0.111741		Missed Filter (-0.111741135553442; )	3.74853e+06	3.46915e+06	7.21768e+06
P30041_C91	P30041	DINAYNCEEPTEK	DINAYNC*EEPTEK	C	0.112023		Missed Filter (0.112023048766686; )	25271400	27301800	52573200
Q96KB5_C112	Q96KB5	AFTEANDGSLCLAMEYGGEK	AFTEANDGSLC*LAMEYGGEK	C	0.112357		Missed Filter (0.11235709692882; )	7620391	8237589	15857980
Q96JQ2_C445	Q96JQ2	NLSLCFEGSPR	NLSLC*FEGSPR	C	-0.11342		Missed Filter (-0.113420183304004; )	4589248	4.24328e+06	8.83253e+06
Q93052_C364	Q93052	TYITDPVSAPCAPPLQPK	TYITDPVSAPC*APPLQPK	C	-0.113841		Missed Filter (-0.113840977194611; )	2.82486e+06	2.61575e+06	5.44061e+06
Q96PV7_C766	Q96PV7	VGSCAEAGEGSR	VGSC*AEAGEGSR	C	-0.115152		Missed Filter (-0.115152463950298; )	1.69913e+06	1.56778e+06	3.26691e+06
Q9NX24_C18	Q9NX24	IKADPDGPEAQAEACSGER	IKADPDGPEAQAEAC*SGER	C	0.115333		Missed Filter (0.115333273989932; )	7.81284e+06	8463067	1.62759e+07
P27816_C535	P27816	NVCLPPEMEVALTEDQVPALK	NVC*LPPEMEVALTEDQVPALK	C	0.117019		Missed Filter (0.117019157757221; )	4.22835e+06	4585600	8.81395e+06
Q96SK2_C295	Q96SK2	FQYQLACR	FQYQLAC*R	C	-0.117804		Missed Filter (-0.117804478091127; )	1.03996e+06	958417	1.99838e+06
Q96N06_C101	Q96N06	ASNETLVSCSSSGSDQQR	ASNETLVSC*SSSGSDQQR	C	-0.118214		Missed Filter (-0.11821378356905; )	5401057	4976143	10377200
Q4VCS5_C647	Q4VCS5	QGNCQPTNVSEYNAAALMELLR	QGNC*QPTNVSEYNAAALMELLR	C	0.11871		Missed Filter (0.118710463914595; )	7986928	8671918	16658846
Q9NW68_C49	Q9NW68	DLTEFTQVVQHDTACTIAATASVVK	DLTEFTQVVQHDTAC*TIAATASVVK	C	0.120007		Missed Filter (0.120006664389174; )	16994569	18468504	35463073
Q7Z3T8_C377	Q7Z3T8	DVPSSLSCLPASGSMCGSLIESK	DVPSSLSC*LPASGSMCGSLIESK	C	0.120308		Missed Filter (0.120308129848977; )	4796958	5214135	10011093
Q96EK7_C380	Q96EK7	QEVPMCSDPEPR	QEVPMC*SDPEPR	C	-0.120329		Missed Filter (-0.120328697957094; )	2654831	2.44239e+06	5.09722e+06
Q9HAU0_C473	Q9HAU0	TRPESICSVTPSTHDK	TRPESIC*SVTPSTHDK	C	0.120688		Missed Filter (0.120688130279737; )	1664499	1.80973e+06	3.47423e+06
Q16555_C504	Q16555	GLYDGPVCEVSVTPK	GLYDGPVC*EVSVTPK	C	0.121269		Missed Filter (0.121269485917418; )	3379334	3675673	7055007
Q92917_C137	Q92917	GCTPSGEGADSEPR	GC*TPSGEGADSEPR	C	0.121295		Missed Filter (0.121294626319899; )	10147925	11038004	21185929
Q92667_C64	Q92667	ADPAIKEPLPVEDVCPK	ADPAIKEPLPVEDVC*PK	C	-0.121341		Missed Filter (-0.121340690145039; )	3.84489e+06	3.53473e+06	7379623
Q96EK7_C392	Q96EK7	QEVPTCTGPESR	QEVPTC*TGPESR	C	-0.121584		Missed Filter (-0.121583625288349; )	1.65311e+06	1519500	3.17261e+06
O43432_C301	O43432	STIAAPTSSALSSQPIFTTAIDDRCELSSPR	STIAAPTSSALSSQPIFTTAIDDRC*ELSSPR	C	0.121787		Missed Filter (0.12178738462245; )	928774	1.01058e+06	1.93936e+06
P46821_C2088	P46821	QDVDLCLVSSCEYKHPK	QDVDLCLVSSC*EYKHPK	C	0.122123		Missed Filter (0.122122643996497; )	1.00763e+07	10966050	2.10423e+07
Q16576_C97	Q16576	VHIPNDDAQFDASHCDSDKGEFGGFGSVTGK	VHIPNDDAQFDASHC*DSDKGEFGGFGSVTGK	C	-0.122348		Missed Filter (-0.122347963777641; )	3.29749e+06	3029373	6.32686e+06
Q96CP2_C132	Q96CP2	QDPGTDRTEDSGLAAGPPEAAGENFAPCSVAPGK	QDPGTDRTEDSGLAAGPPEAAGENFAPC*SVAPGK	C	0.12243		Missed Filter (0.122429607026112; )	4138334	4.50154e+06	8.63987e+06
Q9NP61_C312	Q9NP61	LGMGFGNCR	LGMGFGNC*R	C	0.122615		Missed Filter (0.122615225319787; )	7188121	7825755	15013876
Q12802_C1232	Q12802	STPSLPCMVSAQDAPLPK	STPSLPC*MVSAQDAPLPK	C	0.122939		Missed Filter (0.122939184787436; )	6.70199e+06	7298137	1.40001e+07
Q9BQ70_C83	Q9BQ70	SGCALTDAVAPGNK	SGC*ALTDAVAPGNK	C	0.123599		Missed Filter (0.123599356717259; )	4.1795e+06	4553353	8.73285e+06
Q96CD2_C173	Q96CD2	KLVCGDEGLGAMAEVGTIVDK	KLVC*GDEGLGAMAEVGTIVDK	C	0.124023		Missed Filter (0.124022522598569; )	1.58405e+06	1.72624e+06	3.31029e+06
Q5T1J5_C124	Q5T1J5	QFLECAQNQGDIK	QFLEC*AQNQGDIK	C	0.124132		Missed Filter (0.124131569109248; )	1.29132e+06	1.40735e+06	2.69867e+06
Q2M2Z5_C543	Q2M2Z5	EQEVSSGCGDK	EQEVSSGC*GDK	C	-0.124771		Missed Filter (-0.12477120024165; )	1.13139e+06	1.03765e+06	2169044
Q7Z4H7_C743	Q7Z4H7	ILDHLEVSCNKPSTNK	ILDHLEVSC*NKPSTNK	C	-0.124918		Missed Filter (-0.124917941062886; )	1.5496e+06	1.42107e+06	2.97066e+06
Q16566_C14	Q16566	VTVPSCSASSCSSVTASAAPGTASLVPDYWIDGSNR	VTVPSCSASSC*SSVTASAAPGTASLVPDYWIDGSNR	C	0.125702		Missed Filter (0.125702281277286; )	1.70787e+06	1863357	3.57123e+06
P54687_C4	P54687	MKDCSNGCSAECTGEGGSK	MKDC*SNGCSAECTGEGGSK	C	0.125877		Missed Filter (0.125876611774508; )	1.13209e+06	1235308	2.3674e+06
Q6PJG6_C487	Q6PJG6	TPGCSDLGPLIPQFLR	TPGC*SDLGPLIPQFLR	C	-0.126472		Missed Filter (-0.126471871455621; )	1.22689e+06	1.12391e+06	2.3508e+06
O60934_C487	O60934	IETSCSLLEQTQPATPSLWK	IETSC*SLLEQTQPATPSLWK	C	0.126802		Missed Filter (0.126801660995908; )	1.38694e+06	1.51436e+06	2.9013e+06
O14524_C434	O14524	CPAITQNNFLT	C*PAITQNNFLT	C	0.127097		Missed Filter (0.127096650736153; )	8389338	9161943	17551281
Q9H9A6_C23	Q9H9A6	DCGTSVPQGLLK	DC*GTSVPQGLLK	C	0.127671		Missed Filter (0.127671179953919; )	5.30311e+06	5.7938e+06	11096919
Q9UPS8_C462	Q9UPS8	NIGNEQAEDVFYIPSCMSGSR	NIGNEQAEDVFYIPSC*MSGSR	C	0.12829		Missed Filter (0.128290483123721; )	2307982	2.52262e+06	4.8306e+06
Q6ZSY5_C424	Q6ZSY5	IPPSSPLCGLGGSPR	IPPSSPLC*GLGGSPR	C	-0.128818		Missed Filter (-0.128818367782916; )	1.68557e+06	1.54159e+06	3.22716e+06
Q5SQN1_C246	Q5SQN1	EDVSMTSCEPFGK	EDVSMTSC*EPFGK	C	0.1295		Missed Filter (0.129500321380459; )	40782136	44612066	85394202
Q7Z6Z7_C3658	Q7Z6Z7	AQCETLSPDGLPEEQPQTTK	AQC*ETLSPDGLPEEQPQTTK	C	-0.129794		Missed Filter (-0.129794183497473; )	3.20442e+06	2.92872e+06	6133137
Q15043_C290	Q15043	LQNGDLDHMIPQHCSSELDGK	LQNGDLDHMIPQHC*SSELDGK	C	0.131826		Missed Filter (0.131826195926088; )	3446250	3.77599e+06	7.22224e+06
Q5VZ89_C1113	Q5VZ89	TCMSESTWNPEHR	TC*MSESTWNPEHR	C	-0.132282		Missed Filter (-0.132281711611993; )	5717893	5216933	10934826
Q14679_C319	Q14679	AEPLSCALDDSSDSQDPTK	AEPLSC*ALDDSSDSQDPTK	C	-0.132303		Missed Filter (-0.132303106227378; )	2.63699e+06	2405924	5.04292e+06
Q14789_C1257	Q14789	LPSTDQQESCSSTPGLEEPLFK	LPSTDQQESC*SSTPGLEEPLFK	C	-0.132412		Missed Filter (-0.13241206346402; )	10067286	9184434	19251720
Q7L266_C97	Q7L266	DLSAGAVSAVQCIANPIK	DLSAGAVSAVQC*IANPIK	C	0.132412		Missed Filter (0.132412338651554; )	1527947	1674821	3202768
Q5TGY1_C537	Q5TGY1	GLLLAPGCLPSEEPR	GLLLAPGC*LPSEEPR	C	0.132716		Missed Filter (0.132715752468249; )	1.24242e+06	1.36213e+06	2.60454e+06
Q96N67_C2125	Q96N67	AVLPVTCHR	AVLPVTC*HR	C	0.132907		Missed Filter (0.132907431925615; )	8442664	9257391	17700055
Q9NUQ3_C46	Q9NUQ3	FEIGTMEEAGICGLGVK	FEIGTMEEAGIC*GLGVK	C	0.132961		Missed Filter (0.132960546070155; )	1.23678e+07	13558741	2.59266e+07
O95239_C1224	O95239	ALASNTSFFSGCSPIEEEAH	ALASNTSFFSGC*SPIEEEAH	C	0.134583		Missed Filter (0.13458315008141; )	5838071	6.40889e+06	1.2247e+07
O75410_C467	O75410	LITSGCK	LITSGC*K	C	0.134667		Missed Filter (0.134667276557398; )	15610085	17137370	32747455
P46821_C2083	P46821	QDVDLCLVSSCEYK	QDVDLC*LVSSCEYK	C	0.134997		Missed Filter (0.134997123802378; )	1.52788e+07	1.67762e+07	3.2055e+07
O75821_C25	O75821	PTGDFDSKPSWADQVEEEGEDDKCVTSELLK	PTGDFDSKPSWADQVEEEGEDDKC*VTSELLK	C	0.135472		Missed Filter (0.135472499459646; )	50255360	5.52027e+07	1.05458e+08
Q96B01_C145	Q96B01	SPHISNCSVASDYLDLDKITVEDDVGGVQGK	SPHISNC*SVASDYLDLDKITVEDDVGGVQGK	C	0.13601		Missed Filter (0.136010442306274; )	2190380	2.40693e+06	4.59731e+06
Q9UPY3_C1197	Q9UPY3	DFCQGNQLNYYK	DFC*QGNQLNYYK	C	0.136481		Missed Filter (0.136480990399029; )	4334456	4.76452e+06	9.09898e+06
Q9H902_C106	Q9H902	EKEIDDCLVQAK	EKEIDDC*LVQAK	C	0.136781		Missed Filter (0.136780734161753; )	7586143	8.34058e+06	1.59267e+07
Q2TAZ0_C1870	Q2TAZ0	EGILDTAQTICDVASR	EGILDTAQTIC*DVASR	C	-0.137105		Missed Filter (-0.137104647938596; )	3.66616e+06	3.33379e+06	6.99995e+06
P04150_C367	P04150	CQGSGDDNLTSLGTLNFPGR	C*QGSGDDNLTSLGTLNFPGR	C	0.137871		Missed Filter (0.137870613098824; )	3.05666e+06	3.36318e+06	6419847
Q15021_C596	Q15021	ESTGNMVTGQTVCK	ESTGNMVTGQTVC*K	C	0.13788		Missed Filter (0.137879991553575; )	2364856	2.60202e+06	4.96688e+06
Q9UBU6_C93	Q9UBU6	RGEAASGSGAELQEQAGCEAPEAAAPR	RGEAASGSGAELQEQAGC*EAPEAAAPR	C	-0.138132		Missed Filter (-0.138131514635523; )	8.92642e+06	6898456	14489055
Q9BYT3_C467	Q9BYT3	DNFDMCSSSFTSSK	DNFDMC*SSSFTSSK	C	0.138311		Missed Filter (0.13831133458113; )	4229325	4654863	8884188
Q9NZR2_C4572	Q9NZR2	LYMDGQNCR	LYMDGQNC*R	C	-0.1385		Missed Filter (-0.138500051549452; )	2.54128e+06	2.30866e+06	4.84994e+06
Q13813_C2233	Q13813	TYLLDGSCMVEESGTLESQLEATK	TYLLDGSC*MVEESGTLESQLEATK	C	-0.139037		Missed Filter (-0.139036944582203; )	1139999	1.03526e+06	2.17526e+06
O14668_C166	O14668	LSNCDPPPTYEEATGQVNLQR	LSNC*DPPPTYEEATGQVNLQR	C	-0.139445		Missed Filter (-0.139444836592025; )	12258984	11129545	23388529
Q8WV99_C171	Q8WV99	AQAVASTSTVPSPSQTMPSCTSPSR	AQAVASTSTVPSPSQTMPSC*TSPSR	C	0.139679		Missed Filter (0.139679122086929; )	7648986	8.4243e+06	1.60733e+07
Q5T5Y3_C848	Q5T5Y3	TTPDASESCPAPLTTWR	TTPDASESC*PAPLTTWR	C	0.140153		Missed Filter (0.140152780861815; )	1.03916e+06	1.14518e+06	2.18433e+06
Q9NZZ3_C20	Q9NZZ3	APPPSLTDCIGTVDSR	APPPSLTDC*IGTVDSR	C	-0.140562		Missed Filter (-0.140561707812353; )	36864372	33442100	70306472
Q68DQ2_C1502	Q68DQ2	SSLSDSLVCISEK	SSLSDSLVC*ISEK	C	-0.140931		Missed Filter (-0.140931156344548; )	1.44155e+06	1.30739e+06	2.74894e+06
P15924_C1280	P15924	ACGSEIMQK	AC*GSEIMQK	C	-0.143527		Missed Filter (-0.143527302506252; )	1.09927e+07	9.9522e+06	20944935
Q3KQU3_C373	Q3KQU3	SASASPLTPCSVTR	SASASPLTPC*SVTR	C	0.143621		Missed Filter (0.143621122257872; )	4287517	4736310	9023827
O75179_C1690	O75179	LSETISEGTSNSLSTCTK	LSETISEGTSNSLSTC*TK	C	0.143693		Missed Filter (0.143692580495799; )	2585724	2.85652e+06	5.44225e+06
P37268_C374	P37268	TQNLPNCQLISR	TQNLPNC*QLISR	C	0.144976		Missed Filter (0.144976239583244; )	4.33012e+07	47878664	9.11799e+07
O94916_C108	O94916	AMQVESCSSAVGVSNR	AMQVESC*SSAVGVSNR	C	-0.145648		Missed Filter (-0.145648153411616; )	2.29361e+06	2.07336e+06	4366971
P20810_C381	P20810	SESELIDELSEDFDRSECK	SESELIDELSEDFDRSEC*K	C	-0.146663		Missed Filter (-0.146662788980152; )	4.22005e+06	3.81487e+06	8.03492e+06
Q96H79_C121	Q96H79	DCWSTCTLSHDIHTPVNMQVLK	DC*WSTCTLSHDIHTPVNMQVLK	C	0.14716		Missed Filter (0.147159731925542; )	3436628	3805678	7242306
Q8N806_C424	Q8N806	RVDGMQYYCS	RVDGMQYYC*S	C	0.148015		Missed Filter (0.148014897786627; )	1.02772e+06	1.13876e+06	2.16649e+06
P33981_C465	P33981	TPSSNTLDDYMSCFR	TPSSNTLDDYMSC*FR	C	0.148626		Missed Filter (0.148625996604576; )	4978758	5519019	10497777
P22059_C344	P22059	GATVLPANTPGNVGSGKDQCCSGK	GATVLPANTPGNVGSGKDQCC*SGK	C	-0.148934		Missed Filter (-0.148933547195168; )	2.35843e+06	2127105	4.48553e+06
Q00341_C940	Q00341	DCDPGSPR	DC*DPGSPR	C	-0.14966		Missed Filter (-0.149659675498151; )	1.5798e+07	1.42421e+07	30040106
O43683_C339	O43683	APCLPVTYQQTPVNMEK	APC*LPVTYQQTPVNMEK	C	-0.149847		Missed Filter (-0.149846648491653; )	1.91547e+06	1.7265e+06	3.64197e+06
Q6W2J9_C94	Q6W2J9	VPGNIVYSSLCGLGSEK	VPGNIVYSSLC*GLGSEK	C	-0.150098		Missed Filter (-0.150097676170255; )	743014	669596	1412610
Q17RS7_C246	Q17RS7	WNETSCNSSPQLLVTK	WNETSC*NSSPQLLVTK	C	-0.150214		Missed Filter (-0.150213520470019; )	1.85734e+06	1.67368e+06	3531027
Q96R06_C177	Q96R06	EEVAPCMGDR	EEVAPC*MGDR	C	-0.150491		Missed Filter (-0.150491182004153; )	2.1733e+07	1.95866e+07	4.13196e+07
Q02952_C1139	Q02952	APQVTESIESSELVTTCQAETLAGVK	APQVTESIESSELVTTC*QAETLAGVK	C	0.150598		Missed Filter (0.15059834470973; )	1.01668e+07	11284914	2.14517e+07
O95197_C582	O95197	SPASEAACSK	SPASEAAC*SK	C	0.151417		Missed Filter (0.151416719837145; )	3.41062e+06	3.78804e+06	7.19866e+06
Q7Z3D4_C27	Q7Z3D4	SFPLPGVQSSGQVHAFGNCSDSDILEEDAEVYELR	SFPLPGVQSSGQVHAFGNC*SDSDILEEDAEVYELR	C	0.151621		Missed Filter (0.151620639331618; )	4.9515e+06	5500207	1.04517e+07
Q9BZC7_C966	Q9BZC7	LSVMEEDQACAMESR	LSVMEEDQAC*AMESR	C	0.151774		Missed Filter (0.151774217977603; )	739135	821131	1.56027e+06
Q9HAW4_C915	Q9HAW4	LPLASMDENAMDANMDELLDLCTGK	LPLASMDENAMDANMDELLDLC*TGK	C	0.151841		Missed Filter (0.151841248692874; )	712932	792058	1.50499e+06
Q8TEU7_C1561	Q8TEU7	LPPASLSSNLVACVPSK	LPPASLSSNLVAC*VPSK	C	0.15294		Missed Filter (0.152939613305937; )	1.87409e+06	2083676	3.95777e+06
P05023_C374	P05023	NLEAVETLGSTSTICSDK	NLEAVETLGSTSTIC*SDK	C	-0.152993		Missed Filter (-0.1529925622325; )	1.30171e+07	9442880	19942167
Q9BVV6_C1480	Q9BVV6	TQIELNPYLTCVFSGGK	TQIELNPYLTC*VFSGGK	C	0.153232		Missed Filter (0.153232090988787; )	816178	907638	1.72382e+06
O75143_C339	O75143	THCAATPSSSEDTETVSNSSEGR	THC*AATPSSSEDTETVSNSSEGR	C	-0.154337		Missed Filter (-0.154337199087132; )	2.62993e+06	2.36311e+06	4993043
P12081_C507	P12081	TGQPLCIC	TGQPLC*IC	C	-0.154388		Missed Filter (-0.154388495533517; )	7739436	6953985	14693421
Q12802_C934	Q12802	AVTCSSIK	AVTC*SSIK	C	0.154419		Missed Filter (0.154419488719751; )	3875119	4.31291e+06	8.18802e+06
Q99941_C95	Q99941	SEPSSPCSSSSLSSESSR	SEPSSPC*SSSSLSSESSR	C	0.15482		Missed Filter (0.15482042629017; )	14940464	16632966	31573430
O43432_C1411	O43432	LDFIESDSPCSSEALSK	LDFIESDSPC*SSEALSK	C	0.155786		Missed Filter (0.155786235953505; )	4347656	4843413	9191069
Q2NKX8_C982	Q2NKX8	ENSLCGSAPNSR	ENSLC*GSAPNSR	C	-0.156615		Missed Filter (-0.156615277522573; )	8.10017e+06	7.26959e+06	1.53698e+07
Q96L21_C195	Q96L21	LIPDGCGVK	LIPDGC*GVK	C	0.157266		Missed Filter (0.157266280172576; )	12302026	13718876	26020902
O95754_C765	O95754	LTGAPLATCDETSI	LTGAPLATC*DETSI	C	-0.157689		Missed Filter (-0.157689080494331; )	1.25381e+06	1.12399e+06	2377807
Q8TDY2_C1413	Q8TDY2	SSSFVPSPYVATAPELYGACAPELPGESDR	SSSFVPSPYVATAPELYGAC*APELPGESDR	C	0.157998		Missed Filter (0.157997717894935; )	1.15369e+06	476777	904097
Q9UPN7_C795	Q9UPN7	VTEPSAPCQALVSIGDLQATFHGIR	VTEPSAPC*QALVSIGDLQATFHGIR	C	0.158686		Missed Filter (0.158685731061124; )	5.76904e+06	6.43193e+06	1.2201e+07
P49327_C1558	P49327	HAQPTCPGAQLCTVYYASLNFR	HAQPTC*PGAQLCTVYYASLNFR	C	-0.158909		Missed Filter (-0.158908588157409; )	1.12192e+06	1.0049e+06	2.12682e+06
Q9P246_C653	Q9P246	GDSPVTVDVSWGSPDCVGLTETK	GDSPVTVDVSWGSPDC*VGLTETK	C	0.159011		Missed Filter (0.159010541383497; )	3976411	4439747	8416158
Q8N3C0_C208	Q8N3C0	FLNEHLQEACTPELKPVEK	FLNEHLQEAC*TPELKPVEK	C	-0.159696		Missed Filter (-0.159696134717136; )	6013721	5383565	11397286
Q86VQ1_C297	Q86VQ1	VPCNVEGISPELEK	VPC*NVEGISPELEK	C	-0.160109		Missed Filter (-0.160109141873714; )	2.28752e+06	2.04723e+06	4.33475e+06
Q68DQ2_C380	Q68DQ2	NLVCSALLTGSNHR	NLVC*SALLTGSNHR	C	0.160276		Missed Filter (0.160275533189977; )	3.12324e+06	3.49022e+06	6613455
P00533_C1058	P00533	NGLQSCPIKEDSFLQR	NGLQSC*PIKEDSFLQR	C	0.16077		Missed Filter (0.160769927205743; )	729220	815184	1.5444e+06
P04183_C206	P04183	ASGQPAGPDNKENCPVPGKPGEAVAAR	ASGQPAGPDNKENC*PVPGKPGEAVAAR	C	-0.16084		Missed Filter (-0.160840047867561; )	1.43255e+06	1.28142e+06	2.71397e+06
P55196_C1684	P55196	LLEPEAPGLCRPPLPR	LLEPEAPGLC*RPPLPR	C	0.161141		Missed Filter (0.161141419052823; )	2.20109e+06	2.4612e+06	4.66229e+06
Q7Z6Z7_C3375	Q7Z6Z7	ACSPCSSQSSSSGICTDFWDLLVK	ACSPC*SSQSSSSGICTDFWDLLVK	C	0.16148		Missed Filter (0.161480369967325; )	1.17477e+06	1.31391e+06	2.48868e+06
P26641_C266	P26641	AAAPAPEEEMDECEQALAAEPK	AAAPAPEEEMDEC*EQALAAEPK	C	0.161556		Missed Filter (0.161555884305249; )	4.62072e+07	51677666	9.78848e+07
O75170_C761	O75170	FTDFQPFCCSESGPR	FTDFQPFC*CSESGPR	C	0.16278		Missed Filter (0.162779763958585; )	2808206	3.14362e+06	5.95183e+06
P04150_C287	P04150	TEKEDFIELCTPGVIK	TEKEDFIELC*TPGVIK	C	-0.163681		Missed Filter (-0.163681361899852; )	1.84336e+06	1.64565e+06	3.48901e+06
Q76I76_C1054	Q76I76	SVTVLCTLDENLNR	SVTVLC*TLDENLNR	C	-0.163698		Missed Filter (-0.16369754416676; )	895200	799176	1.69438e+06
P20810_C328	P20810	CGEDDETIPSEYR	C*GEDDETIPSEYR	C	0.165032		Missed Filter (0.165032345288196; )	1.42513e+07	1.59783e+07	3.02296e+07
Q9UKA8_C173	Q9UKA8	QSEDAMPVINYDLLCAVSK	QSEDAMPVINYDLLC*AVSK	C	-0.165304		Missed Filter (-0.165304152110657; )	1.55142e+06	1383461	2.93488e+06
Q2NKX8_C998	Q2NKX8	TCLSWEFSEKDDEPEEVVVK	TC*LSWEFSEKDDEPEEVVVK	C	-0.16534		Missed Filter (-0.165339735545934; )	5468580	4876434	10345014
Q8IY95_C266	Q8IY95	LLALTSSDLGCQPSR	LLALTSSDLGC*QPSR	C	0.165695		Missed Filter (0.165694605480506; )	2.47019e+06	2.77083e+06	5.24102e+06
P10599_C32	P10599	LVVVDFSATWCGPCK	LVVVDFSATWC*GPCK	C	-0.166705		Missed Filter (-0.166705491074885; )	1.28655e+06	1146156	2.43271e+06
Q9HBK9_C360	Q9HBK9	CVPDAAGGCCGTK	C*VPDAAGGCCGTK	C	-0.16692		Missed Filter (-0.166920274290094; )	4075870	3630549	7706419
Q9H8M7_C131	Q9H8M7	TTEETASISGSPAESSCQVEHSSALAVEELGFER	TTEETASISGSPAESSC*QVEHSSALAVEELGFER	C	0.167087		Missed Filter (0.16708739201133; )	6.51563e+06	7.31359e+06	1.38292e+07
Q9Y2L5_C265	Q9Y2L5	NSIQNQESYEDGPCTITSNK	NSIQNQESYEDGPC*TITSNK	C	0.170896		Missed Filter (0.170895879825682; )	3.97568e+06	4.47565e+06	8451332
Q9NQS7_C801	Q9NQS7	ALNVTVDVQSPACTSYQMTPQGHR	ALNVTVDVQSPAC*TSYQMTPQGHR	C	0.171484		Missed Filter (0.171483995198495; )	12055395	13572088	25627483
Q99439_C215	Q99439	CASQVGMTAPGTR	C*ASQVGMTAPGTR	C	0.171743		Missed Filter (0.17174299232881; )	1.45445e+07	1.63827e+07	3.09272e+07
Q86XL3_C91	Q86XL3	CGPITSTTR	C*GPITSTTR	C	-0.173515		Missed Filter (-0.173515184562626; )	1.24493e+07	11038505	2.34878e+07
O95292_C121	O95292	CVFELPAENDKPHDVEINK	C*VFELPAENDKPHDVEINK	C	-0.175272		Missed Filter (-0.175272143511926; )	3.84422e+06	3.40444e+06	7248662
Q6PJW8_C408	Q6PJW8	LQLAQTEACQDVAR	LQLAQTEAC*QDVAR	C	0.176234		Missed Filter (0.176233576332114; )	4554115	5145832	9699947
A8MVW0_C742	A8MVW0	TGLCSPEDNSLTPLLDEVAAPEGR	TGLC*SPEDNSLTPLLDEVAAPEGR	C	0.176613		Missed Filter (0.17661297711063; )	943054	1.06586e+06	2.00892e+06
Q6UWE0_C418	Q6UWE0	QNLVQQACSSMAEMDER	QNLVQQAC*SSMAEMDER	C	-0.176672		Missed Filter (-0.176672122877601; )	5509406	4874400	10383806
Q9Y6I3_C205	Q9Y6I3	EEADQPPSCGPEDDAQLQLALSLSR	EEADQPPSC*GPEDDAQLQLALSLSR	C	-0.176789		Missed Filter (-0.176789440480175; )	3.29473e+06	2914747	6.20948e+06
Q96FW1_C23	Q96FW1	QEPLGSDSEGVNCLAYDEAIMAQQDR	QEPLGSDSEGVNC*LAYDEAIMAQQDR	C	0.176862		Missed Filter (0.176861573054817; )	15891343	17963497	33854840
Q00653_C432	Q00653	TPQCEPQAPEMLQR	TPQC*EPQAPEMLQR	C	0.177525		Missed Filter (0.177524774463774; )	3807048	4305550	8112598
P52888_C7	P52888	MKPPAACAGDMADAASPCSVVNDLR	MKPPAAC*AGDMADAASPCSVVNDLR	C	0.17762		Missed Filter (0.177620015400594; )	12161103	1.3749e+07	2.59101e+07
Q8N3C0_C324	Q8N3C0	ILGENAKPNYGCQVTIQSEQEK	ILGENAKPNYGC*QVTIQSEQEK	C	0.178377		Missed Filter (0.178377372726865; )	1.0622e+07	12015846	2.26378e+07
P18031_C32	P18031	HEASDFPCR	HEASDFPC*R	C	-0.179393		Missed Filter (-0.179392784400788; )	1.77082e+07	1.56376e+07	3.33458e+07
O60343_C1286	O60343	DLNCNPNNK	DLNC*NPNNK	C	-0.179517		Missed Filter (-0.17951735731906; )	4.00567e+06	3537001	7.54267e+06
O94898_C902	O94898	VICSDCYDNANIYSR	VIC*SDCYDNANIYSR	C	0.180782		Missed Filter (0.180782393135059; )	1.75921e+06	1.99406e+06	3.75326e+06
P28290_C448	P28290	SVHISTPEKEPCAPLTIPSIR	SVHISTPEKEPC*APLTIPSIR	C	0.182594		Missed Filter (0.182593789764054; )	3.1798e+06	3608826	6.78863e+06
Q14571_C1893	Q14571	EMDPEIDIMCTGPEAGNTEEK	EMDPEIDIMC*TGPEAGNTEEK	C	0.182607		Missed Filter (0.182606670344013; )	4479466	5083892	9563358
P49792_C2791	P49792	SQTEEITSTTDSVYTGGTEVMVPSFCK	SQTEEITSTTDSVYTGGTEVMVPSFC*K	C	0.183016		Missed Filter (0.1830159393801; )	3.5716e+07	40546733	7.62627e+07
Q9H9A5_C504	Q9H9A5	NSNQLGGNTESSESSETCSSK	NSNQLGGNTESSESSETC*SSK	C	0.183329		Missed Filter (0.183329465401255; )	2836861	3.22126e+06	6.05812e+06
Q96CW6_C166	Q96CW6	TSDPDVILCNSVELIR	TSDPDVILC*NSVELIR	C	0.184562		Missed Filter (0.184562274513612; )	9613140	10925066	20538206
Q02952_C470	Q02952	LKETCVSGEDPTQGADLSPDEK	LKETC*VSGEDPTQGADLSPDEK	C	-0.184906		Missed Filter (-0.184906308515345; )	8959238	7.8815e+06	1.68407e+07
Q05655_C127	Q05655	VLMSVQYFLEDVDCK	VLMSVQYFLEDVDC*K	C	0.185497		Missed Filter (0.185497495160903; )	5.14619e+06	5852290	1.09985e+07
P47712_C726	P47712	CSVSLSNVEAR	C*SVSLSNVEAR	C	-0.185753		Missed Filter (-0.185753130764231; )	3.43076e+06	3.01629e+06	6.44705e+06
O75143_C331	O75143	LATCTPSDR	LATC*TPSDR	C	-0.185766		Missed Filter (-0.185765787419418; )	6163438	5.41879e+06	1.15822e+07
Q12756_C609	Q12756	ERTPCAETPAEPVDWAFAQR	ERTPC*AETPAEPVDWAFAQR	C	0.185858		Missed Filter (0.185858290120474; )	3.38516e+06	2604679	4.89452e+06
P42702_C1061	P42702	SIDSNSEIVSFGSPCSINSR	SIDSNSEIVSFGSPC*SINSR	C	0.187114		Missed Filter (0.187114470960997; )	1.96657e+06	2.23891e+06	4.20548e+06
Q9H553_C59	Q9H553	IWTAHYDPGHCFAESR	IWTAHYDPGHC*FAESR	C	-0.187739		Missed Filter (-0.187738559735637; )	4.10819e+06	2.48088e+06	5.30654e+06
Q9P000_C160	Q9P000	IQEDPSLCGDKPSISAVTVELSK	IQEDPSLC*GDKPSISAVTVELSK	C	0.187993		Missed Filter (0.187993388756857; )	1.1671e+06	3.21799e+06	2.49664e+06
P55265_C392	P55265	NAEFLTCNIPTSNASNNMVTTEK	NAEFLTC*NIPTSNASNNMVTTEK	C	0.188446		Missed Filter (0.188446230113915; )	3.33993e+06	3805969	7.1459e+06
Q5SW79_C235	Q5SW79	QVEEQSAAANEEVLFPFCR	QVEEQSAAANEEVLFPFC*R	C	-0.189028		Missed Filter (-0.189027956353903; )	11380818	9983214	21364032
P07814_C92	P07814	LSSCDSFTSTINELNHCLSLR	LSSC*DSFTSTINELNHCLSLR	C	-0.189192		Missed Filter (-0.189191577221715; )	1.09925e+06	964153	2.06341e+06
Q2NKX8_C825	Q2NKX8	GFGSVEELCTNSSLGMEK	GFGSVEELC*TNSSLGMEK	C	0.189302		Missed Filter (0.189302164781989; )	10239865	11675617	21915482
Q04721_C1829	Q04721	GPDGCTPLMLASLR	GPDGC*TPLMLASLR	C	0.190178		Missed Filter (0.190177640815082; )	2.76094e+06	3149971	5.91091e+06
Q5SNT2_C498	Q5SNT2	SGEFPVSDYFSLLSGSCPSSPLPSPAPSVAGSVASSSGSLR	SGEFPVSDYFSLLSGSC*PSSPLPSPAPSVAGSVASSSGSLR	C	0.190283		Missed Filter (0.190283005914413; )	4.91068e+06	5603025	1.05137e+07
Q92551_C372	Q92551	LKHLDMVLPEVASSCGPSTSPSNTSPEAGPSSQPK	LKHLDMVLPEVASSC*GPSTSPSNTSPEAGPSSQPK	C	0.190638		Missed Filter (0.190637633320622; )	3.62425e+06	5.03947e+06	7.76049e+06
P78559_C1174	P78559	SPCGLTEQYLHK	SPC*GLTEQYLHK	C	0.19087		Missed Filter (0.190870437319297; )	11124660	12698268	23822928
Q6PJI9_C791	Q6PJI9	YPSFTSSGSCSSMSDPGLNTGGWNIAGR	YPSFTSSGSC*SSMSDPGLNTGGWNIAGR	C	0.191155		Missed Filter (0.191154874319013; )	1451173	1.65677e+06	3.10794e+06
Q14789_C681	Q14789	SLSAVPDIGQCHQDELER	SLSAVPDIGQC*HQDELER	C	-0.191439		Missed Filter (-0.191439442947335; )	1.01336e+06	887429	1.90079e+06
Q7Z6I8_C158	Q7Z6I8	LADLGYGCGTAAFPYPMMHGR	LADLGYGC*GTAAFPYPMMHGR	C	0.191489		Missed Filter (0.191489407725565; )	792283	904741	1.69702e+06
Q7Z2W4_C721	Q7Z2W4	TSSVSLTATFRPQEDFCFLSSK	TSSVSLTATFRPQEDFC*FLSSK	C	0.19283		Missed Filter (0.192830041560271; )	13608798	15554820	29163618
Q96B23_C57	Q96B23	DGVADSTVISSMPCLLMELR	DGVADSTVISSMPC*LLMELR	C	0.193484		Missed Filter (0.193483550633913; )	941134	1.07621e+06	2.01734e+06
Q9HBM1_C27	Q9HBM1	STDTSCQMAGLR	STDTSC*QMAGLR	C	-0.193508		Missed Filter (-0.193508091852721; )	13942599	1.21925e+07	2.61351e+07
P46821_C2065	P46821	TPQASTYSYETSDLCYTAEK	TPQASTYSYETSDLC*YTAEK	C	0.194546		Missed Filter (0.194545701170993; )	1.26592e+07	1.44833e+07	2.71424e+07
P40855_C128	P40855	VGSDMTSQQEFTSCLK	VGSDMTSQQEFTSC*LK	C	0.19517		Missed Filter (0.195170173414509; )	2.74682e+06	3144722	5.89154e+06
Q7Z5K2_C94	Q7Z5K2	CSSYSESSEAAQLEEVTSVLEANSK	C*SSYSESSEAAQLEEVTSVLEANSK	C	-0.19527		Missed Filter (-0.195270347933492; )	2.21051e+06	1930684	4.1412e+06
Q8N3C0_C366	Q8N3C0	AGEDLEVSEGLMCFDPK	AGEDLEVSEGLMC*FDPK	C	0.195749		Missed Filter (0.195749462047296; )	2.01829e+06	2311586	4.32988e+06
Q12888_C513	Q12888	NSPEDLGLSLTGDSCK	NSPEDLGLSLTGDSC*K	C	0.197131		Missed Filter (0.197130735554179; )	2.09624e+06	2403168	4.49941e+06
Q12948_C550	Q12948	TSGAFVYDCSK	TSGAFVYDC*SK	C	-0.199444		Missed Filter (-0.199444015986293; )	4.39881e+06	3.83727e+06	8.23608e+06
Q86XL3_C176	Q86XL3	TCSVPPSDTDTYR	TC*SVPPSDTDTYR	C	-0.199827		Missed Filter (-0.199826737757879; )	5002810	4355722	9358532
O75044_C893	O75044	CSISGHGSLNSISR	C*SISGHGSLNSISR	C	0.200736		Missed Filter (0.200735952008421; )	1522121	1749350	3271471
P33981_C322	P33981	DLVVPGSKPSGNDSCELR	DLVVPGSKPSGNDSC*ELR	C	0.200935		Missed Filter (0.200935263032735; )	1.62831e+06	1.87165e+06	3.49995e+06
A8CG34_C245	A8CG34	MVCSPVTVR	MVC*SPVTVR	C	0.201061		Missed Filter (0.201061254339396; )	5.72209e+06	6.57771e+06	1.22998e+07
Q14684_C583	Q14684	AGPGSLELCGLPSQK	AGPGSLELC*GLPSQK	C	0.20313		Missed Filter (0.20312975317915; )	1.17506e+06	1.35273e+06	2.52779e+06
P42166_C280	P42166	NLFISCK	NLFISC*K	C	0.203608		Missed Filter (0.203608186496087; )	5610780	6461233	12072013
Q04864_C524	Q04864	LLSMNLENPSCNSVLDPR	LLSMNLENPSC*NSVLDPR	C	0.203909		Missed Filter (0.203909385152127; )	3.01128e+06	3.46844e+06	6479726
Q5VZL5_C1264	Q5VZL5	SDPLGSTQDHALSQESSEPGCR	SDPLGSTQDHALSQESSEPGC*R	C	-0.204053		Missed Filter (-0.204052609319014; )	4.32717e+06	3.75645e+06	8083615
Q15398_C718	Q15398	VDCLSSER	VDC*LSSER	C	0.204078		Missed Filter (0.20407841327056; )	1.29992e+07	1.49736e+07	27972761
P31260_C200	P31260	GPPPDGCALGTSSGVPVPGYFR	GPPPDGC*ALGTSSGVPVPGYFR	C	-0.204316		Missed Filter (-0.204316221303558; )	1.05777e+06	918094	1.97587e+06
Q12800_C453	Q12800	IAQLFSISPCQISQIYK	IAQLFSISPC*QISQIYK	C	0.205503		Missed Filter (0.205503162095261; )	2.03236e+07	2.34349e+07	4.37586e+07
Q4G0F5_C334	Q4G0F5	TPSQLSDNNCR	TPSQLSDNNC*R	C	-0.206502		Missed Filter (-0.206502162282493; )	2206423	1.91217e+06	4.11859e+06
Q9NP61_C241	Q9NP61	LANTCFNEIEK	LANTC*FNEIEK	C	-0.207166		Missed Filter (-0.207166393488178; )	6590157	5.70881e+06	1.2299e+07
P52569_C445	P52569	CSPEKDGLGSSPR	C*SPEKDGLGSSPR	C	-0.208085		Missed Filter (-0.208085360366187; )	3252787	2815890	6068677
A8CG34_C284	A8CG34	SAIPEQIISSTLSSPSSNAPDPCAK	SAIPEQIISSTLSSPSSNAPDPC*AK	C	0.208708		Missed Filter (0.208707828107686; )	4.32429e+06	3.79095e+06	7.07131e+06
Q96S59_C513	Q96S59	GSTAHFSGFESCSNGVISNK	GSTAHFSGFESC*SNGVISNK	C	0.211021		Missed Filter (0.211021292564842; )	2.5615e+06	2.96496e+06	5.52647e+06
O60664_C39	O60664	VASMPLISSTCDMVSAAYASTK	VASMPLISSTC*DMVSAAYASTK	C	0.211245		Missed Filter (0.211244888418033; )	1.17779e+06	1.36352e+06	2541311
Q8TBC4_C28	Q8TBC4	MAVDGGCGDTGDWEGR	MAVDGGC*GDTGDWEGR	C	0.212265		Missed Filter (0.212265263744685; )	2187636	2534389	4722025
P67936_C247	P67936	EENVGLHQTLDQTLNELNCI	EENVGLHQTLDQTLNELNC*I	C	0.212718		Missed Filter (0.21271782329359; )	3.0663e+06	3553437	6.61973e+06
P12955_C482	P12955	TVEEIEACMAGCDK	TVEEIEACMAGC*DK	C	-0.213634		Missed Filter (-0.213634143184747; )	2.51372e+06	2.16774e+06	4.68146e+06
Q8IX90_C147	Q8IX90	TDVKDDLSDPPVASSCISEK	TDVKDDLSDPPVASSC*ISEK	C	0.213854		Missed Filter (0.213853912619511; )	1.30676e+07	1.51543e+07	2.82219e+07
Q567U6_C282	Q567U6	LTASSVGQIVGLCSAEIK	LTASSVGQIVGLC*SAEIK	C	0.214894		Missed Filter (0.214894329197391; )	986438	1.14488e+06	2.13132e+06
Q9ULV4_C420	Q9ULV4	CDLISIPK	C*DLISIPK	C	0.215092		Missed Filter (0.215091693915134; )	1.27933e+06	1.48501e+06	2764338
Q9NZT2_C417	Q9NZT2	IALNLEGCALSQGSLR	IALNLEGC*ALSQGSLR	C	0.215465		Missed Filter (0.215465160903114; )	9199340	10681153	19880493
Q8N4J0_C18	Q8N4J0	LPEGCGGGGGGSEEVEVQFSAGR	LPEGC*GGGGGGSEEVEVQFSAGR	C	0.215987		Missed Filter (0.215987496952631; )	6528355	7582676	14111031
Q9NUM4_C64	Q9NUM4	DSVTCPTCQGTGR	DSVTCPTC*QGTGR	C	0.21605		Missed Filter (0.216049684847195; )	2261732	18526498	4888844
Q13905_C474	Q13905	SAASQTADGSGCR	SAASQTADGSGC*R	C	-0.216557		Missed Filter (-0.216557381584142; )	5.05299e+06	4.34881e+06	9.4018e+06
Q02241_C933	Q02241	CSVAVEMR	C*SVAVEMR	C	-0.216568		Missed Filter (-0.216567577786614; )	10149204	8734512	18883716
Q96T51_C81	Q96T51	ATGNLSASCGSALR	ATGNLSASC*GSALR	C	-0.216783		Missed Filter (-0.216782743207617; )	10627351	9.16298e+06	1.97903e+07
Q9C0C2_C136	Q9C0C2	CAAPGGVR	C*AAPGGVR	C	-0.217184		Missed Filter (-0.217183609866764; )	1.71013e+06	1.47113e+06	3.18125e+06
Q9P253_C22	Q9P253	SAVLQPGCPSVGIPHSGYVNAQLEK	SAVLQPGC*PSVGIPHSGYVNAQLEK	C	-0.217276		Missed Filter (-0.217275577517739; )	1.37237e+06	1.1805e+06	2.55287e+06
Q8N0X7_C405	Q8N0X7	AKDTSSEEVNLSHIVPCEPVPEEKPK	AKDTSSEEVNLSHIVPC*EPVPEEKPK	C	0.217298		Missed Filter (0.217297992233882; )	9871422	11475116	21346538
Q05209_C470	Q05209	SASPCIADK	SASPC*IADK	C	0.219595		Missed Filter (0.219594992863668; )	2657992	3.09498e+06	5.75298e+06
Q8N3S3_C300	Q8N3S3	SGEDGIQNHEPQCETIRPEETAWNTGTLR	SGEDGIQNHEPQC*ETIRPEETAWNTGTLR	C	0.220013		Missed Filter (0.220013070464181; )	1.18941e+06	1.38536e+06	2.57477e+06
P20810_C241	P20810	EGITGPPADSSKPIGPDDAIDALSSDFTCGSPTAAGK	EGITGPPADSSKPIGPDDAIDALSSDFTC*GSPTAAGK	C	0.220503		Missed Filter (0.220503208508432; )	8366577	9748233	18114810
Q7L266_C115	Q7L266	TPHCFLTDQGAAQFAAAMGVPEIPGEK	TPHC*FLTDQGAAQFAAAMGVPEIPGEK	C	-0.221736		Missed Filter (-0.221736342070059; )	1.15901e+06	993888	2.1529e+06
Q9HBM0_C665	Q9HBM0	TEYLCENSLEGK	TEYLC*ENSLEGK	C	-0.221872		Missed Filter (-0.221872272308344; )	9.34606e+06	8.018e+06	1.73641e+07
P52888_C682	P52888	GLQVGGCEPEPQVC	GLQVGGC*EPEPQVC	C	-0.222078		Missed Filter (-0.222078128615216; )	2.90048e+06	2.48667e+06	5387152
Q8TEQ6_C806	Q8TEQ6	EPVICTPVSSGFEK	EPVIC*TPVSSGFEK	C	-0.223155		Missed Filter (-0.22315476383509; )	14737520	12625487	27363007
Q9BW91_C347	Q9BW91	DAHWSEDSEADCHAL	DAHWSEDSEADC*HAL	C	-0.22352		Missed Filter (-0.223519677611721; )	2.74406e+06	2.35022e+06	5.09428e+06
Q6P158_C65	Q6P158	IWDDGDDFCIFSESR	IWDDGDDFC*IFSESR	C	-0.224687		Missed Filter (-0.22468701751693; )	856710	733156	1.58987e+06
Q86US8_C182	Q86US8	VEEEEVLNQVEQLRVEEDECR	VEEEEVLNQVEQLRVEEDEC*R	C	-0.226407		Missed Filter (-0.226406530930901; )	3.81175e+06	3.2626e+06	7074357
Q9Y487_C165	Q9Y487	NVEFEPTYEEFPSLESDSLLDYSCMQR	NVEFEPTYEEFPSLESDSLLDYSC*MQR	C	0.226764		Missed Filter (0.226763782398351; )	3357608	5.51222e+06	7.2867e+06
Q9ULW0_C100	Q9ULW0	EAEKENLVEQSIPSNACSSLEVEAAISR	EAEKENLVEQSIPSNAC*SSLEVEAAISR	C	0.227585		Missed Filter (0.227584629327941; )	11958583	14001527	25960110
P14923_C33	P14923	VTEWQQTYTYDSGIHSGANTCVPSVSSK	VTEWQQTYTYDSGIHSGANTC*VPSVSSK	C	0.228461		Missed Filter (0.22846083658679; )	6.63681e+06	7.77379e+06	1.44106e+07
Q96SB4_C356	Q96SB4	DTEGGAAEINCNGVIEVINYTQNSNNETLR	DTEGGAAEINC*NGVIEVINYTQNSNNETLR	C	0.228506		Missed Filter (0.228506105510488; )	9128480	1.06936e+07	1.98221e+07
O00178_C662	O00178	SQGACVTPASGC	SQGAC*VTPASGC	C	0.22882		Missed Filter (0.228820011322034; )	6617459	7.75484e+06	1.43723e+07
O75170_C769	O75170	CSSPVDTECSHAEGSR	C*SSPVDTECSHAEGSR	C	0.229823		Missed Filter (0.229823049700721; )	3857847	4524063	8381910
Q5UIP0_C2169	Q5UIP0	CVWSPLASPSTSILK	C*VWSPLASPSTSILK	C	0.230899		Missed Filter (0.230898813153668; )	1.20226e+06	1.41093e+06	2.61319e+06
Q15650_C86	Q15650	NDQELISDPLQQCFK	NDQELISDPLQQC*FK	C	0.230922		Missed Filter (0.230921820861797; )	2021451	2.37234e+06	4.39379e+06
O14810_C105	O14810	KAIPPGCGDEVEEEDESILDTVIK	KAIPPGC*GDEVEEEDESILDTVIK	C	0.231771		Missed Filter (0.231770692120959; )	2.82535e+06	3.31773e+06	6.14308e+06
Q15052_C553	Q15052	GPASCSSLSK	GPASC*SSLSK	C	0.23366		Missed Filter (0.233659893880951; )	6.11159e+06	7183023	1.32946e+07
Q9UPQ9_C254	Q9UPQ9	GSQCQSASSGNECNLGVWK	GSQCQSASSGNEC*NLGVWK	C	-0.234424		Missed Filter (-0.234424140252662; )	1.17417e+06	998073	2.17224e+06
P35790_C22	P35790	FCTGGEAEPSPLGLLLSCGSGSAAPAPGVGQQR	FCTGGEAEPSPLGLLLSC*GSGSAAPAPGVGQQR	C	-0.235174		Missed Filter (-0.235174461813117; )	1.12352e+06	954520	2078038
Q86W56_C397	Q86W56	LPGNISSLNVECR	LPGNISSLNVEC*R	C	-0.236936		Missed Filter (-0.236935682814334; )	2.74311e+06	2.32765e+06	5.07076e+06
Q6FI81_C274	Q6FI81	SACGNCYLGDAFR	SAC*GNCYLGDAFR	C	0.237515		Missed Filter (0.237515312631153; )	2.6335e+06	3.35801e+06	5.73828e+06
O00233_C59	O00233	GIGMNEPLVDCEGYPR	GIGMNEPLVDC*EGYPR	C	0.237843		Missed Filter (0.237843497478694; )	2268128	2.67464e+06	4.94277e+06
Q14008_C1500	Q14008	CEMPELVQHK	C*EMPELVQHK	C	0.237936		Missed Filter (0.2379358133614; )	9041964	10663225	19705189
Q96EY5_C231	Q96EY5	SCSPLAFSAFGDLTIK	SC*SPLAFSAFGDLTIK	C	0.238479		Missed Filter (0.238478942805294; )	1.32862e+06	1.56743e+06	2.89605e+06
A0MZ66_C565	A0MZ66	VTFQPPSSIGCR	VTFQPPSSIGC*R	C	-0.238985		Missed Filter (-0.238984603311942; )	5.49015e+06	4652029	1.01422e+07
Q8N5K1_C110	Q8N5K1	TFPACDGSHNK	TFPAC*DGSHNK	C	-0.239849		Missed Filter (-0.239848670269913; )	212926761	180325026	393251787
Q96G46_C282	Q96G46	TCGPLTDEDVVR	TC*GPLTDEDVVR	C	0.241016		Missed Filter (0.241016473711644; )	1.20857e+06	1.42832e+06	2.63689e+06
Q9Y6A5_C242	Q9Y6A5	HGGVCAPAAVATSPPGAIPK	HGGVC*APAAVATSPPGAIPK	C	-0.243895		Missed Filter (-0.243895425138295; )	4.02976e+06	3.40298e+06	7.43274e+06
Q14574_C792	Q14574	GGNQTLESCR	GGNQTLESC*R	C	0.244659		Missed Filter (0.244659112582026; )	990162	1.17316e+06	2.16332e+06
Q13228_C5	Q13228	CGNCGPGYSTPLEAMK	C*GNCGPGYSTPLEAMK	C	-0.244943		Missed Filter (-0.244943429688409; )	2.09257e+06	1765810	3.85838e+06
P83436_C505	P83436	YLSDSCSPR	YLSDSC*SPR	C	0.24545		Missed Filter (0.245449560577856; )	2.82412e+06	3.34788e+06	6.172e+06
Q9C0B1_C171	Q9C0B1	ANEDAVPLCMSADFPR	ANEDAVPLC*MSADFPR	C	0.245496		Missed Filter (0.245496417283551; )	1.58817e+07	1.8827e+07	3.47087e+07
O14717_C222	O14717	NVEPNISFDGSIQCSGK	NVEPNISFDGSIQC*SGK	C	-0.246487		Missed Filter (-0.246487179290984; )	5013298	4.22594e+06	9.23924e+06
O14654_C1055	O14654	IYVVDPFSECCMDISLSPSR	IYVVDPFSECC*MDISLSPSR	C	0.246604		Missed Filter (0.246604487125967; )	1.62115e+06	1.92335e+06	3.5445e+06
O60291_C528	O60291	AASIENVLQDSSPEHCGR	AASIENVLQDSSPEHC*GR	C	0.247875		Missed Filter (0.2478750666015; )	14327660	17013415	31341075
Q9BZ95_C173	Q9BZ95	ELFESSLCGDLLNEVQASEHTK	ELFESSLC*GDLLNEVQASEHTK	C	0.248062		Missed Filter (0.248062486355391; )	986010	1170996	2.15701e+06
Q13111_C79	Q13111	SPDLEASLDTLENNCHVGSDIDFRPK	SPDLEASLDTLENNC*HVGSDIDFRPK	C	0.248403		Missed Filter (0.248403482897358; )	2360414	3.17164e+06	5.16433e+06
Q9H8W4_C219	Q9H8W4	ICDFCYDLLSAGDMATCQPAR	ICDFCYDLLSAGDMATC*QPAR	C	0.248486		Missed Filter (0.248486294521753; )	2.71209e+06	3.62076e+06	5.93395e+06
Q9H6R6_C398	Q9H6R6	CPCDAETDQAPEGEKK	CPC*DAETDQAPEGEKK	C	0.248644		Missed Filter (0.248643652464701; )	3.90927e+06	4644565	8.55384e+06
Q9UPQ9_C245	Q9UPQ9	GSQCQSASSGNECNLGVWK	GSQC*QSASSGNECNLGVWK	C	-0.249649		Missed Filter (-0.249649366706699; )	1.46639e+06	1.23338e+06	2.69977e+06
O75592_C2700	O75592	GASCSAQGFDYGLGNSK	GASC*SAQGFDYGLGNSK	C	0.251025		Missed Filter (0.25102508720689; )	7748388	9220988	16969376
Q9Y4P1_C189	Q9Y4P1	TSVPCAGATAFPADSDR	TSVPC*AGATAFPADSDR	C	0.251031		Missed Filter (0.251031301419073; )	10254812	12203816	22458628
Q13615_C826	Q13615	VGYGTSQSCSLLPSQVPFETR	VGYGTSQSC*SLLPSQVPFETR	C	0.251074		Missed Filter (0.251074366619145; )	3.10501e+06	3695248	6.80026e+06
O15357_C926	O15357	KPAFTEASCPLSR	KPAFTEASC*PLSR	C	0.25142		Missed Filter (0.25141956433588; )	2.48281e+06	2955481	5.43829e+06
O43237_C191	O43237	DFQDYMEPEEGCQGSPQR	DFQDYMEPEEGC*QGSPQR	C	0.251519		Missed Filter (0.251519105805346; )	2.86935e+06	3.41584e+06	6.28519e+06
Q9UH62_C52	Q9UH62	MAEGGSGDVDDAGDCSGAR	MAEGGSGDVDDAGDC*SGAR	C	0.252344		Missed Filter (0.25234392327398; )	3.0715e+06	3658586	6.73008e+06
P04843_C477	P04843	VACITEQVLTLVNKR	VAC*ITEQVLTLVNKR	C	0.253003		Missed Filter (0.253002889478868; )	881528	1.0505e+06	1.93203e+06
Q8TD19_C11	Q8TD19	HCDSINSDFGSESGGCGDSSPGPSASQGPR	HC*DSINSDFGSESGGCGDSSPGPSASQGPR	C	0.253022		Missed Filter (0.253021939446577; )	3753387	4472914	8226301
Q96DT6_C65	Q96DT6	YEDEDKTLPAESGCTIEDHVIAGNVEEFRK	YEDEDKTLPAESGC*TIEDHVIAGNVEEFRK	C	-0.254517		Missed Filter (-0.254517491974585; )	509551	427140	936691
Q8WYP5_C1261	Q8WYP5	CAVPVETEWLK	C*AVPVETEWLK	C	-0.254541		Missed Filter (-0.254541291243133; )	746594	625835	1.37243e+06
Q14679_C952	Q14679	DLLNLAGFVLPNAEDIISSPSSCSSSTTSLPTSPGDK	DLLNLAGFVLPNAEDIISSPSSC*SSSTTSLPTSPGDK	C	0.254776		Missed Filter (0.254776344080802; )	816198	973848	1.79005e+06
Q9BWH6_C84	Q9BWH6	ARPSPGHCLPEDEDPEER	ARPSPGHC*LPEDEDPEER	C	0.256257		Missed Filter (0.256257359218466; )	2.00634e+06	2396329	4.40267e+06
Q9Y2H0_C726	Q9Y2H0	RDTDSDTQDANDSSCK	RDTDSDTQDANDSSC*K	C	0.25974		Missed Filter (0.25974039076403; )	2.30964e+06	2.76525e+06	5.07489e+06
O95239_C1159	O95239	TQDSEGSFKLEDPTEVTPGLSFFNPVCATPNSK	TQDSEGSFKLEDPTEVTPGLSFFNPVC*ATPNSK	C	-0.26092		Missed Filter (-0.260919675582189; )	2.12839e+06	1.77626e+06	3.90465e+06
Q13542_C35	Q13542	TVAISDAAQLPHDYCTTPGGTLFSTTPGGTR	TVAISDAAQLPHDYC*TTPGGTLFSTTPGGTR	C	0.261474		Missed Filter (0.261474454046929; )	1.6033e+06	1.92188e+06	3.52519e+06
Q71RG4_C166	Q71RG4	SEDSTCLPPSPGLITVR	SEDSTC*LPPSPGLITVR	C	0.26158		Missed Filter (0.261579903529289; )	23831892	28569454	52401346
Q96A49_C283	Q96A49	TQEDEEEISTSPGVSEFVSDAFDACNLNQEDLRK	TQEDEEEISTSPGVSEFVSDAFDAC*NLNQEDLRK	C	0.26165		Missed Filter (0.261649768533071; )	14909422	17874144	32783566
Q5T3I0_C152	Q5T3I0	ILTDEMLLQACEGR	ILTDEMLLQAC*EGR	C	0.261806		Missed Filter (0.261805984196207; )	2.25603e+06	2.70494e+06	4960969
P04150_C302	P04150	LGTVYCQASFPGANIIGNK	LGTVYC*QASFPGANIIGNK	C	0.262599		Missed Filter (0.26259885135697; )	2168357	2601243	4769600
O14980_C1070	O14980	QMSVPGIFNPHEIPEEMCD	QMSVPGIFNPHEIPEEMC*D	C	0.263548		Missed Filter (0.263548456376305; )	1.56253e+06	1.8757e+06	3.43823e+06
Q9Y6A5_C206	Q9Y6A5	VTPASETLEDPCR	VTPASETLEDPC*R	C	-0.264213		Missed Filter (-0.264212923687104; )	1.27405e+07	1.06151e+07	2.33556e+07
Q15398_C592	Q15398	IRQEECAETAVSVIPK	IRQEEC*AETAVSVIPK	C	0.264461		Missed Filter (0.264461213383346; )	1.23819e+06	1.4873e+06	2.72549e+06
Q9NPA3_C62	Q9NPA3	DVPLADPGLDNDVGVEVGGSGGCLEER	DVPLADPGLDNDVGVEVGGSGGC*LEER	C	0.26961		Missed Filter (0.26960997368766; )	2491325	3.00325e+06	5.49457e+06
P48506_C501	P48506	GGNAVVDGCGK	GGNAVVDGC*GK	C	0.270059		Missed Filter (0.270058877324506; )	10233527	12340170	22573697
P11274_C240	P11274	SSESSCGVDGDYEDAELNPR	SSESSC*GVDGDYEDAELNPR	C	0.270846		Missed Filter (0.270845940192194; )	5007424	6.04153e+06	1.1049e+07
Q9UKA4_C497	Q9UKA4	SISCEVLGSVLR	SISC*EVLGSVLR	C	0.271376		Missed Filter (0.271376252533574; )	1080519	1.30414e+06	2.38466e+06
P04920_C16	P04920	GADSFCTPEPESLGPGTPGFPEQEEDELHR	GADSFC*TPEPESLGPGTPGFPEQEEDELHR	C	0.271439		Missed Filter (0.271438822678202; )	1.04705e+07	12623766	2.30943e+07
Q96IZ6_C171	Q96IZ6	ISDLEICADEFPGSSATYR	ISDLEIC*ADEFPGSSATYR	C	0.2718		Missed Filter (0.271800248137902; )	2.4988e+06	3.01683e+06	5.51563e+06
Q05086_C198	Q05086	AACSAAAMEEDSEASSSR	AAC*SAAAMEEDSEASSSR	C	-0.272468		Missed Filter (-0.272468369478231; )	6484050	5368157	11852207
Q9UGP8_C490	Q9UGP8	EQSICAAEEQPAEDGQGETNK	EQSIC*AAEEQPAEDGQGETNK	C	0.273314		Missed Filter (0.273314131942291; )	5411117	6539773	11950890
Q14781_C222	Q14781	EACGGPSAMATPENLASLMK	EAC*GGPSAMATPENLASLMK	C	-0.274123		Missed Filter (-0.27412318559145; )	2048813	1.69427e+06	3.74308e+06
P78559_C2385	P78559	AENEEAAACPAWER	AENEEAAAC*PAWER	C	0.275088		Missed Filter (0.275087680946894; )	1.67972e+06	2.03257e+06	3.71229e+06
Q14694_C40	Q14694	SSVELPPYSGTVLCGTQAVDKLPDGQEYQR	SSVELPPYSGTVLC*GTQAVDKLPDGQEYQR	C	0.275415		Missed Filter (0.275415387384228; )	5152195	6235921	11388116
Q9BRT8_C394	Q9BRT8	FQEDQVCT	FQEDQVC*T	C	0.275697		Missed Filter (0.275697416799225; )	2.67327e+06	3236210	5.90948e+06
O60292_C18	O60292	AIPSDGVDLAASCGAR	AIPSDGVDLAASC*GAR	C	0.276322		Missed Filter (0.276321663655641; )	5217096	6318441	11535537
Q8NCE2_C562	Q8NCE2	SVDHPLPGSSLSTDYGSWQMVTGCGSIQER	SVDHPLPGSSLSTDYGSWQMVTGC*GSIQER	C	0.276705		Missed Filter (0.276704884154881; )	2.70684e+06	3.27914e+06	5985977
Q8ND83_C449	Q8ND83	IQSCIPSPGQLQHR	IQSC*IPSPGQLQHR	C	-0.276876		Missed Filter (-0.276875817782844; )	2912044	2.40353e+06	5.31558e+06
Q9NR09_C4828	Q9NR09	LPCPEGLDPDTDDAPEVCR	LPCPEGLDPDTDDAPEVC*R	C	0.277007		Missed Filter (0.277007242710307; )	1636571	1.983e+06	3.61957e+06
P05386_C61	P05386	ALANVNIGSLICNVGAGGPAPAAGAAPAGGPAPSTAAAPAEEK	ALANVNIGSLIC*NVGAGGPAPAAGAAPAGGPAPSTAAAPAEEK	C	0.277632		Missed Filter (0.277631632571889; )	5420561	6570822	11991383
Q9NS86_C169	Q9NS86	SDCESQECVTK	SDC*ESQECVTK	C	0.278385		Missed Filter (0.278385223347486; )	1.05268e+06	1.27673e+06	2.3294e+06
Q2NL82_C329	Q2NL82	DPDMAMEICATDAVDDMEEGLK	DPDMAMEIC*ATDAVDDMEEGLK	C	-0.279563		Missed Filter (-0.279562732795886; )	1457327	1.20061e+06	2.65793e+06
Q5H9R7_C830	Q5H9R7	LSTSQDAACKDAEECPETAEAK	LSTSQDAAC*KDAEECPETAEAK	C	0.279926		Missed Filter (0.27992621313804; )	1.66353e+06	2.01974e+06	3.68327e+06
Q8WXH0_C6739	Q8WXH0	GHGEDCIEAEEK	GHGEDC*IEAEEK	C	0.279927		Missed Filter (0.279927346342483; )	1.19716e+06	1453513	2.65067e+06
O15027_C107	O15027	DSSQGPCEPLPGPLTQPR	DSSQGPC*EPLPGPLTQPR	C	-0.280052		Missed Filter (-0.280051829369962; )	3.74548e+06	3.08463e+06	6.83011e+06
Q13370_C579	Q13370	NSDSNLCNSCGHQMLK	NSDSNLCNSC*GHQMLK	C	0.280574		Missed Filter (0.280573836001796; )	2.19069e+06	2.66098e+06	4.85166e+06
Q8NFG4_C215	Q8NFG4	VFEAEQFGCPQR	VFEAEQFGC*PQR	C	0.281245		Missed Filter (0.281244660992974; )	2.31951e+06	2818773	5.13829e+06
O95905_C557	O95905	SYMAQMDQELAHTCISK	SYMAQMDQELAHTC*ISK	C	0.282033		Missed Filter (0.282032577463189; )	9440811	11479146	20919957
Q6FI81_C251	Q6FI81	NCTCGLAEELEKEK	NCTC*GLAEELEKEK	C	0.28298		Missed Filter (0.282979516751447; )	7.25419e+06	8826209	1.60804e+07
O60566_C609	O60566	NVTICPNPEDTCDFAR	NVTICPNPEDTC*DFAR	C	0.28367		Missed Filter (0.283669710597338; )	2.98258e+06	3.63065e+06	6.61323e+06
Q9ULT8_C254	Q9ULT8	MAAAGGTVSGPSSACKPGR	MAAAGGTVSGPSSAC*KPGR	C	0.284892		Missed Filter (0.284892142814839; )	2.15849e+06	2.62973e+06	4788212
Q9BVX2_C54	Q9BVX2	DSITCLTCQGTGYIPTEQVNELVALIPHSDQR	DSITCLTC*QGTGYIPTEQVNELVALIPHSDQR	C	0.28507		Missed Filter (0.285069998328454; )	11859138	18240312	26309135
O15037_C245	O15037	ESLDTGSMGPGDCR	ESLDTGSMGPGDC*R	C	0.287588		Missed Filter (0.287588110816113; )	2.17843e+06	2658982	4.83741e+06
Q7Z417_C234	Q7Z417	GCENLNIVQDK	GC*ENLNIVQDK	C	0.288635		Missed Filter (0.288635465356907; )	2.69756e+06	3.29503e+06	5.99259e+06
P48634_C1821	P48634	NLDSGHCVPEPSSSGQR	NLDSGHC*VPEPSSSGQR	C	-0.289561		Missed Filter (-0.289560754527382; )	4.10498e+06	3.35849e+06	7.46347e+06
Q9Y3E2_C20	Q9Y3E2	VCLCQGSAGSGAIGPVEAAIR	VCLC*QGSAGSGAIGPVEAAIR	C	0.290092		Missed Filter (0.290091989904278; )	8411784	10285242	18697026
Q15047_C987	Q15047	VASWLSCNSVSEGGFADSDSHSSFK	VASWLSC*NSVSEGGFADSDSHSSFK	C	0.290261		Missed Filter (0.290261048504896; )	1.79604e+06	2196306	3.99234e+06
Q96I24_C460	Q96I24	SSGCFPNMAAK	SSGC*FPNMAAK	C	0.290592		Missed Filter (0.290592075940357; )	3.7292e+06	4561340	8.29054e+06
Q9Y3S1_C1635	Q9Y3S1	SEVCGGDLALPPVPK	SEVC*GGDLALPPVPK	C	0.290842		Missed Filter (0.290841913385607; )	1.68695e+06	2.06374e+06	3.75069e+06
Q17RS7_C866	Q17RS7	SYETAENEESCFPDSTK	SYETAENEESC*FPDSTK	C	0.292928		Missed Filter (0.292928200815795; )	2.7098e+06	3319844	6.02965e+06
Q96E22_C208	Q96E22	AAQDFCQLVAQK	AAQDFC*QLVAQK	C	-0.294261		Missed Filter (-0.294260790445205; )	3.19811e+06	2.60803e+06	5.80613e+06
Q9UQR0_C324	Q9UQR0	EKPLPVICSTSAASLK	EKPLPVIC*STSAASLK	C	0.295162		Missed Filter (0.295162018055314; )	3.24319e+06	3979464	7.22265e+06
O94806_C29	O94806	SVLPTAIPAVLPAASPCSSPK	SVLPTAIPAVLPAASPC*SSPK	C	-0.295984		Missed Filter (-0.295984092026305; )	2326622	1.89507e+06	4.22169e+06
Q9UHB9_C562	Q9UHB9	FETFCLDPSLVTK	FETFC*LDPSLVTK	C	-0.296861		Missed Filter (-0.296860829192654; )	2201052	1.7917e+06	3.99276e+06
A4D1P6_C246	A4D1P6	LGDSELAMVCSQR	LGDSELAMVC*SQR	C	0.297249		Missed Filter (0.297249070016944; )	1.34259e+06	1649775	2.99237e+06
P14923_C90	P14923	EAMCPGVSGEDSSLLLATQVEGQATNLQR	EAMC*PGVSGEDSSLLLATQVEGQATNLQR	C	0.298236		Missed Filter (0.298236009787565; )	889431	1.09368e+06	1.98311e+06
Q96L21_C105	Q96L21	MLSCAGADR	MLSC*AGADR	C	0.299397		Missed Filter (0.299397002709923; )	1.2647e+07	1.55493e+07	28196232
O95235_C43	O95235	NLLSDCSVVSTSLEDK	NLLSDC*SVVSTSLEDK	C	0.299783		Missed Filter (0.29978277800453; )	1148394	1413626	2562020
O75330_C17	O75330	FNDPSGCAPSPGAYDVK	FNDPSGC*APSPGAYDVK	C	-0.30045		Missed Filter (-0.300449997500591; )	10718098	8703086	19421184
Q9UBB4_C356	Q9UBB4	ETTNIFSNCGCVR	ETTNIFSNCGC*VR	C	-0.301609		Missed Filter (-0.301609441269241; )	8151475	6613673	14765148
Q9UGP4_C401	Q9UGP4	LSPTSLVHPVMSTLPELSCK	LSPTSLVHPVMSTLPELSC*K	C	0.301999		Missed Filter (0.301998621712834; )	954806	1.17713e+06	2.13194e+06
P52948_C1068	P52948	FTSGAFLSPSVSVQECR	FTSGAFLSPSVSVQEC*R	C	0.302181		Missed Filter (0.302180657638751; )	6.64468e+06	8.19294e+06	14837616
Q6P9F7_C195	Q6P9F7	ILLSSSGCSADIDSGK	ILLSSSGC*SADIDSGK	C	-0.303304		Missed Filter (-0.303303560467518; )	4.61658e+06	3.74125e+06	8.35782e+06
P27816_C126	P27816	MAYQEYPNSQNWPEDTNFCFQPEQVVDPIQTDPFK	MAYQEYPNSQNWPEDTNFC*FQPEQVVDPIQTDPFK	C	0.303604		Missed Filter (0.303604069813813; )	11321128	13972806	25293934
Q02952_C684	Q02952	VDTSVSWEALICVGSSK	VDTSVSWEALIC*VGSSK	C	-0.303887		Missed Filter (-0.303886649037482; )	3.14526e+06	2.54787e+06	5.69314e+06
Q86T24_C431	Q86T24	IITLDTATEIEGLSTGCK	IITLDTATEIEGLSTGC*K	C	0.303906		Missed Filter (0.303905719726486; )	1.10242e+06	1.36092e+06	2.46334e+06
Q96ME7_C324	Q96ME7	SEHGPISFFPESGQPECLK	SEHGPISFFPESGQPEC*LK	C	-0.304161		Missed Filter (-0.304160869159293; )	1.93346e+06	1.56594e+06	3.4994e+06
Q9Y5A9_C482	Q9Y5A9	SAVDYNTCAGVWSQDK	SAVDYNTC*AGVWSQDK	C	-0.304368		Missed Filter (-0.304368134744847; )	1.8473e+06	1.49593e+06	3343229
Q9Y4F5_C1570	Q9Y4F5	ASCGPPSLPDPTFLPDAER	ASC*GPPSLPDPTFLPDAER	C	-0.304427		Missed Filter (-0.30442717690787; )	1.44092e+06	1.1668e+06	2.60772e+06
Q12888_C489	Q12888	DGDMHSSSLTVECSK	DGDMHSSSLTVEC*SK	C	0.305715		Missed Filter (0.305714852468138; )	3.71939e+06	4597283	8.31667e+06
O43353_C414	O43353	TTPCSSAIINPLSTAGNSER	TTPC*SSAIINPLSTAGNSER	C	0.305832		Missed Filter (0.305831726221815; )	3448783	4263148	7711931
P49810_C65	P49810	SQENEEDGEEDPDRYVCSGVPGRPPGLEEELTLK	SQENEEDGEEDPDRYVC*SGVPGRPPGLEEELTLK	C	0.306588		Missed Filter (0.306587976620243; )	8498874	10511231	19010105
P53671_C173	P53671	GFSVSVESACSNYATTVQVK	GFSVSVESAC*SNYATTVQVK	C	-0.306707		Missed Filter (-0.306706885873568; )	7.03411e+06	5.7013e+06	1.27354e+07
Q7L590_C173	Q7L590	IQESTCFSAELDVPALPR	IQESTC*FSAELDVPALPR	C	0.306924		Missed Filter (0.306923898915493; )	998004	1.2346e+06	2.2326e+06
P78559_C1086	P78559	SPQAQEAPVNIDEGLTGCTIQLLPAQDK	SPQAQEAPVNIDEGLTGC*TIQLLPAQDK	C	0.309492		Missed Filter (0.309491737220924; )	4.17961e+06	5179173	9.35879e+06
Q86UL3_C325	Q86UL3	LPILIFPEGTCINNTSVMMFK	LPILIFPEGTC*INNTSVMMFK	C	0.310589		Missed Filter (0.310588514297135; )	609082	755392	1.36447e+06
Q13310_C494	Q13310	LAMDFGGAGAAQQGLTDSCQSGGVPTAVQNLAPR	LAMDFGGAGAAQQGLTDSC*QSGGVPTAVQNLAPR	C	0.311943		Missed Filter (0.311942702112381; )	8258160	12702365	18509660
P49711_C155	P49711	EGLAESEPMICHTLPLPEGFQVVK	EGLAESEPMIC*HTLPLPEGFQVVK	C	0.313205		Missed Filter (0.313204680560525; )	822859	1.02237e+06	1.84523e+06
O15234_C36	O15234	GGGSCSGSAGGGGSGSLPSQR	GGGSC*SGSAGGGGSGSLPSQR	C	-0.313603		Missed Filter (-0.313603133656993; )	1.71799e+06	1.38234e+06	3.10033e+06
Q5T6F2_C208	Q5T6F2	FSTQGMGTFNPADYSDSTSTDVCGTK	FSTQGMGTFNPADYSDSTSTDVC*GTK	C	0.314827		Missed Filter (0.314827026066105; )	1.66646e+06	2.07284e+06	3739301
Q9H4L5_C203	Q9H4L5	QNLFQTGSNVSFSCGGETR	QNLFQTGSNVSFSC*GGETR	C	-0.315218		Missed Filter (-0.315217784213991; )	2.09034e+06	1.68007e+06	3.77041e+06
P46013_C958	P46013	CAPMSDLTDLK	C*APMSDLTDLK	C	0.315683		Missed Filter (0.315683461755033; )	3034415	3.77664e+06	6.81105e+06
Q9UMZ2_C625	Q9UMZ2	NPLNLADLDMFSSVNCSSEKPLSFSAVFSTSK	NPLNLADLDMFSSVNC*SSEKPLSFSAVFSTSK	C	0.316865		Missed Filter (0.316865132789508; )	1.17325e+06	1.98226e+06	2634667
Q8N2F6_C59	Q8N2F6	SAGALEEGTSEGQLCGR	SAGALEEGTSEGQLC*GR	C	-0.318793		Missed Filter (-0.318793013837724; )	8305309	6.6587e+06	1.4964e+07
Q7Z3T8_C41	Q7Z3T8	LLDDFEQNPDEQDYLQDVQNAYDSNHCSVSSELASSQR	LLDDFEQNPDEQDYLQDVQNAYDSNHC*SVSSELASSQR	C	0.320142		Missed Filter (0.320141809575386; )	1515801	1.89241e+06	3.40821e+06
P10746_C14	P10746	DAKEDDCGQDPYIR	DAKEDDC*GQDPYIR	C	0.322593		Missed Filter (0.322593445504389; )	2.29277e+06	2867283	5.16005e+06
Q9C0C2_C1208	Q9C0C2	DMNLTGCLESGGSEEPGGIGVGEKDWTSDVNVK	DMNLTGC*LESGGSEEPGGIGVGEKDWTSDVNVK	C	0.323009		Missed Filter (0.323009391652198; )	1.91189e+06	2.39166e+06	4303550
Q92667_C438	Q92667	TYVSCLK	TYVSC*LK	C	0.323372		Missed Filter (0.32337202632903; )	6.2805e+06	7.85849e+06	14138992
A2VDJ0_C1073	A2VDJ0	NTIVFSNPSSECSMK	NTIVFSNPSSEC*SMK	C	0.32528		Missed Filter (0.32527978641718; )	3234627	4052688	7287315
Q147X3_C195	Q147X3	LLSSSLTADCSLR	LLSSSLTADC*SLR	C	-0.325785		Missed Filter (-0.325785206302502; )	1153543	920370	2.07391e+06
Q32MZ4_C742	Q32MZ4	CTLPEHESPSQDISDACEAESTER	CTLPEHESPSQDISDAC*EAESTER	C	0.327194		Missed Filter (0.327194485975508; )	1898662	2382007	4280669
Q14126_C840	Q14126	TLAEVCLGQK	TLAEVC*LGQK	C	0.327958		Missed Filter (0.327958394336873; )	1.59975e+06	2.00807e+06	3.60782e+06
Q8TF68_C42	Q8TF68	GCGLAPPHYPTLLTVPASVSLPSGISMDTESK	GC*GLAPPHYPTLLTVPASVSLPSGISMDTESK	C	0.33044		Missed Filter (0.330440153180555; )	1.95053e+06	2.45259e+06	4.40311e+06
Q53EZ4_C159	Q53EZ4	LSQTVAPNCFNSSINNIHEMEIQLK	LSQTVAPNC*FNSSINNIHEMEIQLK	C	0.331951		Missed Filter (0.331950881646804; )	1.59982e+06	2.01371e+06	3613531
Q07820_C16	Q07820	NAVIGLNLYCGGAGLGAGSGGATRPGGR	NAVIGLNLYC*GGAGLGAGSGGATRPGGR	C	-0.333537		Missed Filter (-0.333537048944718; )	1.54434e+06	1.22557e+06	2769916
P49790_C66	P49790	NEDVCSCSTDTSEVPR	NEDVC*SCSTDTSEVPR	C	0.334726		Missed Filter (0.334725698986342; )	2.62025e+06	3304494	5.92474e+06
Q9C0F1_C355	Q9C0F1	ASTVNYCGLNEISEETTIQK	ASTVNYC*GLNEISEETTIQK	C	0.335215		Missed Filter (0.335214642684209; )	1905220	2403559	4308779
Q15464_C204	Q15464	VESAAGGGAGDPLGGACAGGR	VESAAGGGAGDPLGGAC*AGGR	C	-0.336628		Missed Filter (-0.33662833278096; )	7.90469e+06	6259642	1.41643e+07
Q9H2G2_C358	Q9H2G2	ASSDLSIASSEEDKLSQNACILESVSEK	ASSDLSIASSEEDKLSQNAC*ILESVSEK	C	0.339901		Missed Filter (0.339901399802229; )	6.56803e+06	8.29026e+06	1.48583e+07
Q15365_C201	Q15365	CSDAAGYPHATHDLEGPPLDAYSIQGQHTISPLDLAK	C*SDAAGYPHATHDLEGPPLDAYSIQGQHTISPLDLAK	C	0.340166		Missed Filter (0.340165906795054; )	3758840	4.75832e+06	8.51716e+06
P35611_C430	P35611	YSDVEVPASVTGYSFASDGDSGTCSPLR	YSDVEVPASVTGYSFASDGDSGTC*SPLR	C	0.340702		Missed Filter (0.340702309416761; )	3.84665e+06	4871295	8.71795e+06
Q07065_C100	Q07065	SSSSSSASAAAAAAAASSSASCSR	SSSSSSASAAAAAAAASSSASC*SR	C	-0.342399		Missed Filter (-0.342398820329897; )	5600666	4.41741e+06	1.00181e+07
Q8NFQ8_C47	Q8NFQ8	DLENDPSVNSQAQETTIIASNAEEAEILHSACGLSK	DLENDPSVNSQAQETTIIASNAEEAEILHSAC*GLSK	C	0.344847		Missed Filter (0.344846530107444; )	3.78903e+07	4.81096e+07	85999877
P61106_C40	P61106	FMADCPHTIGVEFGTR	FMADC*PHTIGVEFGTR	C	0.344973		Missed Filter (0.344972960607802; )	1068931	1.35768e+06	2.42661e+06
Q7Z624_C25	Q7Z624	AAGGSPAVGCTTR	AAGGSPAVGC*TTR	C	0.345605		Missed Filter (0.345604819572615; )	7.87212e+06	9.90532e+06	17777437
P40763_C718	P40763	FICVTPTTCSNTIDLPMSPR	FICVTPTTC*SNTIDLPMSPR	C	0.346961		Missed Filter (0.34696070257149; )	3.48216e+06	4.42888e+06	7911045
Q12802_C418	Q12802	GTEGLSSCGNRNEETGTK	GTEGLSSC*GNRNEETGTK	C	0.348379		Missed Filter (0.34837926792652; )	1.82054e+06	2.31778e+06	4.13832e+06
Q8N9V3_C316	Q8N9V3	TVNIWQFDLETLCQAR	TVNIWQFDLETLC*QAR	C	0.349129		Missed Filter (0.349129343464354; )	533358	679387	1.21275e+06
O75410_C114	O75410	TCSKPSENEVPQQAIDSHSVK	TC*SKPSENEVPQQAIDSHSVK	C	0.352277		Missed Filter (0.352277052743683; )	2.80541e+06	3581315	6.38673e+06
Q96F86_C137	Q96F86	SQDVAVSPQQQQCSK	SQDVAVSPQQQQC*SK	C	0.352576		Missed Filter (0.352575565918644; )	3222642	4114792	7337434
P35453_C40	P35453	ADGGGAGGAPASSSSSSVAAAAASGQCR	ADGGGAGGAPASSSSSSVAAAAASGQC*R	C	0.354231		Missed Filter (0.354230815582566; )	965623	1.23436e+06	2.19998e+06
Q8WYP5_C1706	Q8WYP5	SKEITSDTMEQSIHETIPLVSQNIMCPTK	SKEITSDTMEQSIHETIPLVSQNIMC*PTK	C	-0.356335		Missed Filter (-0.356334902484699; )	5320989	4156472	9477461
Q09666_C5502	Q09666	SSGCDVNLPGVNVK	SSGC*DVNLPGVNVK	C	-0.358025		Missed Filter (-0.358025233367989; )	2187883	1707056	3894939
O15069_C191	O15069	TTYALLPACGPHGDAR	TTYALLPAC*GPHGDAR	C	0.358788		Missed Filter (0.35878760275257; )	3.23696e+06	4.1509e+06	7.38786e+06
Q53T59_C287	Q53T59	LFDDPDLGGAIPLGDSLLLPAACESGGPTPSLSHR	LFDDPDLGGAIPLGDSLLLPAAC*ESGGPTPSLSHR	C	0.360088		Missed Filter (0.360087936422552; )	4319498	5.54409e+06	9.86359e+06
O95235_C270	O95235	IGTSTSFDSGIAGLSSISQCTSSSQLDETSHR	IGTSTSFDSGIAGLSSISQC*TSSSQLDETSHR	C	0.361717		Missed Filter (0.36171732852043; )	2.07847e+06	2.67075e+06	4.74922e+06
Q7Z3D4_C174	Q7Z3D4	CTDNKRENLNEVVSALTAQQMR	C*TDNKRENLNEVVSALTAQQMR	C	0.363432		Missed Filter (0.363432314667421; )	1485669	1.91129e+06	3.39696e+06
Q96JQ2_C438	Q96JQ2	TVHFEADTYKDPFCSK	TVHFEADTYKDPFC*SK	C	0.364069		Missed Filter (0.364069191014193; )	5.29748e+06	6812781	1.21103e+07
P29372_C61	P29372	CLGPPTTPGPYR	C*LGPPTTPGPYR	C	-0.365425		Missed Filter (-0.36542477959852; )	4557778	3537931	8095709
Q9C0C2_C1337	Q9C0C2	GCGVGQMDWTQDLAPQNVELFGAPSEAR	GC*GVGQMDWTQDLAPQNVELFGAPSEAR	C	0.366698		Missed Filter (0.366697733786246; )	2.0111e+06	3.36145e+06	4604216
Q12802_C536	Q12802	ISVPNCAPAASSLDGNKPAESSLAFSNEETSTEK	ISVPNC*APAASSLDGNKPAESSLAFSNEETSTEK	C	0.367609		Missed Filter (0.367608846063734; )	2.17982e+06	2812437	4.99226e+06
Q9NYJ1_C64	Q9NYJ1	DCMSEQQAR	DC*MSEQQAR	C	0.367776		Missed Filter (0.367775858681099; )	2.3229e+06	2.99738e+06	5.32028e+06
Q6UVJ0_C525	Q6UVJ0	LTYPTCGIGYPVSSAFAFQNTFPHSISAK	LTYPTC*GIGYPVSSAFAFQNTFPHSISAK	C	0.369721		Missed Filter (0.369720680343241; )	5817394	7.51611e+06	1.33335e+07
P13639_C466	P13639	YVEPIEDVPCGNIVGLVGVDQFLVK	YVEPIEDVPC*GNIVGLVGVDQFLVK	C	0.369841		Missed Filter (0.369841324181136; )	814361	1.05233e+06	1.86669e+06
Q9Y285_C493	Q9Y285	VNLQMVYDSPLCR	VNLQMVYDSPLC*R	C	-0.374075		Missed Filter (-0.374075493749531; )	1.2054e+06	930086	2.13548e+06
P28290_C599	P28290	SGSQDFPQCNTIENTGTK	SGSQDFPQC*NTIENTGTK	C	-0.376104		Missed Filter (-0.376103666804859; )	1.53812e+06	1185142	2.72326e+06
Q96EI5_C34	Q96EI5	KPEVTCTLEDK	KPEVTC*TLEDK	C	0.376971		Missed Filter (0.376970709227697; )	3.66375e+06	4757795	8.42155e+06
Q6FI81_C277	Q6FI81	SACGNCYLGDAFR	SACGNC*YLGDAFR	C	-0.377333		Missed Filter (-0.377333155031033; )	2118618	1.63104e+06	3.74966e+06
Q14573_C1558	Q14573	AILLPMDLDAHISSMLSSGASCAAAAQR	AILLPMDLDAHISSMLSSGASC*AAAAQR	C	0.379401		Missed Filter (0.379400655077873; )	4.97189e+06	6.46709e+06	1.1439e+07
Q9P107_C958	Q9P107	ATCCPDVQPEEAEDHL	ATCC*PDVQPEEAEDHL	C	-0.380124		Missed Filter (-0.380124380150986; )	1.4095e+06	1.08302e+06	2492526
Q9NUQ6_C185	Q9NUQ6	SDGLQWSAEQPCNPSKPK	SDGLQWSAEQPC*NPSKPK	C	0.381507		Missed Filter (0.381507174224077; )	3.25853e+06	4.2449e+06	7503432
Q14964_C41	Q14964	SPACDPTVGVDFFSR	SPAC*DPTVGVDFFSR	C	0.38158		Missed Filter (0.381580047391226; )	3696105	4815167	8511272
Q9Y2X7_C576	Q9Y2X7	GVSASAVPFTPSSPLLSCSQEGSR	GVSASAVPFTPSSPLLSC*SQEGSR	C	0.382686		Missed Filter (0.382686158510731; )	1.00902e+06	1.31553e+06	2.32455e+06
Q9Y5K6_C540	Q9Y5K6	DTCYSPKPSVYLSTPSSASK	DTC*YSPKPSVYLSTPSSASK	C	-0.382694		Missed Filter (-0.382693520324393; )	8.37247e+06	6.42172e+06	14794182
Q99570_C899	Q99570	SESSAGICVPLSTSSQVPEVTTVQNK	SESSAGIC*VPLSTSSQVPEVTTVQNK	C	0.385103		Missed Filter (0.385103400198309; )	2.97537e+06	3.88569e+06	6.86106e+06
Q9Y4C1_C304	Q9Y4C1	EILLGCTAATPPSKDPR	EILLGC*TAATPPSKDPR	C	-0.389126		Missed Filter (-0.389126097868928; )	1.6472e+06	1.25779e+06	2.90498e+06
Q9BSJ8_C611	Q9BSJ8	ILYLDSSEICFPTVPGCPGAWDVDSENPQR	ILYLDSSEICFPTVPGC*PGAWDVDSENPQR	C	0.390718		Missed Filter (0.390718401061327; )	2.11684e+06	2772067	4.88891e+06
P08069_C1367	P08069	ALPLPQSSTC	ALPLPQSSTC*	C	-0.391048		Missed Filter (-0.391047787618781; )	1390293	1.0602e+06	2.4505e+06
P13797_C104	P13797	EGICALGGTSELSSEGTQHSYSEEEK	EGIC*ALGGTSELSSEGTQHSYSEEEK	C	0.391443		Missed Filter (0.391442882777485; )	6324704	4.75911e+06	8.39018e+06
Q9Y6D5_C613	Q9Y6D5	CSVTSMESTVSSGTQTTVQDDPEQFEVIK	C*SVTSMESTVSSGTQTTVQDDPEQFEVIK	C	0.392369		Missed Filter (0.392369180438588; )	759260	996564	1.75582e+06
Q9NVN8_C490	Q9NVN8	IGDLTGYCTNPNR	IGDLTGYC*TNPNR	C	0.393487		Missed Filter (0.393487085697205; )	1.25378e+06	1.64692e+06	2.90071e+06
O15027_C359	O15027	THHPLGAGAGSGCAPLEADSGASGALAMFFQGGETENEENLSSEK	THHPLGAGAGSGC*APLEADSGASGALAMFFQGGETENEENLSSEK	C	0.40039		Missed Filter (0.40038957886642; )	1.05958e+07	1.39848e+07	24580652
Q96FF9_C185	Q96FF9	SCFGFEGLLGAEDLSGVSPVVCSK	SCFGFEGLLGAEDLSGVSPVVC*SK	C	0.401362		Missed Filter (0.401362225787111; )	546952	722389	1269341
Q9Y561_C692	Q9Y561	VPPTTAVEATVGACASSSTQSTR	VPPTTAVEATVGAC*ASSSTQSTR	C	0.407719		Missed Filter (0.407718742533348; )	2.2616e+06	2.99295e+06	5.25455e+06
Q16799_C113	Q16799	DGEGSCYTSLISDICYPPQEDSTYFTGILQK	DGEGSCYTSLISDIC*YPPQEDSTYFTGILQK	C	-0.408221		Missed Filter (-0.408220758520617; )	5399389	4068721	9468110
Q04917_C112	Q04917	NCNDFQYESK	NC*NDFQYESK	C	0.411041		Missed Filter (0.411040508197943; )	1.35204e+06	1.79774e+06	3.14978e+06
Q7Z3T8_C66	Q7Z3T8	DQECVNSCASSETSYGTNESSLNEK	DQECVNSC*ASSETSYGTNESSLNEK	C	0.411229		Missed Filter (0.411228563341902; )	2930029	3.8964e+06	6.82643e+06
O60934_C478	O60934	ERDEENQEMSSCK	ERDEENQEMSSC*K	C	0.412625		Missed Filter (0.412625275887559; )	4354469	5796259	10150728
Q9H6S0_C1265	Q9H6S0	STDSSSYPSPCASPSPPSSGK	STDSSSYPSPC*ASPSPPSSGK	C	-0.414961		Missed Filter (-0.414960911704577; )	6.48745e+06	4.86585e+06	11353302
Q8IXW5_C185	Q8IXW5	EEQSGHSGEEVQLCSK	EEQSGHSGEEVQLC*SK	C	0.415112		Missed Filter (0.415111578903747; )	2.2076e+06	2.94362e+06	5.15123e+06
Q96ME7_C540	Q96ME7	NNEELVVSASCKEPEQEPVPAQFQK	NNEELVVSASC*KEPEQEPVPAQFQK	C	0.416041		Missed Filter (0.416040841054581; )	1.28797e+06	1718486	3.00645e+06
Q5H9R7_C605	Q5H9R7	VSDINFTLNTNESGNIALFEACCK	VSDINFTLNTNESGNIALFEACC*K	C	0.416044		Missed Filter (0.416044063483822; )	1.99059e+06	2655973	4.64656e+06
Q6PJW8_C317	Q6PJW8	TCLGTESSK	TC*LGTESSK	C	0.416073		Missed Filter (0.41607345170635; )	815460	1.08806e+06	1.90352e+06
Q8TDY2_C282	Q8TDY2	ESCQSTVHQQDETTIDTK	ESC*QSTVHQQDETTIDTK	C	-0.419621		Missed Filter (-0.419621346652431; )	2.6803e+06	2.00384e+06	4.68414e+06
Q5VV42_C138	Q5VV42	IVLAGCVPQAQPR	IVLAGC*VPQAQPR	C	0.42306		Missed Filter (0.423059984764367; )	606207	812784	1.41899e+06
Q9Y3S1_C1153	Q9Y3S1	ELSDSCEGAFGGGR	ELSDSC*EGAFGGGR	C	0.425578		Missed Filter (0.425578324656004; )	544887	731843	1.27673e+06
Q96T23_C1436	Q96T23	VTDLVDYVCNSEQL	VTDLVDYVC*NSEQL	C	0.426149		Missed Filter (0.42614879373922; )	675988	908286	1.58427e+06
Q9H582_C152	Q9H582	GSVSLTTGQPVDQPTTESCSTLK	GSVSLTTGQPVDQPTTESC*STLK	C	-0.426908		Missed Filter (-0.426908406283984; )	2.22929e+06	1.65826e+06	3887550
Q8IWJ2_C889	Q8IWJ2	LENQNLLIQVEEVSQTCSK	LENQNLLIQVEEVSQTC*SK	C	0.427558		Missed Filter (0.427558304772722; )	1.37281e+06	1.84637e+06	3.21918e+06
Q6ZN17_C187	Q6ZN17	QEAESQPCTSTLPR	QEAESQPC*TSTLPR	C	0.430715		Missed Filter (0.430714607264547; )	1.51561e+07	2.03972e+07	3.55533e+07
Q8IWU2_C763	Q8IWU2	NAGFTEAMLETSCR	NAGFTEAMLETSC*R	C	0.430888		Missed Filter (0.430887529410882; )	1.54111e+06	2.07751e+06	3.61861e+06
B0YJ81_C36	B0YJ81	CAATMASSDEDGTNGGASEAGEDR	C*AATMASSDEDGTNGGASEAGEDR	C	0.435241		Missed Filter (0.435241174800551; )	1.4051e+06	1.89989e+06	3.30499e+06
Q8N8Q9_C340	Q8N8Q9	AMNGNLSNMYEVLNNNEESLTCGIEQHTGENVSR	AMNGNLSNMYEVLNNNEESLTC*GIEQHTGENVSR	C	0.437152		Missed Filter (0.437152385680706; )	2995197	4055285	7050482
Q9BRT3_C33	Q9BRT3	IVVEYCEPCGFEATYLELASAVK	IVVEYCEPC*GFEATYLELASAVK	C	-0.440952		Missed Filter (-0.440952176316827; )	1584534	1.16724e+06	2.75178e+06
Q9NYK6_C183	Q9NYK6	ENTDFGLSMLQDSGATLCR	ENTDFGLSMLQDSGATLC*R	C	0.443435		Missed Filter (0.443434800222622; )	1.03402e+06	1406099	2.44012e+06
Q8IZ07_C540	Q8IZ07	AIQESLLTSTEGLCPSALSETSR	AIQESLLTSTEGLC*PSALSETSR	C	0.445677		Missed Filter (0.445676812871033; )	1109968	1.51172e+06	2.62169e+06
Q7Z401_C1137	Q7Z401	AGCVATQNPK	AGC*VATQNPK	C	0.449799		Missed Filter (0.449799275088066; )	3.08868e+06	2.78895e+06	4.83087e+06
Q13572_C391	Q13572	LGCNAGVSPSFQQHCVASLATK	LGC*NAGVSPSFQQHCVASLATK	C	0.451066		Missed Filter (0.451066004699478; )	3784045	5157534	8941579
Q5T1M5_C1031	Q5T1M5	DGSLPPELSCIPSHR	DGSLPPELSC*IPSHR	C	0.452262		Missed Filter (0.452261604211429; )	2.61379e+06	3576138	6.18992e+06
Q92625_C866	Q92625	CQDLLSQTSSPLSQNDSCTGR	CQDLLSQTSSPLSQNDSC*TGR	C	-0.456091		Missed Filter (-0.456091318156162; )	3.58037e+06	2.60994e+06	6.19031e+06
Q08378_C455	Q08378	LQAQVECSHSSQQR	LQAQVEC*SHSSQQR	C	0.459264		Missed Filter (0.459263753804474; )	1.31153e+06	1.80315e+06	3.11468e+06
Q13615_C928	Q13615	EGLVCNGAPETENR	EGLVC*NGAPETENR	C	0.459695		Missed Filter (0.459695259585254; )	881346	1.21207e+06	2.09342e+06
Q5UIP0_C1187	Q5UIP0	KTSTECASSTENSFVVSSSSVSNTTVAGTPPYPTSR	KTSTEC*ASSTENSFVVSSSSVSNTTVAGTPPYPTSR	C	0.464701		Missed Filter (0.464701162672261; )	1723498	2.37848e+06	4.10198e+06
O60566_C499	O60566	IPGMTLSSSVCQVNCCAR	IPGMTLSSSVC*QVNCCAR	C	0.466396		Missed Filter (0.466396026546609; )	3.65512e+06	5.05011e+06	8.70523e+06
Q9UPY3_C1153	Q9UPY3	TSSLENHDQMSVNCR	TSSLENHDQMSVNC*R	C	0.467872		Missed Filter (0.467871556484392; )	3525236	4.87564e+06	8.40088e+06
O43683_C689	O43683	LSQPAAGGVLTCEAELGVEACR	LSQPAAGGVLTC*EAELGVEACR	C	0.468049		Missed Filter (0.468049239841292; )	2.476e+06	3.4249e+06	5.9009e+06
P42898_C14	P42898	GNSSLNPCLEGSASSGSESSK	GNSSLNPC*LEGSASSGSESSK	C	0.469545		Missed Filter (0.469544692529268; )	902064	1.24906e+06	2.15113e+06
Q9UNY4_C512	Q9UNY4	SACQVTAGGSSQCYR	SAC*QVTAGGSSQCYR	C	-0.46963		Missed Filter (-0.469629623653919; )	8697015	6280549	14977564
Q96RT8_C580	Q96RT8	NLQCAESTTCQAGAR	NLQCAESTTC*QAGAR	C	0.469902		Missed Filter (0.469901984852323; )	1.67322e+06	2.31744e+06	3990662
P46013_C773	P46013	EQPQLTSTCHIAISNSENLLGK	EQPQLTSTC*HIAISNSENLLGK	C	-0.469944		Missed Filter (-0.46994354431583; )	3893854	1.10309e+06	2.63092e+06
Q96SK2_C158	Q96SK2	FTTSCMTGYSPQLQGLSSGGSGSYSPGVTYSPVSGYNK	FTTSC*MTGYSPQLQGLSSGGSGSYSPGVTYSPVSGYNK	C	0.474923		Missed Filter (0.47492339333727; )	5614907	7803847	13418754
Q96II8_C558	Q96II8	SQHTDDSALCMSLSGLNQVGCAATLPHSSAFTPLK	SQHTDDSALCMSLSGLNQVGC*AATLPHSSAFTPLK	C	0.476056		Missed Filter (0.476056057531281; )	1.29099e+06	1.79568e+06	3.08667e+06
O94898_C1035	O94898	EPDCSASSMSCHR	EPDC*SASSMSCHR	C	-0.479005		Missed Filter (-0.479005290981124; )	1.24242e+06	891405	2.13383e+06
P42356_C19	P42356	GGGGGGGGGGGCSGSGSSASR	GGGGGGGGGGGC*SGSGSSASR	C	-0.485526		Missed Filter (-0.485526116171134; )	1869270	1335101	3204371
Q06124_C567	Q06124	YSLADQTSGDQSPLPPCTPTPPCAEMR	YSLADQTSGDQSPLPPC*TPTPPCAEMR	C	0.487238		Missed Filter (0.487237503094713; )	7839923	10989676	18829599
P49327_C2202	P49327	ADEASELACPTPK	ADEASELAC*PTPK	C	0.487956		Missed Filter (0.487955923438211; )	2.40763e+06	3.37659e+06	5.78421e+06
O15069_C126	O15069	IVMGEETCQALLSPR	IVMGEETC*QALLSPR	C	0.488194		Missed Filter (0.488193682616663; )	2789829	3.91326e+06	6.70309e+06
Q9UPQ9_C202	Q9UPQ9	VIVDGSDMEEWPCIASK	VIVDGSDMEEWPC*IASK	C	0.491258		Missed Filter (0.491258112420982; )	1.75534e+06	2.46744e+06	4.22278e+06
Q9UBB6_C22	Q9UBB6	ASIMASDCEPALNQAEGR	ASIMASDC*EPALNQAEGR	C	0.494955		Missed Filter (0.494954925305761; )	2573719	3.62708e+06	6.2008e+06
Q9Y6Y0_C274	Q9Y6Y0	QISSSSTGCLSSPNATVQSPK	QISSSSTGC*LSSPNATVQSPK	C	0.495127		Missed Filter (0.495127107983309; )	2796683	3.94177e+06	6.73845e+06
Q14318_C295	Q14318	SCSLVLEHQPDNIK	SC*SLVLEHQPDNIK	C	0.496115		Missed Filter (0.496115266046111; )	1.29633e+06	1.82836e+06	3.12469e+06
P49137_C224	P49137	ETTSHNSLTTPCYTPYYVAPEVLGPEK	ETTSHNSLTTPC*YTPYYVAPEVLGPEK	C	0.505199		Missed Filter (0.505198913917232; )	1.64684e+06	2.33739e+06	3.98422e+06
Q99941_C171	Q99941	IEPVSPCSSVNSEASLLSADSSSQAFIGEEVLEVK	IEPVSPC*SSVNSEASLLSADSSSQAFIGEEVLEVK	C	0.510884		Missed Filter (0.510884105427803; )	5.38319e+06	7.53014e+06	1.29133e+07
Q9Y4P8_C393	Q9Y4P8	LDGSLETTNEILDSASHDCPLVTQTYGAAAGK	LDGSLETTNEILDSASHDC*PLVTQTYGAAAGK	C	0.512744		Missed Filter (0.512744079025547; )	3.78515e+06	5.40051e+06	9.18566e+06
Q16799_C471	Q16799	EAELDSELIIESCDASSASEESPKR	EAELDSELIIESC*DASSASEESPKR	C	-0.516995		Missed Filter (-0.516995288233563; )	3778926	2.64518e+06	6.4241e+06
Q12802_C667	Q12802	SSPICSTTGDDKLCADSACQQNTVTSSGDLVAK	SSPICSTTGDDKLCADSAC*QQNTVTSSGDLVAK	C	0.517787		Missed Filter (0.517786509899762; )	2.09455e+06	2.99889e+06	5.09343e+06
Q96RL1_C121	Q96RL1	AIAESLNSCRPSDASATR	AIAESLNSC*RPSDASATR	C	-0.518933		Missed Filter (-0.51893265833314; )	2.24195e+06	1.56463e+06	3.80658e+06
Q9UPV0_C437	Q9UPV0	ISEHLLDVDVLSPVLGGACR	ISEHLLDVDVLSPVLGGAC*R	C	0.522588		Missed Filter (0.522588475081491; )	200271	287696	487967
A0FGR8_C181	A0FGR8	ACDLPAWVHFPDTER	AC*DLPAWVHFPDTER	C	0.531479		Missed Filter (0.531478555864683; )	859522	1.24236e+06	2101884
Q8NG27_C241	Q8NG27	APVSICGGGENTSK	APVSIC*GGGENTSK	C	-0.534241		Missed Filter (-0.534240932997023; )	8.74187e+06	5.17424e+06	1.26675e+07
Q9H4B6_C51	Q9H4B6	RTDICLPDSSPNAFSTSGDVVSR	RTDIC*LPDSSPNAFSTSGDVVSR	C	-0.54036		Missed Filter (-0.540359515735787; )	1.12619e+06	774366	1.90055e+06
P33981_C295	P33981	TDDSVVPCFMK	TDDSVVPC*FMK	C	-0.545645		Missed Filter (-0.545644974780802; )	2.26672e+06	1.5529e+06	3819619
Q9NS86_C49	Q9NS86	AFVNPFPDYEAAAGALLASGAAEETGCVRPPATTDEPGLPFHQDGK	AFVNPFPDYEAAAGALLASGAAEETGC*VRPPATTDEPGLPFHQDGK	C	0.553858		Missed Filter (0.553857762157216; )	2144599	3148284	5292883
Q9Y289_C628	Q9Y289	DKEAMALDGTAYQGSSSTCILQETSL	DKEAMALDGTAYQGSSSTC*ILQETSL	C	0.558708		Missed Filter (0.558708323529033; )	2.55915e+06	3.7695e+06	6.32864e+06
Q86U28_C79	Q86U28	LQVEGGGCSGFQYK	LQVEGGGC*SGFQYK	C	-0.559534		Missed Filter (-0.559533661597992; )	1.79657e+06	1.21901e+06	3.01558e+06
Q86UV5_C1021	Q86UV5	ADEPIADYAAMDDVMQVCMPEEGFK	ADEPIADYAAMDDVMQVC*MPEEGFK	C	-0.559746		Missed Filter (-0.55974582889638; )	1.17562e+06	797564	1.97318e+06
Q8TEU7_C1293	Q8TEU7	CSSQALAVPESTGALEK	C*SSQALAVPESTGALEK	C	0.559851		Missed Filter (0.55985060812562; )	1976612	2.91376e+06	4.89037e+06
Q14534_C115	Q14534	GTNISETSLIGTAACTSTSSQNDPEVIIVGAGVLGSALAAVLSR	GTNISETSLIGTAAC*TSTSSQNDPEVIIVGAGVLGSALAAVLSR	C	0.564004		Missed Filter (0.564003620314915; )	4.33917e+06	6.4147e+06	1.07539e+07
Q8TD19_C975	Q8TD19	GTQTAKEEMEMDPKPDLDSDSWCLLGTDSCRPSL	GTQTAKEEMEMDPKPDLDSDSWCLLGTDSC*RPSL	C	0.566807		Missed Filter (0.566806724659383; )	3700867	5481877	9182744
Q96AG4_C59	Q96AG4	LTTLPSDFCGLTHLVK	LTTLPSDFC*GLTHLVK	C	0.570699		Missed Filter (0.570699300367701; )	876813	1.30228e+06	2.17909e+06
Q9BTE3_C200	Q9BTE3	QAGSVGGLQWCGEPK	QAGSVGGLQWC*GEPK	C	0.578007		Missed Filter (0.578007409311017; )	3.58641e+06	5.35374e+06	8940144
Q5JSZ5_C1482	Q5JSZ5	SPDEALPGGLSGCSSGSGHSPYALER	SPDEALPGGLSGC*SSGSGHSPYALER	C	-0.581465		Missed Filter (-0.581464614862285; )	12337737	8.62421e+06	2.0962e+07
Q14151_C361	Q14151	KFDFDACNEVPPAPK	KFDFDAC*NEVPPAPK	C	0.581851		Missed Filter (0.581850962599676; )	6166518	9229849	15396367
O15027_C46	O15027	RANNNAAVAPTTCPLQPVTDPFAFSR	RANNNAAVAPTTC*PLQPVTDPFAFSR	C	0.58972		Missed Filter (0.589720332439485; )	1.7345e+06	2.60392e+06	4338423
Q16352_C54	Q16352	SNVASSAACSSASSLGLGLAYR	SNVASSAAC*SSASSLGLGLAYR	C	0.59014		Missed Filter (0.590139852487973; )	4132465	6.22098e+06	1.03534e+07
P51957_C664	P51957	LSSDCSVTQER	LSSDC*SVTQER	C	-0.590365		Missed Filter (-0.590365378957556; )	2.61179e+06	1.73468e+06	4.34647e+06
P48634_C437	P48634	GGPPCKPPAPEDEDEAWR	GGPPC*KPPAPEDEDEAWR	C	0.590917		Missed Filter (0.590917304458424; )	2.96765e+06	4469883	7.43753e+06
Q02952_C1521	Q02952	WKSDEVDEQVACQEVK	WKSDEVDEQVAC*QEVK	C	0.607871		Missed Filter (0.607870735468654; )	4.00408e+06	6102244	1.01063e+07
Q9Y287_C38	Q9Y287	SGEEALIIPPDAVAVDCK	SGEEALIIPPDAVAVDC*K	C	-0.608127		Missed Filter (-0.608126852239243; )	1.4578e+06	956386	2.41419e+06
Q7L804_C296	Q7L804	MNQPDSIVDEGELCFGR	MNQPDSIVDEGELC*FGR	C	-0.610566		Missed Filter (-0.610566117257531; )	3287904	2.15338e+06	5.44128e+06
Q96PE3_C565	Q96PE3	LHGEGCEDVFPCAGSCTSK	LHGEGCEDVFPC*AGSCTSK	C	0.615705		Missed Filter (0.615704725993478; )	2171519	3.32743e+06	5.49895e+06
Q9NV96_C17	Q9NV96	DEVDGGPPCAPGGTAK	DEVDGGPPC*APGGTAK	C	-0.616549		Missed Filter (-0.616548558596848; )	13759489	8974344	22733833
Q96EX3_C65	Q96EX3	SCQTASIATASASAQAR	SC*QTASIATASASAQAR	C	0.61726		Missed Filter (0.617259615583566; )	1215166	1.86401e+06	3.07918e+06
Q9UBF8_C89	Q9UBF8	CLDDPPAQIREEEDEMGAAVASGTAK	C*LDDPPAQIREEEDEMGAAVASGTAK	C	0.6207		Missed Filter (0.620700076718611; )	1.42078e+06	2.18462e+06	3.6054e+06
Q5TAX3_C746	Q5TAX3	SNNMATNGCILLGETTEK	SNNMATNGC*ILLGETTEK	C	0.623377		Missed Filter (0.6233767309498; )	775134	1.19408e+06	1.96921e+06
Q9NX70_C131	Q9NX70	LAHECLSQSCDSAK	LAHECLSQSC*DSAK	C	-0.631015		Missed Filter (-0.631014710025157; )	2539884	1.64006e+06	4.17994e+06
O14867_C263	O14867	SENECLGGVPECR	SENEC*LGGVPECR	C	0.640771		Missed Filter (0.640770633206569; )	1.00457e+06	1.56628e+06	2.57085e+06
Q58WW2_C593	Q58WW2	SCGVPEESASSEK	SC*GVPEESASSEK	C	0.64085		Missed Filter (0.640849609108236; )	608651	949037	1.55769e+06
Q92574_C306	Q92574	SADVTTSPYADTQNSYGCATSTPYSTSR	SADVTTSPYADTQNSYGC*ATSTPYSTSR	C	0.641194		Missed Filter (0.641193699452566; )	2217956	3.45917e+06	5.67712e+06
P26358_C1125	P26358	SQACEPSEPEIEIK	SQAC*EPSEPEIEIK	C	0.641743		Missed Filter (0.641743411979285; )	725588	1.13207e+06	1.85766e+06
Q14980_C160	Q14980	APVPSTCSSTFPEELSPPSHQAK	APVPSTC*SSTFPEELSPPSHQAK	C	0.643771		Missed Filter (0.643770773782486; )	2.60168e+06	4.06489e+06	6.66657e+06
Q14671_C1179	Q14671	NGVDLGPICGPPNGII	NGVDLGPIC*GPPNGII	C	0.643803		Missed Filter (0.643803245664021; )	580449	906919	1.48737e+06
Q5T5Y3_C719	Q5T5Y3	LYVSCSK	LYVSC*SK	C	-0.656134		Missed Filter (-0.656134271593153; )	2.15579e+06	1.36801e+06	3.5238e+06
C9JVW0_C6	C9JVW0	GTSCVGGGAESPGGAGLSEGPR	GTSC*VGGGAESPGGAGLSEGPR	C	0.658773		Missed Filter (0.658772616005146; )	1.69389e+06	2.67421e+06	4.3681e+06
Q86TP1_C437	Q86TP1	CSQISLSQSTTASLSK	C*SQISLSQSTTASLSK	C	0.659006		Missed Filter (0.659006375281323; )	1.52835e+06	2.41325e+06	3.9416e+06
Q14694_C115	Q14694	EASYGSIDCQYPGSALALDGSSNVEAEVLENDGVSGGLGQR	EASYGSIDC*QYPGSALALDGSSNVEAEVLENDGVSGGLGQR	C	0.663275		Missed Filter (0.663274693082025; )	1.69101e+06	2.67801e+06	4.36902e+06
Q86XS8_C320	Q86XS8	ALGIVPNLPCTDNVAFDMER	ALGIVPNLPC*TDNVAFDMER	C	0.663726		Missed Filter (0.663725735786346; )	1.45066e+06	2298083	3.74874e+06
O75534_C464	O75534	EAEDGIIAYDDCGVK	EAEDGIIAYDDC*GVK	C	-0.664302		Missed Filter (-0.664301894147009; )	3.81734e+06	2.40872e+06	6.22606e+06
O00180_C329	O00180	QNEPFVATQSSACVDGPANH	QNEPFVATQSSAC*VDGPANH	C	0.67428		Missed Filter (0.674280428347825; )	996199	1.58973e+06	2.58593e+06
Q9P246_C679	Q9P246	SCSMNQLSSGIPVPKPR	SC*SMNQLSSGIPVPKPR	C	0.675953		Missed Filter (0.675952619414451; )	1.36096e+06	2174340	3.5353e+06
Q96EK7_C404	Q96EK7	REVPMCSDPEPR	REVPMC*SDPEPR	C	-0.690048		Missed Filter (-0.690048129755055; )	1.36983e+06	849063	2.21889e+06
Q5JSZ5_C852	Q5JSZ5	CSPLEPDFVPDEK	C*SPLEPDFVPDEK	C	0.719051		Missed Filter (0.719051184593034; )	1.26592e+06	2.08383e+06	3.34975e+06
O14497_C336	O14497	GPADMASQCWGAAAAAAAAAAASGGAQQR	GPADMASQC*WGAAAAAAAAAAASGGAQQR	C	0.72383		Missed Filter (0.723829962841632; )	208924	345050	553974
O15530_C21	O15530	TTSQLYDAVPIQSSVVLCSCPSPSMVR	TTSQLYDAVPIQSSVVLC*SCPSPSMVR	C	0.727007		Missed Filter (0.727006687562179; )	1.86983e+06	3.09405e+06	4.96388e+06
Q6Y2X3_C422	Q6Y2X3	YCQPEEEVAR	YC*QPEEEVAR	C	0.740277		Missed Filter (0.740276928677818; )	2.32902e+06	3890626	6.21965e+06
Q8TEQ6_C1415	Q8TEQ6	STANGPDKNEPEVEAEQPLCSSQSQCKEEK	STANGPDKNEPEVEAEQPLC*SSQSQCKEEK	C	0.741107		Missed Filter (0.741107005915275; )	3779808	6317790	10097598
P04920_C1215	P04920	CLDANEAEPVFDER	C*LDANEAEPVFDER	C	0.744501		Missed Filter (0.744501283346785; )	1.00152e+06	1.67794e+06	2.67946e+06
Q9C0C9_C375	Q9C0C9	NCAQGEGSMAK	NC*AQGEGSMAK	C	-0.750738		Missed Filter (-0.750737649932187; )	973729	578687	1.55242e+06
Q9ULT8_C878	Q9ULT8	QCIESENTWR	QC*IESENTWR	C	0.752346		Missed Filter (0.752346342934179; )	2.12347e+06	1.04248e+07	5.70053e+06
A1X283_C598	A1X283	NDMGLECGHK	NDMGLEC*GHK	C	-0.758559		Missed Filter (-0.758558516398878; )	2.11136e+06	1.248e+06	3.35936e+06
Q92620_C20	Q92620	LEGTDLDCQVGGLICK	LEGTDLDC*QVGGLICK	C	0.771013		Missed Filter (0.771013248480745; )	746992	1.27472e+06	2.02171e+06
Q12770_C461	Q12770	LPPEACLPSAKPVGQPTR	LPPEAC*LPSAKPVGQPTR	C	-0.788348		Missed Filter (-0.78834767682741; )	3476623	2.01299e+06	5.48961e+06
Q9UPN4_C218	Q9UPN4	AATCEGSESSGFGK	AATC*EGSESSGFGK	C	0.804388		Missed Filter (0.804387678034015; )	1.04196e+06	1.81969e+06	2.86165e+06
Q9NRZ9_C169	Q9NRZ9	ENEDENSSSTNLCVEDLQK	ENEDENSSSTNLC*VEDLQK	C	0.808386		Missed Filter (0.808385663459241; )	712605	1.24795e+06	1.96056e+06
Q15654_C54	Q15654	VNFCPLPSEQCYQAPGGPEDR	VNFCPLPSEQC*YQAPGGPEDR	C	-0.815419		Missed Filter (-0.815419263309408; )	5488677	3118904	8607581
Q7L2J0_C54	Q7L2J0	CAPSAGSPAAAVGR	C*APSAGSPAAAVGR	C	0.836381		Missed Filter (0.836380957396823; )	1.4776e+06	2.63835e+06	4.11595e+06
Q96G74_C434	Q96G74	KASATCSSATAAASSGLEEWTSR	KASATC*SSATAAASSGLEEWTSR	C	0.836751		Missed Filter (0.836751350090932; )	1.31814e+06	2.35423e+06	3.67237e+06
Q99614_C66	Q99614	LLRDDEAHLQEDQGEEECFHDCSASFEEEPGADKVENK	LLRDDEAHLQEDQGEEECFHDC*SASFEEEPGADKVENK	C	0.843057		Missed Filter (0.843056913394267; )	2.08395e+06	3738292	5.82224e+06
Q12756_C965	Q12756	IVEGQGQGADVGPSADEVNNNTCSAVPPEGLLLDSSEK	IVEGQGQGADVGPSADEVNNNTC*SAVPPEGLLLDSSEK	C	0.858104		Missed Filter (0.85810377365482; )	1293752	2345125	3638877
O95801_C63	O95801	ENPDLACLQSIIFDEERSPEEQAK	ENPDLAC*LQSIIFDEERSPEEQAK	C	0.864888		Missed Filter (0.864887958389074; )	2.72269e+06	2.24982e+06	3.48518e+06
Q7Z5K2_C160	Q7Z5K2	IVEDDASISSCNK	IVEDDASISSC*NK	C	0.881292		Missed Filter (0.881291554020695; )	2.89359e+06	5330068	8.22366e+06
Q9C0C9_C406	Q9C0C9	IMSCSPDTQCSR	IMSCSPDTQC*SR	C	0.887389		Missed Filter (0.887388905295833; )	2.12814e+06	3.93669e+06	6064834
Q13546_C325	Q13546	MQSLQLDCVAVPSSR	MQSLQLDC*VAVPSSR	C	-0.89305		Missed Filter (-0.893049748901838; )	6.39742e+06	3.44485e+06	9842269
Q96SU4_C230	Q96SU4	HADGMISTINPVDAIYQPSPLEPVISTMPSQTVLPPEPVQLCK	HADGMISTINPVDAIYQPSPLEPVISTMPSQTVLPPEPVQLC*K	C	0.896977		Missed Filter (0.896977288899795; )	7.24768e+06	13496334	2.0744e+07
O95197_C34	O95197	AEPSAATQSHSISSSSFGAEPSAPGGGGSPGACPALGTK	AEPSAATQSHSISSSSFGAEPSAPGGGGSPGAC*PALGTK	C	0.908731		Missed Filter (0.90873105724824; )	2.37421e+06	4457324	6.83153e+06
Q8IWL3_C28	Q8IWL3	RRPLSCDAASQAGSNYPR	RRPLSC*DAASQAGSNYPR	C	-0.9118		Missed Filter (-0.911799723779153; )	2118753	1126163	3244916
Q8IWE5_C551	Q8IWE5	EGPVSEPEPGTQEVLCQLK	EGPVSEPEPGTQEVLC*QLK	C	-0.920965		Missed Filter (-0.92096467652765; )	2.86964e+06	1515615	4.38525e+06
O75410_C587	O75410	APVSVSCGGESPLDGICLSESDKTAVLTLIR	APVSVSC*GGESPLDGICLSESDKTAVLTLIR	C	0.922013		Missed Filter (0.922013042790184; )	2.26901e+06	4.29923e+06	6.56824e+06
Q13501_C290	Q13501	SSSQPSSCCSDPSKPGGNVEGATQSLAEQMR	SSSQPSSCC*SDPSKPGGNVEGATQSLAEQMR	C	0.923961		Missed Filter (0.923960599707784; )	1.92638e+06	3.65496e+06	5.58134e+06
Q7Z5K2_C133	Q7Z5K2	ISHVVVEDTVVSDKCFPLEDTLLGK	ISHVVVEDTVVSDKC*FPLEDTLLGK	C	0.934497		Missed Filter (0.934496881257926; )	539875	1.03182e+06	1.5717e+06
Q14980_C961	Q14980	QFCSTQAALQAMER	QFC*STQAALQAMER	C	-0.950764		Missed Filter (-0.950763646556983; )	3.73698e+06	1.93336e+06	5.67034e+06
P49757_C611	P49757	HTEVPTGTCPVDPFEAQWAALENK	HTEVPTGTC*PVDPFEAQWAALENK	C	-0.970701		Missed Filter (-0.970701313272537; )	1.15673e+06	590232	1.74697e+06
Q9BWH6_C185	Q9BWH6	GPSVGEVVPNVGPPEGAVTCETPTPR	GPSVGEVVPNVGPPEGAVTC*ETPTPR	C	0.979779		Missed Filter (0.979779204119297; )	561346	1.10707e+06	1.66841e+06
P25098_C120	P25098	ELLACSHPFSK	ELLAC*SHPFSK	C	-0.995299		Missed Filter (-0.995298611698631; )	1.8587e+06	932381	2.79108e+06
Q9BTT6_C432	Q9BTT6	CGALENLVNDVSDEAWNER	C*GALENLVNDVSDEAWNER	C	1.00346		Missed Filter (1.00346026552214; )	322116	645780	967896
Q9Y520_C177	Q9Y520	ETNDDNYGPGPSLRPPNVACWR	ETNDDNYGPGPSLRPPNVAC*WR	C	-1.04617		Missed Filter (-1.04616811694347; )	1651848	799912	2.45176e+06
Q14789_C1151	Q14789	ETVVISPPCTGSSEHWKPELEEK	ETVVISPPC*TGSSEHWKPELEEK	C	-1.05315		Missed Filter (-1.05315421452138; )	6.56426e+06	3.1634e+06	9727661
Q9NR50_C281	Q9NR50	EANTLNLAPYDACWNACR	EANTLNLAPYDAC*WNACR	C	-1.06174		Missed Filter (-1.06173548610553; )	4.09685e+06	1.96262e+06	6.05946e+06
Q8NG31_C1847	Q8NG31	TPSSCSSSLDSIK	TPSSC*SSSLDSIK	C	1.07613		Missed Filter (1.07613202958606; )	959957	2.02395e+06	2.98391e+06
B1ALY0_C148	B1ALY0	GFSSTDGDAVNYISSQLPDLPILCSR	GFSSTDGDAVNYISSQLPDLPILC*SR	C	1.08104		Missed Filter (1.08104305466609; )	471782	998086	1.46987e+06
O15155_C28	O15155	AGLGEGVPPGNYGNYGYANSGYSACEEENER	AGLGEGVPPGNYGNYGYANSGYSAC*EEENER	C	1.08243		Missed Filter (1.08243107577561; )	1.65946e+07	3.59745e+07	5.07797e+07
Q49MG5_C108	Q49MG5	SNGNITKDEPVCAIK	SNGNITKDEPVC*AIK	C	-1.10991		Missed Filter (-1.10990785362906; )	1.67846e+06	777670	2.45613e+06
Q5VZ89_C955	Q5VZ89	MQTEEVCDASAIVAK	MQTEEVC*DASAIVAK	C	1.17254		Missed Filter (1.17253600922458; )	628845	1.41746e+06	2.04631e+06
Q96BN8_C17	Q96BN8	GTMPQPEAWPGASCAETPAR	GTMPQPEAWPGASC*AETPAR	C	-1.18441		Missed Filter (-1.18440650134615; )	4754196	2.09187e+06	6.84607e+06
Q9Y4F5_C217	Q9Y4F5	APAEPQGCSFR	APAEPQGC*SFR	C	1.20653		Missed Filter (1.20652792363767; )	2.24633e+06	5184118	7.43045e+06
Q9HAD4_C99	Q9HAD4	ITAIITFPSLESCEEK	ITAIITFPSLESC*EEK	C	-1.20965		Missed Filter (-1.20964722728599; )	7987909	3.45377e+06	1.14417e+07
O43303_C513	O43303	LHEPYASSQCIASPNFGTVSGLKPASMLEK	LHEPYASSQC*IASPNFGTVSGLKPASMLEK	C	1.21583		Missed Filter (1.21583245974407; )	565947	1.31455e+06	1.8805e+06
Q9H0L4_C441	Q9H0L4	GMETCAMETR	GMETC*AMETR	C	1.25486		Missed Filter (1.25485607067644; )	1.2071e+06	2.871e+06	4.07811e+06
Q66K74_C598	Q66K74	CGEASPPSAACGSPASQLVATPSLELGPIPAGEEK	CGEASPPSAAC*GSPASQLVATPSLELGPIPAGEEK	C	1.29598		Missed Filter (1.29597907452654; )	598529	1.46965e+06	2.06818e+06
Q6WKZ4_C318	Q6WKZ4	SNVCINGNHVYLEQPEAK	SNVC*INGNHVYLEQPEAK	C	1.30223		Missed Filter (1.30223365995091; )	3.21246e+06	7922256	1.11347e+07
Q9Y4W2_C706	Q9Y4W2	TDTLGLSCGVGSGNCSNSSSSNFEGLLWSQGQLHGLK	TDTLGLSCGVGSGNC*SNSSSSNFEGLLWSQGQLHGLK	C	1.31385		Missed Filter (1.31385275850802; )	893798	2.22202e+06	3.11582e+06
P13639_C591	P13639	ETVSEESNVLCLSK	ETVSEESNVLC*LSK	C	1.32442		Missed Filter (1.32441515802543; )	3.67345e+06	7721129	10804261
Q9UHR4_C442	Q9UHR4	SISTVNLSENSSVVIPPPDYLECLSMGAAADR	SISTVNLSENSSVVIPPPDYLEC*LSMGAAADR	C	1.34597		Missed Filter (1.34596906830264; )	706119	2.28392e+06	2.50108e+06
P78312_C106	P78312	LGTTTHDTCSEDTYSTLLQR	LGTTTHDTC*SEDTYSTLLQR	C	-1.37096		Missed Filter (-1.37096239262687; )	5633153	2.17796e+06	7.81112e+06
Q8N609_C333	Q8N609	WVEDSNIQASCMK	WVEDSNIQASC*MK	C	-1.38616		Missed Filter (-1.38616220998017; )	1.32739e+06	507833	1835220
P51957_C326	P51957	CLSQEKPR	C*LSQEKPR	C	-1.43091		Missed Filter (-1.430910790581; )	24425132	9059200	33484332
O60551_C104	O60551	AMELLSACQGPAR	AMELLSAC*QGPAR	C	-1.48422		Missed Filter (-1.48422461913964; )	1.70022e+06	607729	2.30795e+06
Q8IZQ1_C1945	Q8IZQ1	SQSEYCNVGTK	SQSEYC*NVGTK	C	1.49133		Missed Filter (1.49133017431284; )	508350	1.42922e+06	1.93757e+06
O95999_C119	O95999	CSSCEPFPDGATNNLSR	C*SSCEPFPDGATNNLSR	C	1.58306		Missed Filter (1.58305647701325; )	1.49874e+06	4490281	5.98902e+06
Q9UKA4_C1290	Q9UKA4	NSCYADGDEDYKVEEK	NSC*YADGDEDYKVEEK	C	1.74209		Missed Filter (1.74209002696611; )	1184389	3.96201e+06	5.1464e+06
Q2VPK5_C434	Q2VPK5	TPPGPCCSPGVGWAQR	TPPGPCC*SPGVGWAQR	C	1.76683		Missed Filter (1.76683317720323; )	1.10079e+06	3746045	4.84683e+06
Q9P0L0_C128	Q9P0L0	CVFEMPNENDKLNDMEPSK	C*VFEMPNENDKLNDMEPSK	C	1.7679		Missed Filter (1.76789781425622; )	969502	3.30171e+06	4.27121e+06
Q9H2U1_C135	Q9H2U1	NTPCSENKLDIQEK	NTPC*SENKLDIQEK	C	1.79191		Missed Filter (1.79191245430099; )	1.71786e+06	5948508	7.66637e+06
Q92503_C644	Q92503	FHSMPACAASSLPR	FHSMPAC*AASSLPR	C	1.99091		Missed Filter (1.99090974182775; )	1.58035e+06	6281677	7.86202e+06
O43164_C224	O43164	EAEAYTGLSPPVPSFNCEVRDEFEELDSVPLVK	EAEAYTGLSPPVPSFNC*EVRDEFEELDSVPLVK	C	2.23205		Missed Filter (2.23205153149203; )	183886	863898	1.04778e+06
P53992_C78	P53992	APPSSGAPPASTAQAPCGQAAYGQFGQGDVQNGPSSTVQMQR	APPSSGAPPASTAQAPC*GQAAYGQFGQGDVQNGPSSTVQMQR	C	2.64473		Missed Filter (2.64473449230056; )	753984	4715267	5.46925e+06
O95405_C358	O95405	CSDCLVPNEVR	C*SDCLVPNEVR	C	-2.83004		Missed Filter (-2.8300396852189; )	6204200	872487	7076687
Q16799_C104	Q16799	DGEGSCYTSLISDICYPPQEDSTYFTGILQK	DGEGSC*YTSLISDICYPPQEDSTYFTGILQK	C	2.95311		Missed Filter (2.95311101351787; )	765230	5926069	6.6913e+06
Q8IVT5_C62	Q8IVT5	CAVSNDLTQQEIR	C*AVSNDLTQQEIR	C	3.32637		Missed Filter (3.32636502165539; )	2762291	2.91037e+07	30470285
Q02750_C277	Q02750	ELELMFGCQVEGDAAETPPRPR	ELELMFGC*QVEGDAAETPPRPR	C	3.61602e-05		Missed Filter (3.61601809315077E-05; )	7.46947e+06	7.46972e+06	1.49392e+07
P31943_C267	P31943	DLNYCFSGMSDHR	DLNYC*FSGMSDHR	C	-6.3893e-05		Missed Filter (-6.38929695960227E-05; )	6.26288e+06	6262606	1.25255e+07
Q9Y3F4_C340	Q9Y3F4	IGFPETTEEELEEIASENSDCIFPSAPDVK	IGFPETTEEELEEIASENSDC*IFPSAPDVK	C	Missed Standard Deviation Filter (Unfiltered ratio: -0.706205462979833; Max Ratio: 0.343536130899206)		Missed Filter (Missed Standard Deviation Filter (Unfiltered ratio: -0.706205462979833; Max Ratio: 0.343536130899206); )	1.53827e+06	1.09329e+06	2.63156e+06
P13861_C101	P13861	VSVCAETYNPDEEEEDTDPR	VSVC*AETYNPDEEEEDTDPR	C	Missed Standard Deviation Filter (Unfiltered ratio: 1.10552796117709; Max Ratio: 2.84062696406778)		Missed Filter (Missed Standard Deviation Filter (Unfiltered ratio: 1.10552796117709; Max Ratio: 2.84062696406778); )	5.5065e+06	1.03751e+07	1.58816e+07
O15270_C10	O15270	MRPEPGGCCCR	MRPEPGGCCC*R	C		0.00440068	Missed Filter (; 0.00440068082286106)	28054466	28140172	56194638
Q8NFP7_C3	Q8NFP7	CKPNQTR	C*KPNQTR	C		-0.00663584	Missed Filter (; -0.00663583769506831)	33944404	3.3793e+07	6.77374e+07
P13807_C699	P13807	RASCTSSTSGSK	RASC*TSSTSGSK	C		0.0115259	Missed Filter (; 0.0115258610598078)	17396366	17535904	34932270
O15118_C1261	O15118	SCATEER	SC*ATEER	C		0.0184238	Missed Filter (; 0.0184238231738885)	10436865	10571003	21007868
Q9UKY4_C21	Q9UKY4	CGPQAAR	C*GPQAAR	C		0.0192451	Missed Filter (; 0.0192451225171075)	80304504	81382592	161687096
O75460_C538	O75460	ASNHSLCSGSSASK	ASNHSLC*SGSSASK	C		0.0207331	Missed Filter (; 0.0207331261654366)	23564708	23905804	47470512
P54646_C490	P54646	SCSAAGLHRPR	SC*SAAGLHRPR	C		0.0226599	Missed Filter (; 0.0226598893785265)	16013774	16267282	32281056
Q5H9R7_C844	Q5H9R7	CAAPRPPSSSPEQR	C*AAPRPPSSSPEQR	C		0.0239898	Missed Filter (; 0.0239898244243908)	43591996	44322924	87914920
Q9BTX1_C9	Q9BTX1	ATAVSRPCAGR	ATAVSRPC*AGR	C		0.0257675	Missed Filter (; 0.0257674732452015)	6.37284e+06	6487687	1.28605e+07
P41227_C194	P41227	GNSPPSSGEACREEK	GNSPPSSGEAC*REEK	C		-0.0311648	Missed Filter (; -0.0311648397787198)	24304896	23785496	48090392
P78381_C359	P78381	AIASASASASGPCVHQQPPGQPPPPQLSSHR	AIASASASASGPC*VHQQPPGQPPPPQLSSHR	C		-0.0492789	Missed Filter (; -0.049278947880944)	5.67509e+06	5.48452e+06	11159615
P22059_C343	P22059	GATVLPANTPGNVGSGKDQCCSGK	GATVLPANTPGNVGSGKDQC*CSGK	C		-0.0532413	Missed Filter (; -0.0532412945534798)	3978509	3834362	7812871
Q9BQ61_C165	Q9BQ61	AHQCGDDDK	AHQC*GDDDK	C		0.0541434	Missed Filter (; 0.0541434419357128)	8.43298e+06	8.75521e+06	1.71882e+07
Q9BZE9_C224	Q9BZE9	GDLSRPEDADTSGPCCEHTQEK	GDLSRPEDADTSGPC*CEHTQEK	C		0.0642574	Missed Filter (; 0.0642574344776127)	3310448	3461228	6771676
A8CG34_C438	A8CG34	IREEELCHHSSSSTPLAADKESQGEK	IREEELC*HHSSSSTPLAADKESQGEK	C		0.0648381	Missed Filter (; 0.0648381340872548)	32036523	23802758	46559446
Q9UI10_C69	Q9UI10	GAEPETGSAVSAAQCQVGPTR	GAEPETGSAVSAAQC*QVGPTR	C		0.0652809	Missed Filter (; 0.065280861211187)	15235144	15940358	31175502
P18031_C324	P18031	CREFFPNHQWVK	C*REFFPNHQWVK	C		0.0731908	Missed Filter (; 0.0731908405063013)	12218811	12854690	25073501
Q8N2G8_C82	Q8N2G8	WCLQGAQRPHCSLR	WCLQGAQRPHC*SLR	C		0.0843587	Missed Filter (; 0.0843586867012044)	29131780	30882252	60014032
Q5UIP0_C1865	Q5UIP0	TVGPCLGDSK	TVGPC*LGDSK	C		-0.0845556	Missed Filter (; -0.0845555842055161)	4551419	4.29233e+06	8.84375e+06
Q6ICH7_C116	Q6ICH7	CTHNEGLNQK	C*THNEGLNQK	C		0.104091	Missed Filter (; 0.104091447711022)	7.10889e+06	7.64076e+06	14749655
Q8TD19_C25	Q8TD19	HCDSINSDFGSESGGCGDSSPGPSASQGPR	HCDSINSDFGSESGGC*GDSSPGPSASQGPR	C		0.104123	Missed Filter (; 0.104123129552184)	6851263	7364018	14215281
Q96AY4_C2077	Q96AY4	NTCFSPDHKQPQPGTAGGMR	NTC*FSPDHKQPQPGTAGGMR	C		0.107856	Missed Filter (; 0.107855752920133)	4226017	4554063	8780080
Q9BXB5_C511	Q9BXB5	SPASCHEHPMADDPSK	SPASC*HEHPMADDPSK	C		-0.111	Missed Filter (; -0.111000410876983)	2.48912e+06	2.30479e+06	4793913
Q86XL3_C702	Q86XL3	NGLCHPLNHSR	NGLC*HPLNHSR	C		0.124276	Missed Filter (; 0.124276110101205)	10136762	20480613	21185434
O60716_C618	O60716	YQEAAPNVANNTGPHAASCFGAK	YQEAAPNVANNTGPHAASC*FGAK	C		-0.131517	Missed Filter (; -0.131517163909516)	16736901	15279384	32016285
Q6NTF9_C259	Q6NTF9	KLNPVPGSYPTQSCHPHLSPSHPVSQTQHASGQK	KLNPVPGSYPTQSC*HPHLSPSHPVSQTQHASGQK	C		0.131733	Missed Filter (; 0.13173279912044)	7163775	7848695	15012470
Q8TCJ2_C40	Q8TCJ2	HGHHGPGAQCAHK	HGHHGPGAQC*AHK	C		0.135784	Missed Filter (; 0.135783772614386)	4106025	4.51062e+06	8.61664e+06
Q96T51_C8	Q96T51	EGGCAAGR	EGGC*AAGR	C		-0.139006	Missed Filter (; -0.139005980941024)	6.50529e+06	5.90775e+06	12413041
Q96S59_C527	Q96S59	AHQSYCHSNK	AHQSYC*HSNK	C		-0.151496	Missed Filter (; -0.151496063042723)	3095684	2787095	5882779
P50402_C147	P50402	QSVTSFPDADAFHHQVHDDDLLSSSEEECKDR	QSVTSFPDADAFHHQVHDDDLLSSSEEEC*KDR	C		0.166184	Missed Filter (; 0.166183621030311)	4.38949e+06	4925385	9.31487e+06
Q92615_C679	Q92615	EQKPNTVGCGKEEK	EQKPNTVGC*GKEEK	C		0.175975	Missed Filter (; 0.175975461214098)	8643279	9.75768e+06	1.8401e+07
Q9HBM0_C412	Q9HBM0	YFETQHQSVPQCLSK	YFETQHQSVPQC*LSK	C		0.177946	Missed Filter (; 0.177945643614639)	12503089	14144392	26647481
Q9UKA4_C1232	Q9UKA4	VKNPCLNVQSQR	VKNPC*LNVQSQR	C		0.202264	Missed Filter (; 0.202264495860521)	1.43003e+06	1.64525e+06	3.07528e+06
Q9UBP0_C220	Q9UBP0	SQTDVYNDSTNLACR	SQTDVYNDSTNLAC*R	C		0.2097	Missed Filter (; 0.209700255810915)	3.6563e+06	4228316	7.88461e+06
Q8IV63_C418	Q8IV63	FVDKPGPFVGPCGHWIRPSETLQK	FVDKPGPFVGPC*GHWIRPSETLQK	C		0.218823	Missed Filter (; 0.218822907055599)	8912326	10372019	19284345
Q9Y520_C895	Q9Y520	SVEDVRPHHTDANNQSACFEAPDQK	SVEDVRPHHTDANNQSAC*FEAPDQK	C		-0.228068	Missed Filter (; -0.228067602674535)	4414287	3.76882e+06	8.18311e+06
P48651_C419	P48651	TYSECEDGTYSPEISWHHR	TYSEC*EDGTYSPEISWHHR	C		0.24014	Missed Filter (; 0.240139564024954)	25781584	30443928	56225512
P10636_C639	P10636	CGSLGNIHHKPGGGQVEVK	C*GSLGNIHHKPGGGQVEVK	C		0.257626	Missed Filter (; 0.257626233664442)	12465092	14902142	27367234
Q96NL8_C33	Q96NL8	GCGGGTHSSDR	GC*GGGTHSSDR	C		0.269397	Missed Filter (; 0.26939695592489)	4.06934e+06	4.90479e+06	8.97412e+06
O75140_C1053	O75140	CLGEQQAAVHGGK	C*LGEQQAAVHGGK	C		-0.287717	Missed Filter (; -0.287717244617659)	3.93795e+06	3225954	7.1639e+06
Q15831_C418	Q15831	KACSASSK	KAC*SASSK	C		-0.300965	Missed Filter (; -0.300965190808037)	3.02634e+06	2.45651e+06	5.48285e+06
P30825_C628	P30825	TPDGNLDQCK	TPDGNLDQC*K	C		-0.333447	Missed Filter (; -0.333447331657709)	3.93901e+06	3.12615e+06	7.06516e+06
P27816_C67	P27816	KKPCSETSQIEDTPSSKPTLLANGGHGVEGSDTTGSPTEFLEEK	KKPC*SETSQIEDTPSSKPTLLANGGHGVEGSDTTGSPTEFLEEK	C		0.338746	Missed Filter (; 0.338745902014644)	646758	817927	1.46468e+06
Q06830_C173	Q06830	HGEVCPAGWKPGSDTIKPDVQK	HGEVC*PAGWKPGSDTIKPDVQK	C		-0.3799	Missed Filter (; -0.379900458097547)	2.92434e+06	2.24733e+06	5171671
Q13370_C576	Q13370	NSDSNLCNSCGHQMLK	NSDSNLC*NSCGHQMLK	C		-0.395934	Missed Filter (; -0.395934012329043)	3.67311e+06	2.79155e+06	6.46467e+06
O15027_C2337	O15027	EVSQHFNQAPGDLPAAGGPPSGAMPFYNPAQLAQACATSGSSR	EVSQHFNQAPGDLPAAGGPPSGAMPFYNPAQLAQAC*ATSGSSR	C		0.412924	Missed Filter (; 0.412923574399858)	7082273	9429204	16511477
Q6NUM9_C534	Q6NUM9	GACYGADHDLGR	GAC*YGADHDLGR	C		0.4229	Missed Filter (; 0.422900021070783)	4.65969e+06	6246874	1.09066e+07
O95757_C540	O95757	CHAEHTPEEEIDHTGAK	C*HAEHTPEEEIDHTGAK	C		0.425795	Missed Filter (; 0.425794581517934)	2696386	3622088	6318474
P02545_C588	P02545	TVLCGTCGQPADK	TVLC*GTCGQPADK	C		0.428124	Missed Filter (; 0.428123848688036)	11102606	14938364	26040970
Q14738_C17	Q14738	CTAKPSSSGK	C*TAKPSSSGK	C		-0.463566	Missed Filter (; -0.463566049763039)	34674314	25161375	59835689
Q9NZB2_C1103	Q9NZB2	TCNTNPHLNALSTDSACR	TCNTNPHLNALSTDSAC*R	C		-0.467742	Missed Filter (; -0.467741943474942)	8609133	6225225	14834358
Q14728_C9	Q14728	GWGGGGGCTPRPPIHQQPPER	GWGGGGGC*TPRPPIHQQPPER	C		0.484201	Missed Filter (; 0.484200905501513)	5.22816e+06	7313212	1.25414e+07
Q9P0L0_C179	Q9P0L0	KLMEECKR	KLMEEC*KR	C		0.530334	Missed Filter (; 0.530333819297621)	2680985	3.87205e+06	6.55303e+06
Q14574_C814	Q14574	GGHTEVDNCR	GGHTEVDNC*R	C		0.601786	Missed Filter (; 0.601785634174773)	4295641	6519038	10814679
Q14679_C1174	Q14679	CSGQTSR	C*SGQTSR	C		-0.946454	Missed Filter (; -0.946453890611013)	3640156	1.8889e+06	5.52906e+06
Q9GZT9_C127	Q9GZT9	AKPPADPAAAASPCR	AKPPADPAAAASPC*R	C		-1.04228	Missed Filter (; -1.04227984473004)	24444968	11869488	36314456
Q71DI3_C111	Q71DI3	FQSSAVMALQEASEAYLVGLFEDTNLCAIHAKRVTIMPK	FQSSAVMALQEASEAYLVGLFEDTNLC*AIHAKRVTIMPK	C		-3.65355	Missed Filter (; -3.65355200533204)	174922678	6.46755e+06	8.78571e+07
Q14C86_C789	Q14C86	SECSSDFGGK	SEC*SSDFGGK	C	-0.541347	-0.853974	-0.697661	17576618	1.16893e+07	2.9266e+07
Q8NF91_C8703	Q8NF91	CSLSQPGPSVSSPHSR	C*SLSQPGPSVSSPHSR	C	-0.808065	-0.221236	-0.51465	5.15564e+07	3.86399e+07	90196265
O15027_C2293	O15027	CSSMSSLSR	C*SSMSSLSR	C	-0.00709321	-0.864132	-0.435613	1.35637e+07	1.18511e+07	2.54149e+07
Q16637_C60	Q16637	NGDICETSGKPK	NGDIC*ETSGKPK	C	-0.212792	-0.57479	-0.393791	11414440	9051161	20465601
Q9ULH7_C636	Q9ULH7	HGSLGSSIKDEASLPDCSSSR	HGSLGSSIKDEASLPDC*SSSR	C	0.0243829	-0.762504	-0.36906	2.08832e+07	1.8095e+07	3.89782e+07
Q9HB90_C377	Q9HB90	SCGHQTSASSLK	SC*GHQTSASSLK	C	-0.166036	-0.553107	-0.359571	9.21432e+06	7.02801e+06	1.62423e+07
P19784_C336	P19784	EQSQPCADNAVLSSGLTAAR	EQSQPC*ADNAVLSSGLTAAR	C	0.11551	-0.778113	-0.331302	18005617	1.66321e+07	3.46377e+07
Q9Y6K0_C11	Q9Y6K0	CGDSHPESPVGFGHMSTTGCVLNK	C*GDSHPESPVGFGHMSTTGCVLNK	C	-0.647571	0.035678	-0.305947	3.21011e+08	3.28047e+08	6.49058e+08
Q15645_C14	Q15645	QALPCVAESPTVHVEVHQR	QALPC*VAESPTVHVEVHQR	C	-0.0422974	-0.538835	-0.290566	7.06089e+06	5868898	1.29298e+07
O94851_C703	O94851	SLGSNQECGSSK	SLGSNQEC*GSSK	C	-0.0322239	-0.52896	-0.280592	1.53592e+07	14567350	2.99266e+07
Q9P0U3_C60	Q9P0U3	SFTCSTR	SFTC*STR	C	0.0228227	-0.555278	-0.266228	37786773	36971727	74758500
Q9H814_C51	Q9H814	AFQNTATACAPVSHYR	AFQNTATAC*APVSHYR	C	-0.177806	-0.313335	-0.245571	2.56056e+07	22014033	4.76197e+07
P49790_C21	P49790	CHQGPIKPYQQGR	C*HQGPIKPYQQGR	C	-0.285765	-0.148066	-0.216915	364683507	324078510	688762017
Q92521_C8	Q92521	CGMEPGGGDASLTLHGLQNR	C*GMEPGGGDASLTLHGLQNR	C	0.0229453	-0.444603	-0.210829	1.44839e+07	1.25575e+07	27041364
O95861_C42	O95861	TCATDLQTK	TC*ATDLQTK	C	-0.191788	-0.210195	-0.200991	84053390	73440658	157494048
P35658_C1003	P35658	TSCKDDEAVVQAPR	TSC*KDDEAVVQAPR	C	-0.248367	-0.149632	-0.198999	11506832	9967623	21474455
Q9H910_C118	Q9H910	DHVFLCEGEEPK	DHVFLC*EGEEPK	C	-0.383987	0.0304624	-0.176762	1.03982e+08	8.3301e+07	1.87283e+08
A6NDG6_C297	A6NDG6	NNQESDCVSK	NNQESDC*VSK	C	-0.0255167	-0.321978	-0.173747	2.88251e+07	2.6177e+07	5.50021e+07
Q96E22_C77	Q96E22	GGSCLAAAHHR	GGSC*LAAAHHR	C	-0.237336	-0.0822748	-0.159805	3.22603e+07	29966701	6.2227e+07
Q9HC52_C261	Q9HC52	RQDSDLVQCGVTSPSSAEATGK	RQDSDLVQC*GVTSPSSAEATGK	C	0.0771987	-0.348024	-0.135413	26822769	26150682	52973451
P22413_C6	P22413	DGCAGGGSR	DGC*AGGGSR	C	0.117946	-0.388051	-0.135053	29134284	29148960	58283244
P0DN79_C15	P0DN79	PSETPQAEVGPTGCPHR	PSETPQAEVGPTGC*PHR	C	-0.279349	0.0299194	-0.124715	50629010	44560338	95189348
Q9BXS9_C628	Q9BXS9	SNNVEDCK	SNNVEDC*K	C	-0.0673044	-0.179127	-0.123215	1.99318e+07	1.85681e+07	3.84998e+07
P35611_C525	P35611	TAGPQSQVLCGVVMDR	TAGPQSQVLC*GVVMDR	C	0.0157962	-0.248915	-0.11656	3.82018e+07	36792444	7.49943e+07
O95210_C168	O95210	AATCFAEK	AATC*FAEK	C	0.0211816	-0.25098	-0.114899	1.10009e+08	1.10692e+08	220700823
Q15464_C224	Q15464	CAASAAEESGAGKK	C*AASAAEESGAGKK	C	0.0777433	-0.30155	-0.111903	8.06942e+06	7.51366e+06	1.55831e+07
Q99439_C175	Q99439	CASQSGMTAYGTR	C*ASQSGMTAYGTR	C	-0.323623	0.100303	-0.11166	2.10947e+07	18640251	3.9735e+07
O14967_C511	O14967	TDICIPQTK	TDIC*IPQTK	C	-0.0796108	-0.14054	-0.110076	406780516	376661357	778801850
Q96T21_C291	Q96T21	NNPNESVTANAATNSPSCTR	NNPNESVTANAATNSPSC*TR	C	0.021649	-0.231042	-0.104697	7.56863e+06	7404509	1.49731e+07
P27816_C635	P27816	CSLPAEEDSVLEK	C*SLPAEEDSVLEK	C	-0.00183273	-0.181003	-0.0914179	76063157	75298854	151362011
P49069_C123	P49069	LDSFIKPPECSSDVNLELR	LDSFIKPPEC*SSDVNLELR	C	-0.23756	0.0625751	-0.0874924	140135034	141797849	281932883
P49790_C1065	P49790	SASVAPFTCK	SASVAPFTC*K	C	0.00015791	-0.161482	-0.0806622	72953782	71321913	144275695
Q5JTW2_C653	Q5JTW2	MCSPSPDATSGTGSQR	MC*SPSPDATSGTGSQR	C	0.0756587	-0.232222	-0.0782816	2.02407e+07	1.98157e+07	4.00564e+07
O60664_C60	O60664	TVCDAAEK	TVC*DAAEK	C	-0.00840852	-0.141661	-0.0750346	2.74369e+07	2.65459e+07	5.39828e+07
Q6FI81_C237	Q6FI81	AASCGEGK	AASC*GEGK	C	-0.0524789	-0.0939838	-0.0732314	90899418	86478058	177377476
Q969V6_C326	Q969V6	SLSTTNSSSSSGAPGPCGLAR	SLSTTNSSSSSGAPGPC*GLAR	C	0.0484433	-0.181589	-0.066573	11652875	11420080	23072955
Q14318_C378	Q14318	LPAKCPGK	LPAKC*PGK	C	0.0703228	-0.201858	-0.0657678	338562242	319237542	657799784
Q9HCU5_C128	Q9HCU5	CGAETQHEGLELR	C*GAETQHEGLELR	C	0.0643885	-0.193044	-0.0643277	7.89522e+08	7.6505e+08	1.55457e+09
Q9UHQ4_C171	Q9UHQ4	SHGKDEECVLEAENKK	SHGKDEEC*VLEAENKK	C	-0.0732881	-0.0484099	-0.060849	1.0719e+07	10334514	2.10535e+07
P33981_C229	P33981	NNSCDSR	NNSC*DSR	C	0.0708003	-0.182057	-0.0556281	1.17938e+07	11580025	2.33738e+07
Q9UNY4_C224	Q9UNY4	SQQCQGNELTRPSASSQEK	SQQC*QGNELTRPSASSQEK	C	0.0824654	-0.180308	-0.0489212	2.63734e+07	2.61096e+07	5.24831e+07
Q5SW79_C212	Q5SW79	NHEAGTSGCGIDAK	NHEAGTSGC*GIDAK	C	0.0037442	-0.0966055	-0.0464306	7.63353e+07	7.52948e+07	1.5163e+08
Q99700_C892	Q99700	GPEVTSQGVQTSSPACK	GPEVTSQGVQTSSPAC*K	C	0.052428	-0.142062	-0.0448169	3.66543e+07	36131419	7.27857e+07
Q96S66_C550	Q96S66	GQDPVSSPCG	GQDPVSSPC*G	C	0.0111588	-0.0954615	-0.0421513	384672080	381776788	766448868
Q9NUM4_C61	Q9NUM4	DSVTCPTCQGTGR	DSVTC*PTCQGTGR	C	0.149865	-0.230844	-0.0404893	1.52525e+07	1.94438e+07	3.19374e+07
P56962_C290	P56962	LTSSCPDLPSQTDK	LTSSC*PDLPSQTDK	C	-0.0201592	-0.0596021	-0.0398807	93344918	9.1542e+07	1.84887e+08
Q92545_C1188	Q92545	IVGISSEGNLNTLSCDPGHSR	IVGISSEGNLNTLSC*DPGHSR	C	0.072396	-0.140626	-0.0341148	3.50512e+07	3.44373e+07	69488530
Q96HA1_C461	Q96HA1	IREEELCHHSSSSTPLAADR	IREEELC*HHSSSSTPLAADR	C	-0.194342	0.129072	-0.0326349	9.52251e+06	9.85718e+06	1.93797e+07
Q96I15_C22	Q96I15	DAPAPAASQPSGCGK	DAPAPAASQPSGC*GK	C	0.100577	-0.16574	-0.0325814	1.66837e+07	16894830	3.35786e+07
Q9NYZ3_C198	Q9NYZ3	ESCTAHAASQAATQR	ESC*TAHAASQAATQR	C	0.127353	-0.192042	-0.0323445	1.05993e+07	10288530	2.08878e+07
O75410_C482	O75410	HETQSLALDACSR	HETQSLALDAC*SR	C	0.0114995	-0.0731571	-0.0308288	2.42978e+07	2.36565e+07	4.79543e+07
Q92538_C613	Q92538	ETARPSCEIVDGTR	ETARPSC*EIVDGTR	C	0.0769049	-0.133565	-0.0283301	2.3102e+07	2.32472e+07	46349200
Q9P2E9_C892	Q9P2E9	ELCHTQSSHASLR	ELC*HTQSSHASLR	C	-0.0282996	-0.0270451	-0.0276723	45883167	45022318	90905485
Q8N511_C124	Q8N511	NVTCQDTR	NVTC*QDTR	C	0.060666	-0.111315	-0.0253246	2.65603e+08	2.71219e+08	5.36822e+08
Q9UHD1_C86	Q9UHD1	ELCELKPK	ELC*ELKPK	C	-0.018846	-0.0306102	-0.0247281	52752408	51933405	104685813
P46821_C2041	P46821	TPDTSTYCYETAEK	TPDTSTYC*YETAEK	C	-0.0838488	0.038445	-0.0227019	2.92171e+07	2.82358e+07	5.74529e+07
Q5SQN1_C369	Q5SQN1	SCSVWHAASGLMGR	SC*SVWHAASGLMGR	C	0.0885188	-0.128731	-0.0201062	30700702	31300433	62001135
Q96EV8_C302	Q96EV8	AKPPSSSSTCTDSATR	AKPPSSSSTC*TDSATR	C	0.252992	-0.292053	-0.0195304	9.06513e+06	9.37484e+06	1.844e+07
P60468_C39	P60468	NASCGTR	NASC*GTR	C	0.016859	-0.0556467	-0.0193938	8446018724	8.36912e+09	1.68151e+10
Q9NUQ3_C480	Q9NUQ3	DLATPVMQPCTALDSHK	DLATPVMQPC*TALDSHK	C	0.0592678	-0.095798	-0.0182651	12823710	1.24262e+07	2.52499e+07
P49790_C404	P49790	CSTGYEK	C*STGYEK	C	-0.0470169	0.0139238	-0.0165465	9.64539e+07	9.70885e+07	1.93542e+08
P08240_C253	P08240	VWELGGCANK	VWELGGC*ANK	C	0.0459626	-0.0783528	-0.0161951	679090160	692829996	1371920156
Q9Y4P3_C44	Q9Y4P3	SGRPACQK	SGRPAC*QK	C	0.0237745	-0.0451829	-0.0107042	229139944	227039160	456179104
Q9P246_C698	Q9P246	HTSCSSAGNDSKPVQEAPSVAR	HTSC*SSAGNDSKPVQEAPSVAR	C	0.0387207	-0.059357	-0.0103181	87914806	87069378	174984184
P49321_C708	P49321	KPTDGASSSNCVTDISHLVR	KPTDGASSSNC*VTDISHLVR	C	0.0508214	-0.0648613	-0.00701995	68868693	69799032	138667725
Q86W56_C155	Q86W56	STQYLNQHQTAAMCK	STQYLNQHQTAAMC*K	C	-0.135113	0.12177	-0.00667135	9.98206e+06	9.71123e+06	1.96933e+07
P46821_C1814	P46821	TATCHSSSSPPIDAASAEPYGFR	TATC*HSSSSPPIDAASAEPYGFR	C	-0.0290723	0.0160608	-0.00650573	5.69717e+07	52325399	105281730
P14923_C49	P14923	GIMEEDEACGR	GIMEEDEAC*GR	C	-0.0379731	0.025129	-0.00642206	2.20514e+07	2.16567e+07	4.3708e+07
Q8WYP5_C1628	Q8WYP5	LVCSGENDNHGQIANLPSAVTSDQK	LVC*SGENDNHGQIANLPSAVTSDQK	C	0.0793597	-0.0908126	-0.00572646	65316438	67244338	132560776
Q96BY9_C320	Q96BY9	AYSPLHGGSGSYSVCSNSDTK	AYSPLHGGSGSYSVC*SNSDTK	C	-0.0833066	0.0719281	-0.00568923	51243706	49564780	100808486
O75369_C2501	O75369	SSTETCYSAIPK	SSTETC*YSAIPK	C	0.0264086	-0.0361877	-0.00488954	3.6504e+07	36714137	7.32182e+07
Q8N2K0_C15	Q8N2K0	CAAAGSSSSGSAAAALDADCR	C*AAAGSSSSGSAAAALDADCR	C	0.00601134	-0.00968765	-0.00183815	1.13446e+08	1.14858e+08	2.27186e+08
Q9H2G2_C1212	Q9H2G2	MTGESECLNPSTQSR	MTGESEC*LNPSTQSR	C	0.122201	-0.125792	-0.0017953	3.11671e+07	3.23289e+07	6.3496e+07
Q9Y2G8_C744	Q9Y2G8	GKPSCGLGSRPIK	GKPSC*GLGSRPIK	C	0.0415146	-0.0419876	-0.00023653	188164536	186252222	374416758
P46063_C606	P46063	AESSQTCHSEQGDK	AESSQTC*HSEQGDK	C	0.0104791	-0.0106799	-0.000100373	1.47743e+07	14713505	2.94878e+07
Q14694_C94	Q14694	TPSYSISSTLNPQAPEFILGCTASK	TPSYSISSTLNPQAPEFILGC*TASK	C	0.0170799	-0.0161681	0.000455913	90972464	91827162	182799626
P18031_C344	P18031	EETQEDKDCPIKEEK	EETQEDKDC*PIKEEK	C	0.186014	-0.182574	0.00172003	100388290	109315440	209703730
Q8NC51_C11	Q8NC51	PGHLQEGFGCVVTNR	PGHLQEGFGC*VVTNR	C	-0.0560091	0.0623816	0.00318628	641945411	6.25418e+08	1.26736e+09
O15270_C19	O15270	ANGCVANGEVR	ANGC*VANGEVR	C	0.0406218	-0.0297943	0.00541374	238120298	241567472	479687770
P49841_C14	P49841	TTSFAESCKPVQQPSAFGSMK	TTSFAESC*KPVQQPSAFGSMK	C	0.0517881	-0.0400314	0.00587836	1.49329e+07	1.51241e+07	30056992
Q7Z2W4_C272	Q7Z2W4	SCTPSPDQISHR	SC*TPSPDQISHR	C	-0.00743307	0.0280801	0.0103235	9.44223e+07	9.48829e+07	1.89305e+08
Q9BX95_C76	Q9BX95	NQCPAKPDGGGAPNGVR	NQC*PAKPDGGGAPNGVR	C	0.0241172	8.37531e-05	0.0121005	37791644	38097276	75888920
Q02952_C1479	Q02952	SSEKNEDFAAHPGEDAVPTGPDCQAK	SSEKNEDFAAHPGEDAVPTGPDC*QAK	C	-0.0709478	0.0957358	0.012394	8.18918e+06	8.50047e+06	1.66897e+07
Q9HBM0_C41	Q9HBM0	CTTEGQQKPPTR	C*TTEGQQKPPTR	C	0.0469345	-0.0218881	0.0125232	8.78226e+07	8.81876e+07	176010234
O75410_C174	O75410	AAHGCVTAVSGK	AAHGC*VTAVSGK	C	-0.00342329	0.0318324	0.0142046	9.2164e+07	9.27743e+07	1.84938e+08
Q8N5G2_C315	Q8N5G2	EDSCTASSK	EDSC*TASSK	C	-0.0962115	0.129871	0.0168297	44012411	4.64689e+07	8.74035e+07
O60831_C28	O60831	LAAPDPCDPQR	LAAPDPC*DPQR	C	0.0315774	0.00332276	0.0174501	1.1045e+08	1.12288e+08	222737384
P49790_C68	P49790	NEDVCSCSTDTSEVPR	NEDVCSC*STDTSEVPR	C	0.0867442	-0.0501303	0.0183069	1.51343e+08	1.54638e+08	3.05982e+08
P07814_C744	P07814	ERPTPSLNNNCTTSEDSLVLYNR	ERPTPSLNNNC*TTSEDSLVLYNR	C	0.0936088	-0.0509274	0.0213407	121097924	125772480	246870404
Q9C0E8_C149	Q9C0E8	ECEPPSAGAAVTARPGQEIR	EC*EPPSAGAAVTARPGQEIR	C	0.0766812	-0.0328421	0.0219196	208946988	213321114	422268102
P22681_C508	P22681	VCVPSSASALGTASK	VC*VPSSASALGTASK	C	0.0984296	-0.0545548	0.0219374	2.57187e+07	27382040	5.31008e+07
Q9H6T3_C519	Q9H6T3	QDVCQSYSEK	QDVC*QSYSEK	C	-0.0314418	0.0798969	0.0242275	6.21815e+07	61761694	1.23943e+08
Q99614_C28	Q99614	VTDTQEAECAGPPVPDPK	VTDTQEAEC*AGPPVPDPK	C	-0.0280843	0.0777555	0.0248356	8.65663e+07	8.68388e+07	1.72653e+08
Q5SNT2_C617	Q5SNT2	EDDSSQSSTCVVDTTTR	EDDSSQSSTC*VVDTTTR	C	0.00728509	0.0437234	0.0255042	3.32241e+07	3.36445e+07	6.68686e+07
Q8TBM8_C77	Q8TBM8	KPSGSGDQSKPNCTK	KPSGSGDQSKPNC*TK	C	0.0116198	0.0415847	0.0266022	69033396	70497555	139530951
Q9GZU3_C18	Q9GZU3	NPLCEPGSSGGSSGSHTSSASVTSVR	NPLC*EPGSSGGSSGSHTSSASVTSVR	C	-0.00211013	0.0561941	0.027042	1.42427e+07	1.43957e+07	28638412
Q8WWK9_C674	Q8WWK9	ETDAFVCRPNAALCR	ETDAFVCRPNAALC*R	C	0.290791	-0.236335	0.027228	33823479	37162918	70986397
Q9ULT8_C1389	Q9ULT8	KGSSSSVCSVASSSDISLGSTK	KGSSSSVC*SVASSSDISLGSTK	C	0.0174107	0.0408975	0.0291541	43649609	44275726	87925335
Q9H6F5_C116	Q9H6F5	CQPKPSEEAPK	C*QPKPSEEAPK	C	0.0312407	0.0277262	0.0294835	68533272	6.9934e+07	1.38467e+08
Q96SK2_C301	Q96SK2	SQAPCANKDEADLSSK	SQAPC*ANKDEADLSSK	C	-0.0563403	0.117736	0.0306977	14666941	14894790	29561731
Q96KC8_C380	Q96KC8	DSVTCSPGMVR	DSVTC*SPGMVR	C	0.0286217	0.0373907	0.0330062	202540782	206928038	409468820
Q14247_C112	Q14247	HCSQVDSVR	HC*SQVDSVR	C	0.0151229	0.051216	0.0331694	4.19391e+07	4.30631e+07	8.50022e+07
P49792_C1335	P49792	IVKEPTSHDNKDICK	IVKEPTSHDNKDIC*K	C	0.0427613	0.0245698	0.0336656	198041123	201619335	399660458
O95793_C574	O95793	TGNGPMSVCGR	TGNGPMSVC*GR	C	0.0525092	0.0174159	0.0349625	86611507	89520119	176131626
Q06124_C318	Q06124	CNNSKPK	C*NNSKPK	C	4.47148e-05	0.0713926	0.0357187	72419600	74259692	146679292
O60343_C74	O60343	SQKPEAGGCGAPAAR	SQKPEAGGC*GAPAAR	C	0.156861	-0.0811374	0.0378616	1.35121e+08	1.36637e+08	2.71757e+08
Q6NXT6_C474	Q6NXT6	LSNPPATCTPGKPSSK	LSNPPATC*TPGKPSSK	C	-0.0325855	0.109219	0.038317	76933040	78742432	155675472
O95297_C203	O95297	DYTGCSTSESLSPVK	DYTGC*STSESLSPVK	C	0.0305958	0.0479959	0.0392958	2.79509e+07	2.86062e+07	56557093
Q8NFH5_C255	Q8NFH5	CALSSPSLAFTPPIK	C*ALSSPSLAFTPPIK	C	0.0925203	-0.0134824	0.039519	3.49056e+07	36857754	7.17633e+07
Q12769_C1166	Q12769	NHDGECTAAPTNR	NHDGEC*TAAPTNR	C	0.084356	0.00052389	0.0424399	6.10049e+07	6.31876e+07	1.24193e+08
Q8N9F7_C124	Q8N9F7	ACQCEGK	AC*QCEGK	C	0.188317	-0.102121	0.0430981	67617708	68387330	136005038
O95817_C179	O95817	SQSPAASDCSSSSSSASLPSSGR	SQSPAASDC*SSSSSSASLPSSGR	C	0.219467	-0.1275	0.0459834	8.63068e+07	89969830	173765192
Q5SNT2_C626	Q5SNT2	GCSEEAATWR	GC*SEEAATWR	C	0.0316417	0.0617227	0.0466822	53538870	5.50391e+07	1.08578e+08
Q9UNY4_C204	Q9UNY4	KQEEGAEIQCEAETGGTHK	KQEEGAEIQC*EAETGGTHK	C	0.268302	-0.172631	0.0478354	1.5229e+07	1.4091e+07	2.932e+07
O94903_C261	O94903	KPTPDKCAADVK	KPTPDKC*AADVK	C	0.0964677	0.00135725	0.0489125	4.90827e+07	50061650	9.91443e+07
Q8N2K0_C52	Q8N2K0	CAADAGMK	C*AADAGMK	C	0.0988279	0.00392069	0.0513743	189456266	198156635	382083630
Q5SW79_C967	Q5SW79	CSTGSPSK	C*STGSPSK	C	0.0548189	0.048045	0.0514319	1.27486e+07	13219791	2.59684e+07
O14523_C359	O14523	SSSCGDTELLGQATLPVGSPSRPLSR	SSSC*GDTELLGQATLPVGSPSRPLSR	C	0.0589645	0.0442914	0.0516279	58865727	61005122	119870849
P49247_C62	P49247	GGAGNTSTSCGDSNSICPAPSTMSK	GGAGNTSTSC*GDSNSICPAPSTMSK	C	0.203812	-0.0980737	0.0528693	7.03182e+06	7621470	1.46533e+07
Q8IY26_C55	Q8IY26	ATAVDPTCAR	ATAVDPTC*AR	C	0.0155559	0.0915463	0.0535511	173528688	178370086	351898774
Q9NRL3_C337	Q9NRL3	CTVDGSPHELESR	C*TVDGSPHELESR	C	0.213054	-0.105361	0.0538467	2.16976e+07	2.39729e+07	4.56705e+07
Q96CP6_C576	Q96CP6	AHGDGPQHPDPDPCAR	AHGDGPQHPDPDPC*AR	C	-0.00457253	0.114006	0.0547168	40978565	43254420	84232985
Q5VV42_C538	Q5VV42	NGLGNQLSSGSHTSAASQCDSASSR	NGLGNQLSSGSHTSAASQC*DSASSR	C	0.0399801	0.0709387	0.0554594	124000360	128983492	252983852
Q96GZ6_C14	Q96GZ6	LDSCGKPGELGLPHPLSTGGLPVASEDGALR	LDSC*GKPGELGLPHPLSTGGLPVASEDGALR	C	0.234328	-0.121127	0.0566003	2.25754e+07	2.2448e+07	4.50235e+07
Q7Z434_C283	Q7Z434	QGAESDQAEPIICSSGAEAPANSLPSK	QGAESDQAEPIIC*SSGAEAPANSLPSK	C	0.092266	0.0256636	0.0589648	3.03852e+07	32153676	6.25389e+07
Q9BU23_C696	Q9BU23	DSGAASEQATAAPNPCSSSSR	DSGAASEQATAAPNPC*SSSSR	C	0.092492	0.0286281	0.06056	756405294	791557862	1547963156
Q9Y2U8_C346	Q9Y2U8	NLEEAAAAEQGGGCDQVDSSPVPR	NLEEAAAAEQGGGC*DQVDSSPVPR	C	0.035671	0.086656	0.0611635	73700191	7.6498e+07	1.50198e+08
O75391_C191	O75391	TYGCVPVANKR	TYGC*VPVANKR	C	0.0647944	0.0576428	0.0612186	2.54335e+07	25981737	50877000
P78347_C215	P78347	SILSPGGSCGPIK	SILSPGGSC*GPIK	C	0.0688697	0.0545346	0.0617021	50978143	53370679	104348822
P30519_C282	P30519	GALEGSSCPFR	GALEGSSC*PFR	C	0.0124538	0.117035	0.0647444	6.52895e+07	6.69627e+07	1.32252e+08
O75845_C285	O75845	SSHSGNGCK	SSHSGNGC*K	C	0.122985	0.00668815	0.0648364	1.78091e+08	180365167	3.58457e+08
Q8TCD1_C71	Q8TCD1	GPTEICDK	GPTEIC*DK	C	0.119524	0.0112786	0.0654015	4.20364e+07	4.51466e+07	87182951
P49790_C1129	P49790	CQPVFSFGNSEQTK	C*QPVFSFGNSEQTK	C	-0.00956168	0.14149	0.0659644	5.762e+07	5.89344e+07	116554428
Q9NSV4_C1125	Q9NSV4	SHYNINCNSTR	SHYNINC*NSTR	C	0.0624054	0.0723531	0.0673793	22463362	23534704	45998066
O14654_C522	O14654	GSGGGQGSNGQGSSSHSSGGNQCSGEGQGSR	GSGGGQGSNGQGSSSHSSGGNQC*SGEGQGSR	C	0.10391	0.0323556	0.0681328	13594755	14104505	27699260
O75122_C976	O75122	KDDGDSMCGGPGMSDPR	KDDGDSMC*GGPGMSDPR	C	0.154571	-0.0170094	0.0687806	36163649	3.84551e+07	7.46187e+07
P16615_C997	P16615	ECVQPATK	EC*VQPATK	C	0.163857	-0.0234047	0.0702261	1.479e+09	1588051476	3.06705e+09
Q8NFG4_C335	Q8NFG4	ELTQGPAESSSLSGCGSWQPR	ELTQGPAESSSLSGC*GSWQPR	C	-0.0120876	0.165267	0.0765898	20133102	2.08973e+07	4.10304e+07
P20810_C413	P20810	TSMCSIQSAPPEPATLK	TSMC*SIQSAPPEPATLK	C	0.0579942	0.0967319	0.077363	85882174	9.16672e+07	176141456
P09936_C152	P09936	NEAIQAAHDAVAQEGQCR	NEAIQAAHDAVAQEGQC*R	C	-0.0333689	0.190362	0.0784964	1.42552e+08	1.45314e+08	2.85523e+08
Q9BSD7_C101	Q9BSD7	NADCSSGPGQR	NADC*SSGPGQR	C	0.138934	0.0182291	0.0785816	100334152	107178648	207512800
Q9H7E9_C50	Q9H7E9	NPSTVCLCPEQPTCSNADSR	NPSTVCLCPEQPTC*SNADSR	C	0.0984782	0.0587095	0.0785939	1.45471e+07	15432965	2.99801e+07
P54687_C8	P54687	DCSNGCSAECTGEGGSK	DCSNGC*SAECTGEGGSK	C	0.178329	-0.0204264	0.0789512	5.00129e+06	5.36337e+06	1.03647e+07
Q13439_C1729	Q13439	NVAAYTEQEEADSQGCVQK	NVAAYTEQEEADSQGC*VQK	C	-0.0402219	0.198872	0.0793252	12733245	1.29239e+07	2.56572e+07
P17706_C330	P17706	CTGLSSK	C*TGLSSK	C	0.0344601	0.125387	0.0799236	179319012	186578898	365897910
Q9BZE9_C225	Q9BZE9	GDLSRPEDADTSGPCCEHTQEK	GDLSRPEDADTSGPCC*EHTQEK	C	-0.0495451	0.211881	0.0811681	1.1183e+07	1.18043e+07	2.29873e+07
P43487_C132	P43487	AWVWNTHADFADECPKPELLAIR	AWVWNTHADFADEC*PKPELLAIR	C	-0.259324	0.428606	0.0846406	1.19348e+07	1.55823e+07	2.75171e+07
Q7L576_C98	Q7L576	CNEQPNR	C*NEQPNR	C	0.109059	0.061814	0.0854363	4.41921e+07	4.71215e+07	9.13136e+07
Q9BXB4_C34	Q9BXB4	NSSCGGGISSSSSSR	NSSC*GGGISSSSSSR	C	0.113852	0.0630856	0.0884689	139944697	149985391	289930088
Q15365_C194	Q15365	VMTIPYQPMPASSPVICAGGQDR	VMTIPYQPMPASSPVIC*AGGQDR	C	0.0979729	0.0826701	0.0903215	5.31142e+07	5.63544e+07	109468638
P30519_C265	P30519	CPFYAAEQDK	C*PFYAAEQDK	C	0.133192	0.0479771	0.0905844	761034731	8.19963e+08	1.581e+09
Q8N5B7_C369	Q8N5B7	SPCDSSSSNGANR	SPC*DSSSSNGANR	C	0.132068	0.0493036	0.0906859	104088263	111871164	215959427
Q9ULL1_C618	Q9ULL1	RASSAGESNTCPPEIGTSDR	RASSAGESNTC*PPEIGTSDR	C	0.201814	-0.0198947	0.0909599	30582000	32256366	62838366
Q15417_C173	Q15417	CASQAGMTAYGTR	C*ASQAGMTAYGTR	C	0.0843718	0.102046	0.093209	66060612	7.02006e+07	1.36261e+08
O15355_C241	O15355	GTEAGQVGEPGIPTGEAGPSCSSASDK	GTEAGQVGEPGIPTGEAGPSC*SSASDK	C	0.0801824	0.125269	0.102726	69085226	7.40125e+07	1.43098e+08
Q9Y6A5_C426	Q9Y6A5	SGCSEAQPPESPETR	SGC*SEAQPPESPETR	C	-0.125209	0.331143	0.102967	3.2201e+07	3.18248e+07	6.40258e+07
Q9Y2U8_C108	Q9Y2U8	TPGGLCR	TPGGLC*R	C	-0.0409812	0.249203	0.104111	194076676	199063516	393140192
Q6IBS0_C141	Q6IBS0	HLSSCAAPAPLTSAER	HLSSC*AAPAPLTSAER	C	0.0342502	0.176286	0.105268	2.1264e+07	22463063	4.3727e+07
Q53ET0_C515	Q53ET0	SLQQPGLPSQSCSVQSSGGQPPGR	SLQQPGLPSQSC*SVQSSGGQPPGR	C	0.152557	0.0588144	0.105686	20453008	2.22173e+07	4.26703e+07
Q8N5K1_C92	Q8N5K1	VVNEINIEDLCLTK	VVNEINIEDLC*LTK	C	0.126989	0.0854033	0.106196	7.22829e+08	7.86911e+08	1.50974e+09
Q86Y07_C373	Q86Y07	SAESCATWK	SAESC*ATWK	C	0.0664972	0.146737	0.106617	81141800	86773996	167915796
O75410_C514	O75410	LASTSCGQK	LASTSC*GQK	C	0.0341377	0.184843	0.10949	61615639	64952596	126568235
Q8TBB5_C373	Q8TBB5	EEPEGGSRPACGGAGTQGPVQLVK	EEPEGGSRPAC*GGAGTQGPVQLVK	C	-0.0698736	0.290941	0.110534	2.03207e+07	2.29566e+07	4.32773e+07
Q7L5N7_C4	Q7L5N7	CAQAAEVAATVPGAGVGNVGLRPPMVPR	C*AQAAEVAATVPGAGVGNVGLRPPMVPR	C	0.0817045	0.146943	0.114324	156220710	1.73042e+08	326968768
Q86XL3_C286	Q86XL3	DGLCLSESETVNK	DGLC*LSESETVNK	C	0.103864	0.128168	0.116016	9.69473e+07	1.0482e+08	201766910
Q96T88_C170	Q96T88	DEPCSSTSRPALEEDVIYHVK	DEPC*SSTSRPALEEDVIYHVK	C	0.0438702	0.189904	0.116887	1.31432e+07	14544328	2.76875e+07
Q13155_C23	Q13155	VELPTCMYR	VELPTC*MYR	C	0.0686338	0.175129	0.121882	47324933	5.07895e+07	9.81144e+07
Q9UHD8_C248	Q9UHD8	SQEATEAAPSCVGDMADTPR	SQEATEAAPSC*VGDMADTPR	C	0.0386635	0.208538	0.123601	51275723	54305536	105581259
P49790_C148	P49790	SHLNFSMLESPALHCQPSTSSAFPIGSSGFSLVK	SHLNFSMLESPALHC*QPSTSSAFPIGSSGFSLVK	C	0.290441	-0.0411889	0.124626	7.14722e+07	7.81793e+07	149651509
Q7Z2K6_C43	Q7Z2K6	AQEPLVDGCSGGGR	AQEPLVDGC*SGGGR	C	0.146647	0.103507	0.125077	398363360	440328744	838692104
O76071_C234	O76071	QYLPGNEQGVACSGSDPSWK	QYLPGNEQGVAC*SGSDPSWK	C	0.125735	0.125987	0.125861	3.25621e+07	35528638	6.80907e+07
Q9NV70_C566	Q9NV70	QHNCGTPLPVSSEK	QHNC*GTPLPVSSEK	C	0.130527	0.129739	0.130133	2.20431e+07	24125990	4.61691e+07
Q7Z6Z7_C2721	Q7Z6Z7	DQSAQCTASK	DQSAQC*TASK	C	-0.0091508	0.271573	0.131211	4.26591e+07	4.30757e+07	8.57348e+07
A1X283_C783	A1X283	GPQCEGHESR	GPQC*EGHESR	C	0.129542	0.134243	0.131893	16855360	18474148	35329508
Q8WUD6_C386	Q8WUD6	TACHQAPEQVQVLSSK	TAC*HQAPEQVQVLSSK	C	0.131275	0.134944	0.13311	10345312	1.13428e+07	2.16881e+07
P23921_C779	P23921	NTAAMVCSLENRDECLMCGS	NTAAMVC*SLENRDECLMCGS	C	0.186608	0.0816546	0.134131	13585395	1.51264e+07	2.87118e+07
Q14694_C254	Q14694	TAGQPEGGPGADFGQSCFPAEAGR	TAGQPEGGPGADFGQSC*FPAEAGR	C	0.0170702	0.2513	0.134185	2.71503e+07	2.85952e+07	55745485
Q13444_C733	Q13444	GPTCQYR	GPTC*QYR	C	0.265277	0.00493468	0.135106	33206433	37286794	70493227
Q8ND83_C8	Q8ND83	CASAGVSSGAGSGPVVNAELEVK	C*ASAGVSSGAGSGPVVNAELEVK	C	-0.11805	0.38916	0.135555	26823710	2.64311e+07	5.32548e+07
P01891_C363	P01891	GGSYSQAASSDSAQGSDVSLTACK	GGSYSQAASSDSAQGSDVSLTAC*K	C	0.157005	0.119412	0.138209	2.1867e+08	241947292	4.60617e+08
P54105_C73	P54105	SDCLGEHLYVMVNAK	SDC*LGEHLYVMVNAK	C	0.119698	0.157817	0.138758	27737396	30584821	58322217
A1L0T0_C568	A1L0T0	EQVPSLGSNVACGLAYTDYHK	EQVPSLGSNVAC*GLAYTDYHK	C	0.138041	0.143442	0.140742	56921469	62689821	119611290
Q9BTX1_C468	Q9BTX1	MAGIFDVNTCYGSPQSPQLIR	MAGIFDVNTC*YGSPQSPQLIR	C	0.15906	0.126707	0.142883	5.04955e+07	5.52779e+07	1.05773e+08
Q7Z4H7_C926	Q7Z4H7	TTIACSLGELPNLKEEDILNK	TTIAC*SLGELPNLKEEDILNK	C	0.151046	0.135949	0.143498	22566786	2.49925e+07	4.75593e+07
Q8TBM8_C63	Q8TBM8	NGSTAGNSPHCR	NGSTAGNSPHC*R	C	0.0585477	0.231209	0.144878	1.47269e+07	1.6342e+07	31068865
Q86XL3_C674	Q86XL3	CSAFPLEQEADLIEAAEPGGPHSSR	C*SAFPLEQEADLIEAAEPGGPHSSR	C	0.12223	0.168559	0.145394	48451796	53079172	101530968
Q6ZWT7_C505	Q6ZWT7	FDEGENSLGQNSFSTTNNVCNQNQEIASR	FDEGENSLGQNSFSTTNNVC*NQNQEIASR	C	0.192032	0.102486	0.147259	9.30389e+07	1.02237e+08	195276117
P40222_C523	P40222	VTEAPCYPGAPSTEASGQTGPQEPTSAR	VTEAPC*YPGAPSTEASGQTGPQEPTSAR	C	0.110827	0.186707	0.148767	42447864	5.36388e+07	88839809
Q9HA64_C24	Q9HA64	ATGHSGGGCISQGR	ATGHSGGGC*ISQGR	C	0.214108	0.107977	0.161043	1.1471e+08	128444810	2.43155e+08
Q9UJC3_C692	Q9UJC3	LVSGGGACSDTGACTPAR	LVSGGGAC*SDTGACTPAR	C	0.0848913	0.23735	0.161121	28194142	30947502	59141644
P50851_C1228	P50851	LINDCHGSVSEASSEQK	LINDC*HGSVSEASSEQK	C	0.217778	0.105398	0.161588	31138866	35429623	66568489
Q32MZ4_C750	Q32MZ4	CEMSEHPSQTVR	C*EMSEHPSQTVR	C	0.10622	0.222219	0.164219	25488396	28207282	53695678
Q14676_C1742	Q14676	AAGNPGSLAAPIDHKPCSAPLEPK	AAGNPGSLAAPIDHKPC*SAPLEPK	C	0.344269	0.0116623	0.177966	9.60906e+06	1.04867e+07	2.00957e+07
O15269_C133	O15269	YGVGTCGPR	YGVGTC*GPR	C	0.255039	0.105517	0.180278	225914782	262610056	488524838
Q9NT62_C182	Q9NT62	KIVEACK	KIVEAC*K	C	0.224255	0.138554	0.181405	23674570	27114729	50789299
Q14008_C1113	Q14008	FQPASAPAEDCISSSTEPKPDPK	FQPASAPAEDC*ISSSTEPKPDPK	C	0.446641	-0.083784	0.181428	38408354	49314463	87722817
Q9NZB2_C1088	Q9NZB2	TCNTNPHLNALSTDSACR	TC*NTNPHLNALSTDSACR	C	-0.0727922	0.463204	0.195206	9823713	1.07541e+07	2.05778e+07
O95817_C151	O95817	QCGQVAAAAAAQPPASHGPER	QC*GQVAAAAAAQPPASHGPER	C	0.146214	0.24905	0.197632	60597840	7.40285e+07	130604552
Q8TD19_C878	Q8TD19	LNPAVTCAGK	LNPAVTC*AGK	C	0.169902	0.229281	0.199592	3.57046e+07	40401043	7.61056e+07
Q96GX2_C75	Q96GX2	LPLCSLPGEPGNGPDQQLQR	LPLC*SLPGEPGNGPDQQLQR	C	0.0219146	0.381455	0.201685	25711689	28009902	53721591
Q6L8Q7_C108	Q6L8Q7	SRPNASGGAACSGPGPEPAVFCEPVVK	SRPNASGGAAC*SGPGPEPAVFCEPVVK	C	0.10771	0.341852	0.224781	2.30694e+07	2.6284e+07	49353472
Q92575_C186	Q92575	SDTATGGESAGHATSSQEPSGCSDQRPAEDLNIR	SDTATGGESAGHATSSQEPSGC*SDQRPAEDLNIR	C	0.261684	0.188124	0.224904	119752818	137450105	254307349
Q9BZI7_C319	Q9BZI7	ASGQSCTLPK	ASGQSC*TLPK	C	-0.0601695	0.511469	0.22565	2.43621e+07	2.51194e+07	4.94815e+07
Q86V24_C96	Q86V24	MEEFVCK	MEEFVC*K	C	-0.0667275	0.525857	0.229565	1.53952e+07	16357622	3.17528e+07
Q9NUQ3_C56	Q9NUQ3	ADMLCNSQSNDILQHQGSNCGGTSNK	ADMLC*NSQSNDILQHQGSNCGGTSNK	C	0.36569	0.108862	0.237276	1.35801e+07	15873257	2.94534e+07
O00161_C112	O00161	TTWGDGGENSPCNVVSK	TTWGDGGENSPC*NVVSK	C	0.141051	0.347007	0.244029	2.7266e+07	3.0919e+07	5.8185e+07
Q9NUQ3_C71	Q9NUQ3	ADMLCNSQSNDILQHQGSNCGGTSNK	ADMLCNSQSNDILQHQGSNC*GGTSNK	C	0.263376	0.245844	0.25461	18621445	22266047	40887492
Q99700_C852	Q99700	DSFIENSSSNCTSGSSKPNSPSISPSILSNTEHK	DSFIENSSSNC*TSGSSKPNSPSISPSILSNTEHK	C	0.524651	0.00756696	0.266109	10416170	12722518	23138688
O14545_C476	O14545	STSGPRPGCQPSSPCVPK	STSGPRPGC*QPSSPCVPK	C	0.281451	0.264304	0.272878	23543560	28402028	51945588
Q6ZN17_C201	Q6ZN17	EVGGGHGCTSPPFPQEAR	EVGGGHGC*TSPPFPQEAR	C	0.202108	0.344605	0.273356	20384985	24152615	44537600
P23921_C790	P23921	NTAAMVCSLENRDECLMCGS	NTAAMVCSLENRDECLMC*GS	C	0.363517	0.185159	0.274338	2.7166e+07	3.35404e+07	6.07064e+07
Q86SK9_C14	Q86SK9	IPFCDAK	IPFC*DAK	C	0.0876954	0.461085	0.27439	80343983	90065136	170409119
Q8N6T3_C351	Q8N6T3	SPSSDSWTCADTSTER	SPSSDSWTC*ADTSTER	C	0.369355	0.191502	0.280429	48765939	6.36931e+07	110817764
P27816_C654	P27816	KPCNSQPSELSSETSGIARPEEGRPVVSGTGNDITTPPNK	KPC*NSQPSELSSETSGIARPEEGRPVVSGTGNDITTPPNK	C	0.213175	0.367339	0.290257	23395249	32003542	52467185
Q8TC07_C686	Q8TC07	NDSPTQIPVSSDVCR	NDSPTQIPVSSDVC*R	C	0.102748	0.485316	0.294032	3.71112e+07	41133566	7.82448e+07
Q00013_C242	Q00013	VASMAQSAPSEAPSCSPFGK	VASMAQSAPSEAPSC*SPFGK	C	0.154707	0.450273	0.30249	5.19793e+06	6.23734e+06	1.14353e+07
Q7Z2K8_C428	Q7Z2K8	MDPMCSGKPELLSPGQAER	MDPMC*SGKPELLSPGQAER	C	0.34614	0.262527	0.304333	7.36656e+06	9062262	1.64288e+07
Q6FI81_C285	Q6FI81	CASCPYLGMPAFKPGEK	C*ASCPYLGMPAFKPGEK	C	0.0192614	0.595452	0.307357	1.16679e+07	14325174	2.59931e+07
P04035_C382	P04035	NNQKCDSVEEETGINR	NNQKC*DSVEEETGINR	C	0.10762	0.510995	0.309307	10741155	1.28547e+07	2.35958e+07
O43432_C461	O43432	TCLSEDAK	TC*LSEDAK	C	0.00549797	0.625665	0.315582	1.95707e+07	2.1881e+07	4.14518e+07
A2RRP1_C1453	A2RRP1	CGGAYQIGTTANEDLEK	C*GGAYQIGTTANEDLEK	C	0.0577325	0.586753	0.322243	3.50019e+07	3.97495e+07	7.47514e+07
Q92575_C144	Q92575	SETSVANGSQSESSVSTPSASFEPNNTCENSQSR	SETSVANGSQSESSVSTPSASFEPNNTC*ENSQSR	C	0.270784	0.377433	0.324109	15459564	19246957	34706521
Q9Y2U8_C754	Q9Y2U8	WIQPSASCDK	WIQPSASC*DK	C	0.477795	0.17898	0.328387	4.34219e+07	5.91997e+07	1.02622e+08
Q15005_C17	Q15005	SGGSGGCSGAGGASNCGTGSGR	SGGSGGC*SGAGGASNCGTGSGR	C	0.328919	0.352973	0.340946	3.44567e+09	4.3607e+09	7.80638e+09
P21333_C2543	P21333	ATCAPQHGAPGPGPADASK	ATC*APQHGAPGPGPADASK	C	0.556502	0.168234	0.362368	30743647	37293494	68037141
P23588_C457	P23588	SLENETLNKEEDCHSPTSKPPKPDQPLK	SLENETLNKEEDC*HSPTSKPPKPDQPLK	C	0.603203	0.15356	0.378382	3.18593e+07	36055206	6.79145e+07
P02545_C591	P02545	TVLCGTCGQPADK	TVLCGTC*GQPADK	C	0.612602	0.164694	0.388648	71211055	1.07047e+08	1.78258e+08
P47756_C206	P47756	QMEKDETVSDCSPHIANIGR	QMEKDETVSDC*SPHIANIGR	C	0.4292	0.381705	0.405452	1.24672e+07	16562841	2.903e+07
Q4VCS5_C1047	Q4VCS5	LSIPSLTCNPDK	LSIPSLTC*NPDK	C	0.273873	0.617793	0.445833	7.60898e+07	1.04456e+08	1.7914e+08
Q13362_C513	Q13362	ALEAHCR	ALEAHC*R	C	0.944478	0.0802595	0.512369	8.3935e+06	9.85845e+06	18251944
Q7Z434_C133	Q7Z434	TSDRPPDPLEPPSLPAERPGPPTPAAAHSIPYNSCR	TSDRPPDPLEPPSLPAERPGPPTPAAAHSIPYNSC*R	C	0.414941	0.634574	0.524757	25762513	3.89295e+07	6.46921e+07
P62633_C161	P62633	CGESGHLAR	C*GESGHLAR	C	0.480538	0.630364	0.555451	9.67543e+06	1.44222e+07	2.40976e+07
Q9HDC5_C626	Q9HDC5	NPASNDSCPALEK	NPASNDSC*PALEK	C	0.563457	0.666544	0.615001	100694994	149214562	249909556
